# Supplementary material
Source: PubMed Central journal article supplement (PMC3486549)
Supplement: AAC.00574-12_zac999101295so1.pdf [file AAC.00574-12_zac999101295so1.pdf]

**Supplemental Table 1: Primer sequences**

| Name       | Sequence (5' → 3')          | Length | GC | Tm   |
|------------|-----------------------------|--------|----|------|
| 01_mecA_lp | CGTCATCTTTGAATAACCAAG       | 21     | 38 | 50.3 |
| 02_mecA_lp | ATCTTTAGATGCATAAAAGAATACG   | 25     | 28 | 51.2 |
| 03_mecA_lp | ATTTGGCTGTTTTTTGATGC        | 20     | 35 | 51.2 |
| 04_mecA_lp | TGAAATTTTTATCTTCAATTGCATC   | 25     | 24 | 51   |
| 05_mecA_lp | TTAATGGGACCAACATAACC        | 20     | 40 | 50.1 |
| 06_mecA_lp | ATTAATTGGACCCACATAACC       | 21     | 38 | 50.8 |
| 07_mecA_lp | TTAATTGGGCCAACATAACC        | 20     | 40 | 51.1 |
| 08_mecA_lp | TTAATAGGGCCAACATAACC        | 20     | 40 | 49.9 |
| 09_mecA_lp | ATTAATAGGGCCACATATCC        | 21     | 38 | 50   |
| 10_mecA_lp | AATTAATAGGGCCACGTATC        | 21     | 38 | 50.8 |
| 11_mecA_lp | AATAGTTAGTTGAATATCTTTGCC    | 24     | 29 | 50.5 |
| 12_mecA_lp | AGTCAGTTGAATATCTTTGCC       | 21     | 38 | 51.2 |
| 13_mecA_lp | GATGGTTAATTTAATATCTTTGCC    | 24     | 29 | 49.9 |
| 14_mecA_lp | CAATGGTTAATTTAATATCTTTGCC   | 25     | 28 | 50.9 |
| 15_mecA_lp | ATCAATGGTTAATTTAATATCTTTACC | 27     | 22 | 50.1 |
| 16_mecA_lp | TATAGTTAAATGAAGATCTTTCCG    | 25     | 28 | 50.6 |
| 17_mecA_lp | TTTCTGTTTCATTAGTTGTAAGAT    | 24     | 25 | 49.9 |

**Supplemental Table 2: Probe sequences**

| Name       | Sequence (5' → 3')                       | Length | GC | Tm   |
|------------|------------------------------------------|--------|----|------|
| 01_mecA_hp | GTTCCACTTATTTTAATAGTTGTAGTTGTCGG         | 32     | 34 | 58.6 |
| 02_mecA_hp | GTTCCACTTATTTTAAAGTTTGTAGTTGTCGG         | 32     | 34 | 59.3 |
| 03_mecA_hp | CACTCATTTTAATAGTTGCAGCTGCCG              | 27     | 44 | 60.7 |
| 04_mecA_hp | AATAATTGCTCTACTCATTGATAGTTGCAGC          | 33     | 33 | 60.3 |
| 05_mecA_hp | TAATCATAGCCATCGTGGTTGTAATCATTGTT         | 32     | 34 | 60.7 |
| 06_mecA_hp | TAATCATAGCCATCGTGATAGTAATCATCGC          | 31     | 39 | 60.3 |
| 07_mecA_hp | TAATCATCGCCATCGTGATAGTAATCATCG           | 30     | 40 | 60.4 |
| 08_mecA_hp | TAATCATCGCCATCGTGATTGTAATCATC            | 29     | 38 | 59.4 |
| 09_mecA_hp | TTTATATTAGTGTGCTAGTTCTTTTACTAATTATGATTAT | 40     | 20 | 56.7 |
| 10_mecA_hp | GTCGTAACATCCTCTAGAAGAAGCGAC              | 28     | 46 | 59.8 |
| 11_mecA_hp | GTCGTAACATCCTCTAGAAAAGCGACTT             | 30     | 40 | 60.1 |
| 12_mecA_hp | GTCGTAACATCCTCTAGAAAAGCGAC               | 28     | 46 | 60.2 |
| 13_mecA_hp | GTCGCAACTATCCTCTAGAAAAGCGA               | 27     | 44 | 60.4 |
| 14_mecA_hp | CGACAGTATCCGTTGAAGAAGCA                  | 24     | 50 | 60.5 |
| 15_mecA_hp | GTCGACAATATCCGTTGAAGAAGCA                | 26     | 46 | 61   |
| 16_mecA_hp | GTCGAGAGTATCCGTTTGAAGAAGCAA              | 27     | 44 | 60.6 |
| 17_mecA_hp | AAAGCCGTGTTTATCCATTGAACGAAG              | 27     | 41 | 60.1 |
| 18_mecA_hp | TGTCACAATCGTTGACGATAATAGCAATAC           | 30     | 37 | 59.6 |
| 19_mecA_hp | GTCACAATCGTTAGAGTCGACGATAATAGC           | 30     | 43 | 60.9 |
| 20_mecA_hp | CTATCATGGACGATAATAGCAATAAAGTCGC          | 31     | 39 | 59.7 |
| 21_mecA_hp | GACGGATATCGGGTCACAATAATTGATAATAAT        | 33     | 33 | 59.2 |
| 22_mecA_hp | CGGGTATCGTGTGACAATTATTGATGATAATA         | 32     | 34 | 59.2 |
| 23_mecA_hp | CGGATACCGTGTGACAATAATTGATGATAATA         | 32     | 34 | 59.2 |
| 24_mecA_hp | GGATACCGTGTGACAATTATTGATGATCAAA          | 31     | 35 | 59.7 |
| 25_mecA_hp | GGTTTTAAGGTATCCATTGCAAATACTTATGAC        | 33     | 33 | 59   |
| 26_mecA_hp | GATGAATATTTAAGTGATTTTCGCAAAAAAATTC       | 34     | 24 | 56.8 |
| 27_mecA_hp | GATGAATATTTAAGAGATTTTCGCAAAAAAATTC       | 34     | 24 | 56.5 |
| 28_mecA_hp | GATACCTTCGTTCCACTTTAAAACCGTTAA           | 30     | 37 | 59.6 |
| 29_mecA_hp | GATACCTTCGTTCCACTTTAAAACCGTTAA           | 29     | 38 | 59.3 |

**Supplemental Table 3:** Alignments of known *mecA* alleles. A FASTA version of this file is available on request.

|                             | .... ....  | .... ....  | .... ....  | .... ....   | .... ....  | .... ....  | .... ....  | .... ....  | .... ....  |
|-----------------------------|------------|------------|------------|-------------|------------|------------|------------|------------|------------|
|                             | 5          | 15         | 25         | 35          | 45         | 55         | 65         | 75         | 85         |
| AB546267_Sfleur             | atgaaaga   | taaaaattgt | tccacttatt | ttaatagttg  | tagttgtcgg | gtttggtata | tatttgtatg | cttcaaaaga | taaagaaatt |
| Y13095_Ssci                 | atgaaaaaga | taaaaattgt | tccacttatt | ttaatagttg  | tagttgtcgg | gtttggtata | tatttttatg | cttcaaaaga | taaagaaatt |
| AY786579_Saur               | atgaaaaaga | taaaaattgt | tccacttatt | ttaatagttg  | tagttgtcgg | gtttggtata | tatttttatg | cttcaaaaga | taaagaaatt |
| ABSA01000066_Saur_epi       | atgaaaaaga | taaaaattgt | tccacttatt | ttaatagttg  | tagttgtcgg | gtttggtata | tatttttatg | cttcaaaaga | taaagaaatt |
| GU235984_Saur               | atgaaaaaga | taaaaattgt | tccacttatt | ttaatagttg  | tagttgtcgg | gtttggtata | tatttttatg | cttcaaaaga | taaagaaatt |
| EU929081_Spseudin           | atgaaaaaga | taaaaattgt | tccacttatt | ttaatagttg  | tagttgtcgg | gtttggtata | tatttttatg | cttcaaaaga | taaggaaatt |
| GU370073_Saur_sap_vit_kloo. | atgaaaaaga | taaaaattgt | tccacttatt | ttaatagttg  | tagttgtcgg | gtttggtata | tatttttatg | cttcaaaaga | taaagaaatt |
| AB037671_Saur               | atgaaaaaga | taaaaattgt | tccacttatt | ttaatagttg  | tagttgtcgg | gtttggtata | tatttttatg | cttcaaaaga | taaagaaatt |
| GU235983_Saur               | atgaaaaaga | taaaaattgt | tccacttatt | ttaatagttg  | tagttgtcgg | gtttggtata | tatttttatg | cttcaaaaga | taaagaaatt |
| AB221119_Saur               | atgaaaaaga | taaaaattgt | tccacttatt | ttaatagttg  | tagttgtcgg | gtttggtata | tatttttatg | cttcaaaaga | taaagaaatt |
| FN433596_TW20_Saur_ST239    | atgaaaaaga | taaaaattgt | tccacttatt | ttaatagttg  | tagttgtcgg | gtttggtata | tatttttatg | cttcaaaaga | taaagaaatt |
| BA000018_N315_Saur          | atgaaaaaga | taaaaattgt | tccacttatt | ttaatagttg  | tagttgtcgg | gtttggtata | tatttttatg | cttcaaaaga | taaagaaatt |
| GQ902038_Saur_haem_pseud    | atgaaaaaga | taaaaattgt | tccacttatt | ttaatagttg  | tagttgtcgg | gtttggtata | tatttttatg | cttcaaaaga | taaagaaatt |
| EU929082_Spseudin           | atgaaaaaga | taaaaattgt | tccacttatt | ttaatagttg  | tagttgtcgg | gtttggtata | tatttttatg | cttcaaaaga | taaagaaatt |
| AB546266_Sfleur             | atgaaaaaga | taaaaattgt | tccacttatt | ttaatagttg  | tagttgtcgg | gtttggtata | tatttttatg | cttcaaaaga | taaagaaatt |
| AM048805_Scapi              | atgaaaaaga | taaaaattgt | tccacttatt | ttaatagttg  | tagttgtcgg | gtttggtata | tatttttatg | cttcaaaaga | taaagaaatt |
| EU929079_Spseudin           | atgaaaaaga | taaaaattgt | tccacttatt | ttaaagtttg  | tagttgtcgg | gtttggtata | tatttttatg | cttcaaaaga | taaagaaatt |
| GU227428_Saur               | atgaaaaaga | taaaaattgt | tccacttatt | ttaatagttg  | tagttgtcgg | gtttggtata | tatttttatg | cttcaaaaga | taaagaaatt |
| Y14051_Saur                 | atgaaaaaga | taaaaattgt | tccacttatt | ttaatagttg  | tagttgtcgg | gtttggtata | tatttttatg | cttcaaaaga | taaagaaatt |
| Y00688_Saur                 | atgaaaaaga | taaaaattgt | tccacttatt | ttaatagttg  | tagttgtcgg | gtttggtata | tatttttatg | cttcaaaaga | taaagaaatt |
| EU929080_Spseudin           | atgaaaaaga | taaaaattgt | tccacttatt | ttaatagttg  | tagttgtcgg | gtttggtata | tatttttatg | cttcaaaaga | taaagaaatt |
| AM048807_Sklo_Scap          | atgaaaaaga | taaaaattgt | tccactcatt | ttaatagttg  | cagctgccgg | cgttggtaca | tatttttatg | cttcaaaaga | taaaaaaatt |
| AM048808_Sklo_cap_vit       | atgaaaaaga | taaaaattgt | tccactcatt | ttaatagttg  | cagctgccgg | cgttggtaca | tatttttatg | cttcaaaaga | taaaaaaatt |
| AB546780_Svit               | atgaaaaaaa | taataattgc | tctactcatt | ttgataagttg | cagctgccgg | cgttggtaca | tatttttatg | cttcaaaaga | taaaaaaatt |
| AY820253_Ssci               | atgaaaaaat | t---aatcat | agccatcgtg | gttgtaatca  | ttgtttagtc | ttcaagcata | tttttttatg | catcaaaaaa | cagccaata  |
| Y13052_Ssci                 | atgaaaaaat | t---aatcat | agccatcgtg | atagtaatca  | tcgctgttgg | ttcaggcgta | ttcttttatg | catctaaaga | taagaaaata |
| AB547235_Ssci               | atgaaaaaat | t---aatcat | cgccatcgtg | atagtaatca  | tcgctgttgg | ttcaggcgta | ttcttttatg | catctaaaga | taagaaaata |
| S. sciuri 09-LEM-1/3        | atgaaaaaat | t---aattat | agccatcgtg | atagtaatca  | ttgctgttgg | ttcaggcgta | ttcttttatg | catctagaga | tgatcaaata |
| Y09223_Ssci                 | atgaaaaaat | t---aatcat | cgccatcgtg | attgtaatca  | tcgctgttgg | ttcaggcgta | ttcttttatg | catctaaaga | taagaaaata |
| Y13094_Ssci                 | atgaaaaaat | t---aatcat | cgccatcgtg | attgtaatca  | tcgctgttgg | ttcaggcgta | ttcttttatg | catctaaaga | taagaaaata |
| AB547236_Ssci               | atgaaaaaat | t---aatcat | cgccatcgtg | attgtaatca  | tcgctgttgg | ttcaggcgta | ttcttttatg | catctaaaga | taagaaaata |
| FR821779_Saur_LGA251        | atgaaaaaaa | tttatattag | tgtgctagtt | cttttactaa  | ttatgat--- | -----tata  | ataacttggg | tattcaaaga | tgacgatatt |
| FR823292_Saur_M10           | atgaaaaaaa | tttatattag | tgtgctagtt | cttttactaa  | ttatgat--- | -----tata  | ataacttggg | tattcaaaga | tgacgatatt |

**Supplemental Table 3:** Alignments of known *mecA* alleles, continued

|                             | .... ....  | .... ....  | .... ....  | .... ....  | .... ....  | .... ....  | .... ....   | .... ....  | .... ....   |
|-----------------------------|------------|------------|------------|------------|------------|------------|-------------|------------|-------------|
|                             | 95         | 105        | 115        | 125        | 135        | 145        | 155         | 165        | 175         |
| AB546267_Sfleur             | aataaaacta | ttgatgcaat | tgaagataaa | aatttcaaac | aagtttataa | agatagcagt | tataatttcta | aaagcgataa | tggcgaagta  |
| Y13095_Ssci                 | aataatacta | ttgatgcaat | tggagataaa | aatttcaaac | aagtttataa | agatagcagt | tataatttcta | aaagcgataa | tggatgaagta |
| AY786579_Saur               | aataatacta | ttgatgcaat | tgaagataaa | aatttcaaac | aagtttataa | agatagcagt | tataatttcta | aaagcgataa | tggatgaagta |
| ABSA01000066_Saur_epi       | aataatacta | ttgatgcaat | tgaagataaa | aatttcaaac | aagtttataa | agatagcagt | tataatttcta | aaagcgataa | tggatgaagta |
| GU235984_Saur               | aataatacta | ttgatgcaat | tgaagataaa | aatttcaaac | aagtttataa | agatagcagt | tataatttcta | aaagcgataa | tggatgaagta |
| EU929081_Spseudin           | aataatacta | ttgatgcaat | tgaagataaa | aatttcaaac | aagtttataa | agatagcagt | tataatttcta | aaagcgataa | tggatgaagta |
| GU370073_Saur_sap_vit_kloo. | aataatacta | ttgatgcaat | tgaagataaa | aatttcaaac | aagtttataa | agatagcagt | tataatttcta | aaagcgataa | tggatgaagta |
| AB037671_Saur               | aataatacta | ttgatgcaat | tgaagataaa | aatttcaaac | aagtttataa | agatagcagt | tataatttcta | aaagcgataa | tggatgaagta |
| GU235983_Saur               | aataatacta | ttgatgcaat | tgaagataaa | aatttcaaac | aagtttataa | agatagcagt | tataatttcta | aaagcgataa | tggatgaagta |
| AB221119_Saur               | aataatacta | ttgatgcaat | tgaagataaa | aatttcaaac | aagtttataa | agatagcagt | tataatttcta | aaagcgataa | tggatgaagta |
| FN433596_TW20_Saur_ST239    | aataatacta | ttgatgcaat | tgaagataaa | aatttcaaac | aagtttataa | agatagcagt | tataatttcta | aaagcgataa | tggatgaagta |
| BA000018_N315_Saur          | aataatacta | ttgatgcaat | tgaagataaa | aatttcaaac | aagtttataa | agatagcagt | tataatttcta | aaagcgataa | tggatgaagta |
| GQ902038_Saur_haem_pseud    | aataatacta | ttgatgcaat | tgaagataaa | aatttcaaac | aagtttataa | agatagcagt | tataatttcta | aaagcgataa | tggatgaagta |
| EU929082_Spseudin           | aataatacta | ttgatgcaat | tgaagataaa | aatttcaaac | aagtttataa | agatagcagt | tataatttcta | aaagcgataa | tggatgaagta |
| AB546266_Sfleur             | aataatacta | ttgatgcaat | tgaagataaa | aatttcaaac | aagtttataa | agatagcagt | tataatttcta | aaagcgataa | tggatgaagta |
| AM048805_Scapi              | aataatacta | ttgatgcaat | tgaagataaa | aatttcaaac | aagtttataa | agatagcagt | tataatttcta | aaagcgataa | tggatgaagta |
| EU929079_Spseudin           | aataatacta | ttgatgcaat | tgaagataaa | aatttcaaac | aagtttataa | agatagcagt | tataatttcta | aaagcgataa | tggatgaagta |
| GU227428_Saur               | aataatacta | ttgatgcaat | tgaagataaa | aatttcaaac | aagtttataa | agatagcagt | tataatttcta | aaagcgataa | tggatgaagta |
| Y14051_Saur                 | aataatacta | ttgatgcaat | tgaagataaa | aatttcaaac | aagtttataa | agatagcagt | tataatttcta | aaagcgataa | tggatgaagta |
| Y00688_Saur                 | aataatacta | ttgatgcaat | tgaagataaa | aatttcaaac | aagtttataa | agatagcagt | tataatttcta | aaagcgataa | tggatgaagta |
| EU929080_Spseudin           | aataatacta | ttgatgcaat | tgaagataaa | aatttcaaac | aagtttataa | agatagcagt | tataatttcta | aaagcgataa | tggatgaagta |
| AM048807_Sklo_Scap          | aatgaaactg | ttgatgcaat | tgaagataaa | aatttcaaac | aagtttataa | agatagcact | tatcgttcta  | aaaatgataa | cggcgaagta  |
| AM048808_Sklo_cap_vit       | aatgaaactg | ttgatgcaat | tgaagataaa | aatttcaaac | aagtttataa | agatagcact | tatcgttcta  | aaaatgataa | cggcgaagta  |
| AB546780_Svit               | aatgaaactg | ttgatgcaat | tgaagataaa | aatttcaaac | aagtttataa | agatagcact | tatcgttcta  | aaaatgataa | cggcgaagta  |
| AY820253_Ssci               | aacgatcac  | tagatgccat | tgaagacaaa | aatgttaagc | aagtgttcaa | agatagtact | taccaatcta  | aaaatgataa | tggcgaagtg  |
| Y13052_Ssci                 | aacgaaacaa | ttgatgccat | tgaagataaa | aacgttaagc | aagtctttaa | aaatagtact | taccaatcta  | aaaacgataa | tggatgaagta |
| AB547235_Ssci               | aacgaaacaa | ttgatgccat | tgaagataaa | aacgttaagc | aagtcttcaa | aaatagtact | taccaatcta  | aaaacgataa | tggatgaagta |
| S. sciuri 09-LEM-1/3        | aacgaaacaa | ttgatgcaat | tgaagataaa | aacgttaaag | aagtctttaa | aaatagtact | tatcaatcta  | aaaatgataa | tggatgaagta |
| Y09223_Ssci                 | aacgaaacaa | ttgatgccat | tgaagataaa | aacgttaagc | aagtctttaa | aaatagtact | taccaatcta  | aaaacgataa | tggatgaagta |
| Y13094_Ssci                 | aacgaaacaa | ttgatgccat | tgaagataaa | aacgttaagc | aagtctttaa | aaatagtact | taccaatcta  | aaaacgataa | tggatgaagta |
| AB547236_Ssci               | aacgaaacaa | ttgatgccat | tgaagataaa | aacgttaagc | aagtctttaa | aaatagtact | taccaatcta  | aaaacgataa | tggatgaagta |
| FR821779_Saur_LGA251        | gagaaaacaa | ttagtcttat | tgaaaaagga | aactataacg | aagtatataa | aaatagttca | gaaaaatcta  | aactggcata | tggagaagaa  |
| FR823292_Saur_M10           | gagaaaacaa | ttagtcttat | tgaaaaagga | aactataacg | aagtatataa | aaatagttca | gaaaaatcta  | aactggcata | tggagaagaa  |

**Supplemental Table 3:** Alignments of known *mecA* alleles, continued

|                             | .... ....  | .... ....  | .... .... | .... ....  | .... ....  | .... ....  | .... ....  | .... ....  | .... ....  | .... .... |
|-----------------------------|------------|------------|-----------|------------|------------|------------|------------|------------|------------|-----------|
|                             | 185        | 195        | 205       | 215        | 225        | 235        | 245        | 255        | 265        |           |
| AB546267_Sfleur             | gaaatgactg | aacgtccgat | aaaaatata | aaaagttag  | gcgttaaaga | tataaacatt | caggaccgca | aaataaaaa  | aatatctaaa |           |
| Y13095_Ssci                 | gaaatgactg | aacgtccgat | aaaaatata | aatagtttag | gcgttaaaga | tataaacatt | caggatcgta | aaataaaaa  | agtatctaaa |           |
| AY786579_Saur               | gaaatgactg | aacgtccgat | aaaaatata | aatagtttag | gcgttaaaga | tataaacatt | caggatcgta | aaataaaaa  | agtatctaaa |           |
| ABSA01000066_Saur_epi       | gaaatgactg | aacgtccgat | aaaaatata | aatagtttag | gcgttaaaga | tataaacatt | caggatcgta | aaataaaaa  | agtatctaaa |           |
| GU235984_Saur               | gaaatgactg | aacgtccgat | aaaaatata | aatagtttag | gcgttaaaga | tataaacatt | caggatcgta | aaataaaaa  | agtatctaaa |           |
| EU929081_Spseudin           | gaaatgactg | aacgtccgat | aaaaatata | aatagtttag | gcgttaaaga | tataaacatt | caggatcgta | aaataaaaa  | agtatctaaa |           |
| GU370073_Saur_sap_vit_kloo. | gaaatgactg | aacgtccgat | aaaaatata | aatagtttag | gcgttaaaga | tataaacatt | caggatcgta | aaataaaaa  | agtatctaaa |           |
| AB037671_Saur               | gaaatgactg | aacgtccgat | aaaaatata | aatagtttag | gcgttaaaga | tataaacatt | caggatcgta | aaataaaaa  | agtatctaaa |           |
| GU235983_Saur               | gaaatgactg | aacgtccgat | aaaaatata | aatagtttag | gcgttaaaga | tataaacatt | caggatcgta | aaataaaaa  | agtatctaaa |           |
| AB221119_Saur               | gaaatgactg | aacgtccgat | aaaaatata | aatagtttag | gcgttaaaga | tataaacatt | caggatcgta | aaataaaaa  | agtatctaaa |           |
| FN433596_TW20_Saur_ST239    | gaaatgactg | aacgtccgat | aaaaatata | aatagtttag | gcgttaaaga | tataaacatt | caggatcgta | aaataaaaa  | agtatctaaa |           |
| BA000018_N315_Saur          | gaaatgactg | aacgtccgat | aaaaatata | aatagtttag | gcgttaaaga | tataaacatt | caggatcgta | aaataaaaa  | agtatctaaa |           |
| GQ902038_Saur_haem_pseud    | gaaatgactg | aacgtccgat | aaaaatata | aatagtttag | gcgttaaaga | tataaacatt | caggatcgta | aaataaaaa  | agtatctaaa |           |
| EU929082_Spseudin           | gaaatgactg | aacgtccgat | aaaaatata | aatagtttag | gcgttaaaga | tataaacatt | caggatcgta | aaataaaaa  | agtatctaaa |           |
| AB546266_Sfleur             | gaaatgactg | aacgtccgat | aaaaatata | aaaagttag  | gcgttaaaga | tataaacatt | caggatcgta | aaataaaaa  | agtatctaaa |           |
| AM048805_Scapi              | gaaatgactg | aacgtccgat | aaaaatata | aaaagttag  | gcgttaaaga | tataaacatt | caggatcgta | aaataaaaa  | agtatctaaa |           |
| EU929079_Spseudin           | gaaatgactg | aacgtccgat | aaaaatata | aatagtttag | gcgttaaaga | tataaacatt | caggatcgta | aaataaaaa  | agtatctaaa |           |
| GU227428_Saur               | gaaatgactg | aacgtccgat | aaaaatata | aatagtttag | gcgttaaaga | tataaacatt | caggatcgta | aaataaaaa  | agtatctaaa |           |
| Y14051_Saur                 | gaaatgactg | aacgtccgat | aaaaatata | aatagtttag | gcgttaaaga | tataaacatt | caggatcgta | aaataaaaa  | agtatctaaa |           |
| Y00688_Saur                 | gaaatgactg | aacgtccgat | aaaaatata | aatagtttag | gcgttaaaga | tataaacatt | caggatcgta | aaataaaaa  | agtatctaaa |           |
| EU929080_Spseudin           | gaaatgactg | aacgtccgat | aaaaatata | aatagtttag | gcgttaaaga | tataaacatt | caggatcgta | aaataaaaa  | agtatctaaa |           |
| AM048807_Sklo_Scap          | gaaatgactg | accgccgat  | aaaaattat | gaaagttag  | gcgttaaaga | tataaatatt | caggatcgta | aaataaagaa | agtatctaaa |           |
| AM048808_Sklo_cap_vit       | gaaatgactg | accgccgat  | aaaaattat | gaaagttag  | gcgttaaaga | tataaatatt | caggatcgta | aaataaagaa | agtatctaaa |           |
| AB546780_Svit               | gaaatgactg | accgccgat  | aaaaattat | gaaagttag  | gcgttaaaga | tataaatatt | caggatcgta | aaataaagaa | agtatctaaa |           |
| AY820253_Ssci               | gaaatgacag | accgccat   | taagattat | gacagtctag | gtgtcaaagc | tatcaacatt | aaagatcgtg | atatcaaaaa | ggtttcaaaa |           |
| Y13052_Ssci                 | gaaatgacag | accgccat   | taagattat | gacagtctcg | gtgtcaaaga | tatcaacatt | aaagatcgtg | atatcaaaaa | ggtttcaaaa |           |
| AB547235_Ssci               | gaaatgacag | accgccat   | taagattat | gacagtctcg | gcgtcaaaga | tatcaacatt | aaagatcgtg | atatcaaaaa | ggtttcaaaa |           |
| S. sciuri 09-LEM-1/3        | gaaatgacag | accgccat   | taagattac | gacagtctcg | gcgtcaaaga | tatcaacatt | aaagatcgtg | atatcaaaaa | ggtttcaaaa |           |
| Y09223_Ssci                 | gaaatgacag | accgccat   | taagattat | gacagtctcg | gcgtcaaaga | tatcaacatt | aaagatcgtg | atatcaaaaa | ggtttcgaaa |           |
| Y13094_Ssci                 | gaaatgacag | accgccat   | taagattat | gacagtctcg | gcgtcaaaga | tatcaacatt | aaagatcgtg | atatcaaaaa | ggtttcgaaa |           |
| AB547236_Ssci               | gaaatgacag | accgccat   | taagattat | gacagtctcg | gcgtcaaaga | tatcaacatt | aaagatcgtg | atatcaaaaa | ggtttcgaaa |           |
| FR821779_Saur_LGA251        | gaaattgtag | ataggaataa | aaaaattac | aaagatttaa | gtgtcaataa | cttaaaaatt | actaatcatg | aaattaaaaa | aactggaaaa |           |
| FR823292_Saur_M10           | gaaattgtag | ataggaataa | aaaaattac | aaagatttaa | gtgtcaataa | cttaaaaatt | actaatcatg | aaattaaaaa | aactggaaaa |           |

**Supplemental Table 3:** Alignments of known *mecA* alleles, continued

|                             | .... ....  | .... ....  | .... ....   | .... ....   | .... ....  | .... ....  | .... ....  | .... ....  | .... ....  |
|-----------------------------|------------|------------|-------------|-------------|------------|------------|------------|------------|------------|
|                             | 275        | 285        | 295         | 305         | 315        | 325        | 335        | 345        | 355        |
| AB546267_Sfleur             | aataaaaaa  | gagtagatgc | tcaatataaa  | attaaaacaa  | actacggtaa | cattgatcgc | aacgttcaat | ttaatTTTgt | taaagaagat |
| Y13095_Ssci                 | aataaaaaa  | gagtagatgc | tcaatataaa  | attaaaacaa  | actacggtaa | cattgatcgc | aacgttcaat | ttaatTTTgt | taaagaagat |
| AY786579_Saur               | aataaaaaa  | gagtagatgc | tcaatataaa  | attaaaacaa  | actacggtaa | cattgatcgc | aacgttcaat | ttaatTTTgt | taaagaagat |
| ABSA01000066_Saur_epi       | aataaaaaa  | gagtagatgc | tcaatataaa  | attaaaacaa  | actacggtaa | cattgatcgc | aacgttcaat | ttaatTTTgt | taaagaagat |
| GU235984_Saur               | aataaaaaa  | gagtagatgc | tcaatataaa  | attaaaacaa  | actacggtaa | cattgatcgc | aacgttcaat | ttaatTTTgt | taaagaagat |
| EU929081_Spseudin           | aataaaaaa  | gagtagatgc | tcaatataaa  | attaaaacaa  | actacggtaa | cattgatcgc | aacgttcaat | ttaatTTTgt | taaagaagat |
| GU370073_Saur_sap_vit_kloo. | aataaaaaa  | gagtagatgc | tcaatataaa  | attaaaacaa  | actacggtaa | cattgatcgc | aacgttcaat | ttaatTTTgt | taaagaagat |
| AB037671_Saur               | aataaaaaa  | gagtagatgc | tcaatataaa  | attaaaacaa  | actacggtaa | cattgatcgc | aacgttcaat | ttaatTTTgt | taaagaagat |
| GU235983_Saur               | aataaaaaa  | gagtagatgc | tcaatataaa  | attaaaacaa  | actacggtaa | cattgatcgc | aacgttcaat | ttaatTTTgt | taaagaagat |
| AB221119_Saur               | aataaaaaa  | gagtagatgc | tcaatataaa  | attaaaacaa  | actacggtaa | cattgatcgc | aacgttcaat | ttaatTTTgt | taaagaagat |
| FN433596_TW20_Saur_ST239    | aataaaaaa  | gagtagatgc | tcaatataaa  | attaaaacaa  | actacggtaa | cattgatcgc | aacgttcaat | ttaatTTTgt | taaagaagat |
| BA000018_N315_Saur          | aataaaaaa  | gagtagatgc | tcaatataaa  | attaaaacaa  | actacggtaa | cattgatcgc | aacgttcaat | ttaatTTTgt | taaagaagat |
| GQ902038_Saur_haem_pseud    | aataaaaaa  | gagtagatgc | tcaatataaa  | attaaaacaa  | actacggtaa | cattgatcgc | aacgttcaat | ttaatTTTgt | taaagaagat |
| EU929082_Spseudin           | aataaaaaa  | gagtagatgc | tcaatataaa  | attaaaacaa  | actacggtaa | cattgatcgc | aacgttcaat | ttaatTTTgt | taaagaagat |
| AB546266_Sfleur             | aataaaaaa  | gagtagatgc | tcaatataaa  | attaaaacaa  | actacggtaa | cattgatcgc | aacgttcaat | ttaatTTTgt | taaagaagat |
| AM048805_Scapi              | aataaaaaa  | gagtagatgc | tcaatataaa  | attaaaacaa  | actacggtaa | cattgatcgc | aacgttcaat | ttaatTTTgt | taaagaagat |
| EU929079_Spseudin           | aataaaaaa  | gagtagatgc | tcaatataaa  | attaaaacaa  | actacggtaa | cattgatcgc | aacgttcaat | ttaatTTTgt | taaagaagat |
| GU227428_Saur               | aataaaaaa  | gagtagatgc | tcaatataaa  | attaaaacaa  | actacggtaa | cattgatcgc | aacgttcaat | ttaatTTTgt | taaagaagat |
| Y14051_Saur                 | aataaaaaa  | gagtagatgc | tcaatataaa  | attaaaacaa  | actacggtaa | cattgatcgc | aacgttcaat | ttaatTTTgt | taaagaagat |
| Y00688_Saur                 | aataaaaaa  | gagtagatgc | tcaatataaa  | attaaaacaa  | actacggtaa | cattgatcgc | aacgttcaat | ttaatTTTgt | taaagaagat |
| EU929080_Spseudin           | aataaaaaa  | gagtagatgc | tcaatataaa  | attaaaacaa  | actacggtaa | cattgatcgc | aacgttcaat | ttaatTTTgt | taaagaagat |
| AM048807_Sklo_Scap          | aataaaaaa  | aagttgatgc | tcaatataaa  | ctcaaaacaa  | actacggta  | catcgaccgc | aatgttcgat | ttaatTTcgt | taaagaagat |
| AM048808_Sklo_cap_vit       | aataaaaaa  | aagttgatgc | tcaatataaa  | ctcaaaacaa  | actacggta  | catcgaccgc | aatgttcgat | ttaatTTcgt | taaagaagat |
| AB546780_Svit               | aataaaaaa  | aagttgatgc | tcaatataaa  | atcaaaacaa  | actacggta  | catcgaccgc | aatgttcgat | ttaatTTcgt | taaagaagat |
| AY820253_Ssci               | aacaaaaaa  | aagtcactgc | aaaatatgaa  | ctgcaaacaa  | attacggcaa | aattaatcgt | gacgttaaat | taaactttat | taaagaagat |
| Y13052_Ssci                 | aacaaaaaa  | aagtcacagc | aaaatatgaa  | cttcaaacga  | attacggcaa | aattaatcgc | gacgttaaat | taaactttat | taaagaagat |
| AB547235_Ssci               | gacaaaaagc | aagtcacagc | aaaatatgaa  | cttcaaacga  | attacggcaa | aattaatcgc | gacgttaaat | taaactttat | taaagaagat |
| S. sciuri 09-LEM-1/3        | gacaaaaagc | aagtcacagc | aaaatatgaa  | cttcaaacga  | attacggcaa | aattaatcgc | gacgtgaaat | taaactttat | taaagaagat |
| Y09223_Ssci                 | aacaaaaaa  | aagtcacagc | aaagtatgaa  | cttcaaacga  | attacggcaa | aattaatcgt | gacgttaaat | taaactttat | taaagaagat |
| Y13094_Ssci                 | aacaaaaagc | aagtcacagc | aaagtatgaa  | ctgcaaacga  | attacggcaa | aattaatcat | gacgttaaat | taaactttat | taaagaagat |
| AB547236_Ssci               | aacaaaaagc | aagtcacagc | aaagtatgaa  | ctgcaaacga  | attacggcaa | aattaatcgt | gacgttaaat | taaactttat | taaagaagat |
| FR821779_Saur_LGA251        | gataaaaaa  | aagttgatgt | taaataataac | atataatacaa | aatatggaac | tatacgacgt | aatacacaat | taaactttat | ttatgaagat |
| FR823292_Saur_M10           | gataaaaaa  | aagttgatgt | taaataataac | atataatacaa | aatatggaac | tatacgacgt | aatacacaat | taaactttat | ttatgaagat |

**Supplemental Table 3:** Alignments of known *mecA* alleles, continued

|                             | .... ....  | .... ....  | .... ....  | .... ....  | .... ....  | .... ....  | .... ....  | .... ....  | .... .... | .... ....  |
|-----------------------------|------------|------------|------------|------------|------------|------------|------------|------------|-----------|------------|
|                             | 365        | 375        | 385        | 395        | 405        | 415        | 425        | 435        | 445       |            |
| AB546267_Sfleur             | ggcatgtgga | aattagattg | ggatcatagc | gtcattattc | caggaatgca | gaaagaccaa | agcatacata | ttgaaaat   | ttt       | aaaatcagaa |
| Y13095_Ssci                 | ggtatgtgga | agttagattg | ggatcatagc | gtcattattc | caggaatgca | gaaagaccaa | agcatacata | ttgaaaat   | ttt       | aaaatcagaa |
| AY786579_Saur               | ggtatgtgga | agttagattg | ggatcatagc | gtcattattc | caggaatgca | gaaagaccaa | agcatacata | ttgaaaat   | ttt       | aaaatcagaa |
| ABSA01000066_Saur_epi       | ggtatgtgga | agttagattg | ggatcatagc | gtcattattc | caggaatgca | gaaagaccaa | agcatacata | ttgaaaat   | ttt       | aaaatcagaa |
| GU235984_Saur               | ggtatgtgga | agttagattg | ggatcatagc | gtcattattc | caggaatgca | gaaagaccaa | agcatacata | ttgaaaat   | ttt       | aaaatcagaa |
| EU929081_Spseudin           | ggtatgtgga | agttagattg | ggatcatagc | gtcattattc | caggaatgca | gaaagaccaa | agcatacata | ttgaaaat   | ttt       | aaaatcagaa |
| GU370073_Saur_sap_vit_kloo. | ggtatgtgga | agttagattg | ggatcatagc | gtcattattc | caggaatgca | gaaagaccaa | agcatacata | ttgaaaat   | ttt       | aaaatcagaa |
| AB037671_Saur               | ggtatgtgga | agttagattg | ggatcatagc | gtcattattc | caggaatgca | gaaagaccaa | agcatacata | ttgaaaat   | ttt       | aaaatcagaa |
| GU235983_Saur               | ggtatgtgga | agttagattg | ggatcatagc | gtcattattc | caggaatgca | gaaagaccaa | agcatacata | ttgaaaat   | ttt       | aaaatcaaaa |
| AB221119_Saur               | ggtatgtgga | agttagattg | ggatcatagc | gtcattattc | caggaatgca | gaaagaccaa | agcatacata | ttgaaaaat  |           | aaaatcagaa |
| FN433596_TW20_Saur_ST239    | ggtatgtgga | agttagattg | ggatcatagc | gtcattattc | caggaatgca | gaaagaccaa | agcatacata | ttgaaaaat  |           | aaaatcagaa |
| BA000018_N315_Saur          | ggtatgtgga | agttagattg | ggatcatagc | gtcattattc | caggaatgca | gaaagaccaa | agcatacata | ttgaaaat   | ttt       | aaaatcagaa |
| GQ902038_Saur_haem_pseud    | ggtatgtgga | agttagattg | ggatcatagc | gtcattattc | caggaatgca | gaaagaccaa | agcatacata | ttgaaaat   | ttt       | aaaatcagaa |
| EU929082_Spseudin           | ggtatgtgga | agttagattg | ggatcatagc | gtcattattc | caggaatgca | gaaagaccaa | agcatacata | ttgaaaat   | ttt       | aaaatcagaa |
| AB546266_Sfleur             | ggtatgtgga | agttagattg | ggatcatagc | gtcattattc | caggaatgca | gaaagaccaa | agcatacata | ttgaaaat   | ttt       | aaaatcagaa |
| AM048805_Scapi              | ggtatgtgga | agttagattg | gaatcatagc | gtcattattc | caggaatgca | gaaagaccaa | agcatacata | ttgaaaat   | ttt       | aaaatcagaa |
| EU929079_Spseudin           | ggtatgtgga | agttagattg | ggatcatagc | gtcattattc | caggaatgca | gaaagaccaa | agcatacata | ttgaaaat   | ttt       | aaaatcagaa |
| GU227428_Saur               | ggtatgtgga | agttagattg | ggatcatagc | gtcattattc | caggaatgca | gaaagaccaa | agcatacata | ttgaaaat   | ttt       | aaaatcagaa |
| Y14051_Saur                 | ggtatgtgga | agttagattg | ggatcatagc | gtcattattc | caggaatgca | gaaagaccaa | agcatacata | ttgaaaat   | ttt       | aaaatcagaa |
| Y00688_Saur                 | ggtatgtgga | agttagattg | ggatcatagc | gtcattattc | caggaatgca | gaaagaccaa | agcatacata | ttgaaaat   | ttt       | aaaatcagaa |
| EU929080_Spseudin           | ggtatgtgga | agttagattg | ggatcatagc | gtcattattc | caggaatgca | gaaagaccaa | agcatacata | ttgaaaat   | ttt       | aaaatcagaa |
| AM048807_Sklo_Scap          | ggtaaatgga | aattagattg | gaatcaaagc | gtcattattc | cagacatgca | gaaagatcaa | agcattcata | tccaaccagt |           | taagtcggaa |
| AM048808_Sklo_cap_vit       | ggtaaatgga | aattagattg | gaatcaaagc | gtcattattc | cagacatgca | gaaagatcaa | agcattcata | tccaaccagt |           | taagtcggaa |
| AB546780_Svit               | ggtaaatgga | aattagattg | gaatcaaagc | gtcattattc | cagacatgca | gaaagatcaa | agcattcata | tccaaccagt |           | taagtcggaa |
| AY820253_Ssci               | aaagattgga | aattgattg  | gaatcaaagt | gtcatcattc | caggcatgca | gaaaaatcaa | tccatcaata | ttgaaccatt |           | gaaatcagaa |
| Y13052_Ssci                 | aaagattgga | aattggattg | gaatcaaagt | gtcattattc | caggcatgaa | gaaaaatcaa | tctatcaata | ttgaaccatt |           | gaaatcagaa |
| AB547235_Ssci               | aaagattgga | aattggattg | gaatcaaagt | gtcattattc | caggcatgaa | gaaaaatcaa | tctatcaata | ttgaaccatt |           | gaaatcagaa |
| S. sciuri 09-LEM-1/3        | aaagattgga | aattggattg | gaatcaaagt | gtcattattc | caggcatgga | gaaaaatcaa | tccatcaata | ttgaaccatt |           | gaaatcagaa |
| Y09223_Ssci                 | aaagattgga | aattggattg | gaatcaaat  | gccattattc | caggcatgaa | gaaaaatcaa | tccatcaata | ttgaaccatt |           | gaaatcagaa |
| Y13094_Ssci                 | aaagattgga | aattggattg | gaatcaaagt | gtcattattc | caggcatgaa | gaaaaatcaa | tccatcaata | ttgaaccatt |           | gaaatcagaa |
| AB547236_Ssci               | aaagattgga | aattggattg | gaatcaaagt | gtcattattc | caggcatgaa | gaaaaatcaa | tccatcaata | ttgaaccatt |           | gaaatcagaa |
| FR821779_Saur_LGA251        | aagcattgga | aattagattg | gagaccagac | gtaatagtac | ctggtttgaa | aaatggacag | aaaattaata | tagaaacatt |           | aaaatcagag |
| FR823292_Saur_M10           | aagcattgga | aattagattg | gagaccagac | gtaatagtac | ctggtttgaa | aaatggacag | aaaattaata | tagaaacatt |           | aaaatcagag |

**Supplemental Table 3:** Alignments of known *mecA* alleles, continued

|                             | .... ....  | .... ....  | .... ....  | .... ....  | .... ....  | .... ....  | .... ....  | .... ....  | .... ....  | .... .... | .... .... | .... .... |
|-----------------------------|------------|------------|------------|------------|------------|------------|------------|------------|------------|-----------|-----------|-----------|
|                             | 455        | 465        | 475        | 485        | 495        | 505        | 515        | 525        | 535        |           |           |           |
| AB546267_Sfleur             | cgtggtaaaa | ttttagaccg | aaacaatgtg | gaattggcca | atacaggaac | agcatatgag | a-taggcac  | gttccaaaga | gtgtatctaa |           |           |           |
| Y13095_Ssci                 | cgtggtaaaa | ttttagaccg | aaacaatgtg | gaattggcca | atacaggaac | agcatatgag | a-taggcac  | gttccaaaga | atgtatctaa |           |           |           |
| AY786579_Saur               | cgtggtaaaa | ttttagaccg | aaacaatgtg | gaattggcca | atacaggaac | agcatatgag | a-taggcac  | gttccaaaga | atgtatctaa |           |           |           |
| ABSA01000066_Saur_epi       | cgtggtaaaa | ttttagaccg | aaacaatgtg | gaattggcca | atacaggaac | agcatatgag | a-taggcac  | gttccaaaga | atgtatctaa |           |           |           |
| GU235984_Saur               | cgtggtaaaa | ttttagaccg | aaacaatgtg | gaattggcca | atacaggaac | agcatatgag | a-taggcac  | gttccaaaga | atgtatctaa |           |           |           |
| EU929081_Spseudin           | cgtggtaaaa | ttttagaccg | aaacaatgtg | gaattggcca | atacaggaac | agcatatgag | a-taggcac  | gttccaaaga | atgtatctaa |           |           |           |
| GU370073_Saur_sap_vit_kloo. | cgtggtaaaa | ttttagaccg | aaacaatgtg | gaattggcca | atacaggaac | agcatatgag | a-taggcac  | gttccaaaga | atgtatctaa |           |           |           |
| AB037671_Saur               | cgtggtaaaa | ttttagaccg | aaacaatgtg | gaattggcca | atacaggaac | agcatatgag | a-taggcac  | gttccaaaga | atgtatctaa |           |           |           |
| GU235983_Saur               | cgtggtaaaa | ttttagaccg | aaacaatgtg | gaattggcca | atacaggaac | agcatatgag | a-taggcac  | gttccaaaga | atgtatctaa |           |           |           |
| AB221119_Saur               | cgtggtaaaa | ttttagaccg | aaacaatgtg | gaattggcca | atacaggaac | agcatatgag | a-taggcac  | gttccaaaga | atgtatctaa |           |           |           |
| FN433596_TW20_Saur_ST239    | cgtggtaaaa | ttttagaccg | aaacaatgtg | gaattggcca | atacaggaac | agcatatgag | a-taggcac  | gttccaaaga | atgtatctaa |           |           |           |
| BA000018_N315_Saur          | cgtggtaaaa | ttttagaccg | aaacaatgtg | gaattggcca | atacaggaac | agcatatgag | a-taggcac  | gttccaaaga | atgtatctaa |           |           |           |
| GQ902038_Saur_haem_pseud    | cgtggtaaaa | ttttagaccg | aaacaatgtg | gaattggcca | atacaggaac | agcatatgag | a-taggcac  | gttccaaaga | atgtatctaa |           |           |           |
| EU929082_Spseudin           | cgtggtaaaa | ttttagaccg | aaacaatgtg | gaattggcca | atacaggaac | agcatatgag | a-taggcac  | gttccaaaga | atgtatctaa |           |           |           |
| AB546266_Sfleur             | cgtggtaaaa | ttttagaccg | aaacaatgtg | gaattggcca | atacaggaac | agcatatgag | a-taggcac  | gttccaaaga | atgtatctaa |           |           |           |
| AM048805_Scapi              | cgtggtaaaa | ttttagaccg | aaacaatgtg | gaattggcca | atacaggaac | agcatatgag | a-taggcac  | gttccaaaga | atgtatctaa |           |           |           |
| EU929079_Spseudin           | cgtggtaaaa | ttttagaccg | aaacaatgtg | gaattggcca | atacaggaac | agcatatgag | a-taggcac  | gttccaaaga | atgtatctaa |           |           |           |
| GU227428_Saur               | cgtggtaaaa | ttttagaccg | aaacaatgtg | gaattggcca | atacaggaac | a-catatgag | attaggcac  | gttccaaaga | atgtatctaa |           |           |           |
| Y14051_Saur                 | cgtggtaaaa | ttttagaccg | aaacaatgtg | gaattggcca | atacaggaac | a-catatgag | attaggcac  | gttccaaaga | atgtatctaa |           |           |           |
| Y00688_Saur                 | cgtggtaaaa | ttttagaccg | aaacaatgtg | gaattggcca | atacaggaac | a-catatgag | attaggcac  | gttccaaaga | atgtatctaa |           |           |           |
| EU929080_Spseudin           | cgtggtaaaa | ttttagaccg | aaacaatgtg | gaattggcca | atacaggaac | a-catatgag | attaggcac  | gttccaaaga | atgtatctaa |           |           |           |
| AM048807_Sklo_Scap          | cgcggtaaaa | ttttagacag | aaacaacgta | gaattggcca | atacaggaac | agcacatgag | a-taggcatt | gttccaacga | gtgtgtctaa |           |           |           |
| AM048808_Sklo_cap_vit       | cgcggtaaaa | ttttagacag | aaacaacgta | gaattggcca | atacaggaac | agcacatgag | a-taggcatt | gttccaacga | gtgtgtctaa |           |           |           |
| AB546780_Svit               | cgcggtaaaa | ttttagacag | aaacaacgta | gaattggcca | atacaggaac | agcacatgag | a-taggcatt | gttccaacga | gtgtgtctaa |           |           |           |
| AY820253_Ssci               | cgaggtaaga | ttttagaccg | aaataatgta | gaattagcca | ctacaggaac | agcacatgaa | g-ttggcatt | gttcctaata | atgtttcgac |           |           |           |
| Y13052_Ssci                 | cgaggtaaga | ttttagaccg | aaacaatgta | gagttagcca | ctacaggaac | agcacatgaa | g-ttggcatt | gttcctaata | atgtttcgac |           |           |           |
| AB547235_Ssci               | cgaggtaaga | ttttagaccg | aaacaatgta | gagttagcca | ctacaggaac | agcacatgaa | g-ttggcatt | gttcctaata | atgtttcgac |           |           |           |
| S. sciuri 09-LEM-1/3        | cgaggtaaga | ttttagaccg | aaacaatgta | gaattagcca | ctacaggaac | agcacatgaa | g-ttggcatt | gttcctaata | atgtttcgac |           |           |           |
| Y09223_Ssci                 | cgaggtaaga | ttttagacag | gaacaatgta | gagttagcca | ctacaggaac | aacacatgaa | g-ttggatt  | gttcctaata | atgtttccac |           |           |           |
| Y13094_Ssci                 | cgtggtaaga | ttttagaccg | aaacaatgta | gagttagcca | ctacaggaac | agcacatgaa | g-ttggatt  | gttcctaata | atgtttccac |           |           |           |
| AB547236_Ssci               | cgtggtaaga | ttttagaccg | aaacaatgta | gagttagcca | ctacaggaac | agcacatgaa | g-ttggatt  | gttcctaata | atgtttccac |           |           |           |
| FR821779_Saur_LGA251        | cgaggcaaaa | taaaagatag | aaatggtata | gaattagcta | aaactggaaa | tacatatgaa | a-tcggatt  | gtccctaaca | aaacacccaa |           |           |           |
| FR823292_Saur_M10           | cgaggcaaaa | taaaagatag | aaatggtata | gaattagcta | aaactggaaa | tacatatgaa | a-tcggatt  | gtccctaaca | aaacacccaa |           |           |           |

**Supplemental Table 3:** Alignments of known *mecA* alleles, continued

|                             | .... ....  | .... ....  | .... ....  | .... ....  | .... ....  | .... ....  | .... ....  | .... ....  | .... ....  |
|-----------------------------|------------|------------|------------|------------|------------|------------|------------|------------|------------|
|                             | 545        | 555        | 565        | 575        | 585        | 595        | 605        | 615        | 625        |
| AB546267_Sfleur             | aaaagattat | aaagcaatcg | ctaaagaact | aagtatttct | gaagactata | tcaaacaaca | aatggatcaa | aattgggtac | aagatgatac |
| Y13095_Ssci                 | aaaagattat | aaagccatcg | ctaaagaact | aagtatttct | gaagactata | tcaaacaaca | aatggatcaa | aattgggtac | aagatgatac |
| AY786579_Saur               | aaaagattat | aaagcaatcg | ctaaagaact | aagtatttct | gaagactata | tcaaacaaca | aatggatcaa | aattgggtac | aagatgatac |
| ABSA01000066_Saur_epi       | aaaagattat | aaagcaatcg | ctaaagaact | aagtatttct | gaagactata | tcaaacaaca | aatggatcaa | aattgggtac | aagatgatac |
| GU235984_Saur               | aaaagattat | aaagcaatcg | ctaaagaact | aagtatttct | gaagactata | tcaaacaaca | aatggatcaa | aattgggtac | aagatgatac |
| EU929081_Spseudin           | aaaagattat | aaagcaatcg | ctaaagaact | aagtatttct | gaagactata | tcaaacaaca | aatggatcaa | aattgggtac | aagatgatac |
| GU370073_Saur_sap_vit_kloo. | aaaagattat | aaagcaatcg | ctaaagaact | aagtatttct | gaagactata | tcaaacaaca | aatggatcaa | aattgggtac | aagatgatac |
| AB037671_Saur               | aaaagattat | aaagcaatcg | ctaaagaact | aagtatttct | gaagactata | tcaaacaaca | aatggatcaa | aagtgggtac | aagatgatac |
| GU235983_Saur               | aaaagattat | aaagcaatcg | ctaaagaact | aagtatttct | gaagactata | tcaaacaaca | aatggatcaa | aagtgggtac | aagatgatac |
| AB221119_Saur               | aaaagattat | aaagcaatcg | ctaaagaact | aagtatttct | gaagactata | tcaaacaaca | aatggatcaa | aattgggtac | aagatgatac |
| FN433596_TW20_Saur_ST239    | aaaagattat | aaagcaatcg | ctaaagaact | aagtatttct | gaagactata | tcaaacaaca | aatggatcaa | aagtgggtac | aagatgatac |
| BA000018_N315_Saur          | aaaagattat | aaagcaatcg | ctaaagaact | aagtatttct | gaagactata | tcaaacaaca | aatggatcaa | aattgggtac | aagatgatac |
| GQ902038_Saur_haem_pseud    | aaaagattat | aaagcaatcg | ctaaagaact | aagtatttct | gaagactata | tcaaacaaca | aatggatcaa | aattgggtac | aagatgatac |
| EU929082_Spseudin           | aaaagattat | aaagcaatcg | ctaaagaact | aagtatttct | gaagactata | tcaaacaaca | aatggatcaa | aattgggtac | aagatgatac |
| AB546266_Sfleur             | aaaagattat | aaagcaatcg | ctaaagaact | aagtatttct | gaagactata | tcaaacaaca | aatggatcaa | aattgggtac | aagatgatac |
| AM048805_Scapi              | aaaagattat | aaagcaatcg | ctaaagaact | aagtatttct | gaagactata | tcaaacaaca | aatggatcaa | aattgggtac | aagatgatac |
| EU929079_Spseudin           | aaaagattat | aaagcaatcg | ctaaagaact | aagtatttct | gaagactata | tcaaacaaca | aatggatcaa | aattgggtac | aagatgatac |
| GU227428_Saur               | aaaagattat | aaagcaatcg | ctaaagaact | aagtatttct | gaagactata | tc-aacaaca | aatggatcaa | aattgggtac | aagatgatac |
| Y14051_Saur                 | aaaagattat | aaagcaatcg | ctaaagaact | aagtatttct | gaagactata | tc-aacaaca | aatggatcaa | aattgggtac | aagatgatac |
| Y00688_Saur                 | aaaagattat | aaagcaatcg | ctaaagaact | aagtatttct | gaagactata | tc-aacaaca | aatggatcaa | aattgggtac | aagatgatac |
| EU929080_Spseudin           | aaaagattat | aaagcaatcg | ctaaagaact | aagtatttct | gaagactata | tc-aacaaca | aatggatcaa | aattgggtac | aagatgatac |
| AM048807_Sklo_Scap          | agaagactat | aaagcaatcg | ctcaaaaact | aagtatttca | gaaggtcata | ttaaccaaca | aatgaaccaa | gattgggttc | aagatgatac |
| AM048808_Sklo_cap_vit       | agaagactat | aaagcaatcg | ctcaaaaact | aagtatttca | gaaggtcata | ttaaccaaca | aatgaaccaa | gattgggttc | aagatgatac |
| AB546780_Svit               | agaagactat | aaagcaatcg | ctcaaaaact | aagtatttca | gaagatcata | ttaaccaaca | aatgaaccaa | gattgggttc | aagatgatac |
| AY820253_Ssci               | aagtgattac | aaagcaatcg | ctgaaaaatt | agaccttca  | gaatcgtata | ttaacaaca  | agctgaacag | gattgggtta | aagatgatac |
| Y13052_Ssci                 | aatgattat  | aaagcaatcg | ctgaaaaatt | agaccttca  | gaatcgtaca | ttaacaaca  | aacagaacag | gactgggtta | aagatgatac |
| AB547235_Ssci               | aatgattat  | aaagcaatcg | ctgaaaaatt | agaccttca  | gaatcgtaca | ttaacaaca  | aacagaacag | gactgggtta | aagatgatac |
| S. sciuri 09-LEM-1/3        | aagtgattac | aaagcaatcg | ctgaaaaatt | agaccttca  | gaatcgtaca | ttaacaaca  | aactgaacag | gactgggtta | aagatgatac |
| Y09223_Ssci                 | aagtgattac | aaagcaatcg | ctgaaaagt  | agaccttca  | gaatcgtata | ttaaacagca | aacagaacag | gattgggtta | aagatgatac |
| Y13094_Ssci                 | aagtgattac | aaagcaatcg | ctgaaaagt  | agaccttca  | gaatcgtata | ttaacaaca  | aacagaacag | gattgggtta | aagatgatac |
| AB547236_Ssci               | aagtgattac | aaagcaatcg | ctgaaaagt  | agaccttca  | gaatcgtata | ttaacaaca  | aacagaacag | gattgggtta | aagatgatac |
| FR821779_Saur_LGA251        | agaaaaatat | gatgatattg | ctcgtgactt | acaaattgat | acaaaagcta | taaccaataa | agttaatcaa | aaatgggttc | agccagattc |
| FR823292_Saur_M10           | agaaaaatat | gatgatattg | ctcgtgactt | acaaattgat | acaaaagcta | taaccaataa | agttaatcaa | aaatgggttc | agccagattc |



**Supplemental Table 3:** Alignments of known *mecA* alleles, continued

|                             | .... .... | .... .... | .... .... | .... .... | .... ....  | .... .... | .... .... | .... .... | .... .... |            |        |       |        |           |            |
|-----------------------------|-----------|-----------|-----------|-----------|------------|-----------|-----------|-----------|-----------|------------|--------|-------|--------|-----------|------------|
|                             | 635       | 645       | 655       | 665       | 675        | 685       | 695       | 705       | 715       |            |        |       |        |           |            |
| AB546267_Sfleur             | cttcg     | ttcca     | c-ttaaa   | acc       | gttaaaaa   | tgga      | gaaga     | tttaagt   | gat       | ttcgcaaaa  | aatttc | catct | tacaac | taac      | gaaacagaaa |
| Y13095_Ssci                 | cttcg     | ttcca     | c-ttaaa   | acc       | gttaaaaa   | tgga      | gaata     | tttaagt   | gat       | ttcgcaaaa  | aatttc | catct | tacaac | taat      | gaaacagaaa |
| AY786579_Saur               | cttcg     | ttcca     | c-ttaaa   | acc       | gttaaaaa   | tgga      | gaata     | tttaagt   | gat       | ttcgcaaaa  | aatttc | catct | tacaac | taat      | gaaacagaaa |
| ABSA01000066_Saur_epi       | cttcg     | ttcca     | c-ttaaa   | acc       | gttaaaaa   | tgga      | gaata     | tttaagt   | gat       | ttcgcaaaa  | aatttc | catct | tacaac | taat      | gaaacagaaa |
| GU235984_Saur               | cttcg     | ttcca     | c-ttaaa   | acc       | gttaaaaa   | tgga      | gaata     | tttaagt   | gat       | ttcgcaaaa  | aatttc | catct | tacaac | taat      | gaaacagaaa |
| EU929081_Spseudin           | cttcg     | ttcca     | c-ttaaa   | acc       | gttaaaaa   | tgga      | gaata     | tttaagt   | gat       | ttcgcaaaa  | aatttc | catct | tacaac | taat      | gaaacagaaa |
| GU370073_Saur_sap_vit_kloo. | cttcg     | ttcca     | c-ttaaa   | acc       | gttaaaaa   | tgga      | gaata     | tttaagt   | gat       | ttcgcaaaa  | aatttc | catct | tacaac | taat      | gaaacagaaa |
| AB037671_Saur               | cttcg     | ttcca     | c-ttaaa   | acc       | gttaaaaa   | tgga      | gaata     | tttaagt   | gat       | ttcgcaaaa  | aatttc | catct | tacaac | taat      | gaaacagaaa |
| GU235983_Saur               | cttcg     | ttcca     | c-ttaaa   | acc       | gttaaaaa   | tgga      | gaata     | tttaagt   | gat       | ttcgcaaaa  | aatttc | catct | tacaac | taat      | gaaacagaaa |
| AB221119_Saur               | cttcg     | ttcca     | c-ttaaa   | acc       | gttaaaaa   | tgga      | gaata     | tttaagt   | gat       | ttcgcaaaa  | aatttc | catct | tacaac | taat      | gaaacagaaa |
| FN433596_TW20_Saur_ST239    | cttcg     | ttcca     | c-ttaaa   | acc       | gttaaaaa   | tgga      | gaata     | tttaagt   | gat       | ttcgcaaaa  | aatttc | catct | tacaac | taat      | gaaacagaaa |
| BA000018_N315_Saur          | cttcg     | ttcca     | c-ttaaa   | acc       | gttaaaaa   | tgga      | gaata     | tttaagt   | gat       | ttcgcaaaa  | aatttc | catct | tacaac | taat      | gaaacagaaa |
| GQ902038_Saur_haem_pseud    | cttcg     | ttcca     | c-ttaaa   | acc       | gttaaaaa   | tgga      | gaata     | tttaagag  | at        | ttcgcaaaa  | aatttc | catct | tacaac | taat      | gaaacagaaa |
| EU929082_Spseudin           | cttcg     | ttcca     | c-ttaaa   | acc       | gttaaaaa   | tgga      | gaata     | tttaagt   | gat       | ttcgcaaaa  | aatttc | catct | tacaac | taat      | gaaacagaaa |
| AB546266_Sfleur             | cttcg     | ttcca     | c-ttaaa   | acc       | gttaaaaa   | tgga      | gaaga     | tttaagt   | gat       | ttcgcaaaa  | aatttc | catct | tacaac | taat      | gaaacagaaa |
| AM048805_Scapi              | cttcg     | ttcca     | c-ttaaa   | acc       | gttaaaaa   | tgga      | gaaga     | tttaagt   | gat       | ttcgcaaaa  | aatttc | catct | tacaac | taat      | gaaacagaaa |
| EU929079_Spseudin           | cttcg     | ttcca     | c-ttaaa   | acc       | gttaaaaa   | tgga      | gaata     | tttaagag  | at        | ttcgcaaaa  | aatttc | catct | tacaac | taat      | gaaacagaaa |
| GU227428_Saur               | cttcg     | ttcca     | ctttaaa   | acc       | gttaaaaa   | tgga      | gaata     | tttaagt   | gat       | ttcgcaaaa  | aatttc | catct | tacaac | taat      | gaaacagaaa |
| Y14051_Saur                 | cttcg     | ttcca     | ctttaaa   | acc       | gttaaaaa   | tgga      | gaata     | tttaagt   | gat       | ttcgcaaaa  | aatttc | catct | tacaac | taat      | gaaacagaaa |
| Y00688_Saur                 | cttcg     | ttcca     | ctttaaa   | acc       | gttaaaaa   | tgga      | gaata     | tttaagt   | gat       | ttcgcaaaa  | aatttc | catct | tacaac | taat      | gaaacagaaa |
| EU929080_Spseudin           | cttcg     | ttcca     | ctttaaa   | acc       | gttaaaaa   | tgga      | gaata     | tttaagt   | gat       | ttcgcaaaa  | aatttc | catct | tacaac | taat      | gaaacagaaa |
| AM048807_Sklo_Scap          | attcg     | ttcca     | c-ttaag   | acc       | gttaaaaca  | tgga      | taaaga    | tttaagt   | gat       | ttcgtaaaa  | aacat  | catct | tacaac | taat      | gaaacagaaa |
| AM048808_Sklo_cap_vit       | attcg     | ttcca     | c-ttaag   | acc       | gttaaaaca  | tgga      | taaaga    | tttaagt   | gat       | ttcgtaaaa  | aacat  | catct | tacaac | taat      | gaaacagaaa |
| AB546780_Svit               | attcg     | ttcca     | c-ttaag   | acc       | gttaaaaca  | tgga      | taaaga    | tttaagt   | gat       | ttcgtaaaa  | aacat  | catct | tacaac | taat      | gaaacagaaa |
| AY820253_Ssci               | attcg     | tcctt     | c-tcaag   | act       | gttcaaaa   | tgaat     | caaga     | cacaaag   | cgt       | tttgttgaaa | agtat  | catct | cacaac | acaa      | gaaacagaaa |
| Y13052_Ssci                 | attcg     | tcctt     | c-ttaag   | act       | gttcaaaa   | tgaat     | caaga     | tacaaga   | aat       | tttgttgaga | agtat  | catct | cacaac | acaa      | gaaacagaaa |
| AB547235_Ssci               | attcg     | tcctt     | c-ttaag   | act       | gttcaaaa   | tgaat     | caaga     | tacaaga   | aat       | tttgttgaga | agtat  | catct | cacaac | acaa      | gaaacagaaa |
| S. sciuri 09-LEM-1/3        | attcat    | tcctt     | c-ttaag   | act       | gttcaaaa   | tgaat     | caaga     | tacaaga   | aat       | tttgttgaaa | agtat  | catct | cacaac | acaa      | gaaacagaaa |
| Y09223_Ssci                 | attcg     | tcctt     | c-tcaag   | act       | gttcaagata | tgaat     | caaga     | tttaaga   | aat       | tttgttgaaa | agtat  | catct | cacat  | cacag     | gaaacagaaa |
| Y13094_Ssci                 | attcg     | tcctt     | c-tcaag   | act       | gttcaagata | tgaat     | caaga     | tttaaga   | aat       | tttgttgaaa | agtat  | catct | cacat  | cacag     | gaaacagaaa |
| AB547236_Ssci               | attcg     | tcctt     | c-tcaag   | act       | gttcaagata | tgaat     | caaga     | tttaaga   | aat       | tttgttgaaa | agtat  | catct | cacat  | cacag     | gaaacagaaa |
| FR821779_Saur_LGA251        | atttg     | tacca     | a-ttaaaa  | aag       | ataaataaac | aagat     | gaata     | tatagac   | aaa       | ttaattaaat | cataca | at    | ttt    | acaataaac | actataaaaa |
| FR823292_Saur_M10           | atttg     | tacca     | a-ttaaaa  | aag       | ataaataaac | aagat     | gaata     | tatagac   | aaa       | ttaattaaat | cataca | at    | ttt    | acaataaac | actataaaaa |

**Supplemental Table 3:** Alignments of known *mecA* alleles, continued

|                             | .... ....           | .... ....           | .... ....           | .... ....           | .... ....           | .... ....           | .... ....           | .... ....           | .... ....                    |
|-----------------------------|---------------------|---------------------|---------------------|---------------------|---------------------|---------------------|---------------------|---------------------|------------------------------|
|                             | 725                 | 735                 | 745                 | 755                 | 765                 | 775                 | 785                 | 795                 | 805                          |
| AB546267_Sfleur             | gtcgt <b>aa</b> cta | tcctc <b>ta</b> gaa | gaagc <b>ga</b> ctt | cacat <b>ct</b> att | agg <b>ttat</b> gtt | ggt <b>ccc</b> atta | act <b>ct</b> gaaga | att <b>aaa</b> caa  | aa <b>ga</b> atata           |
| Y13095_Ssci                 | gtcgt <b>aa</b> cta | tcctc <b>ta</b> gaa | aaagc <b>ga</b> ctt | cacat <b>ct</b> att | agg <b>ttat</b> gtt | ggt <b>ccc</b> atta | act <b>ct</b> gaaga | att <b>aaa</b> caa  | aa <b>ga</b> atata           |
| AY786579_Saur               | gtcgt <b>aa</b> cta | tcctc <b>ta</b> gga | aaagc <b>ga</b> ctt | cacat <b>ct</b> att | agg <b>ttat</b> gtt | ggt <b>ccc</b> atta | act <b>ct</b> gaaga | att <b>aaa</b> caa  | aa <b>ga</b> atata           |
| ABSA01000066_Saur_epi       | gtcgt <b>aa</b> cta | tcctc <b>ta</b> gga | aaagc <b>ga</b> ctt | cacat <b>ct</b> att | agg <b>ttat</b> gtt | ggt <b>ccc</b> atta | act <b>ct</b> gaaga | att <b>aaa</b> caa  | aa <b>ga</b> atata           |
| GU235984_Saur               | gtcgt <b>aa</b> cta | tcctc <b>ta</b> gga | aaagc <b>ga</b> ctt | cacat <b>ct</b> att | agg <b>ttat</b> gtt | ggt <b>ccc</b> atta | act <b>ct</b> gaaga | att <b>aaa</b> caa  | aa <b>ga</b> atata           |
| EU929081_Spseudin           | gtcgt <b>aa</b> cta | tcctc <b>ta</b> gga | aaagc <b>ga</b> ctt | cacat <b>ct</b> att | agg <b>ttat</b> gtt | ggt <b>ccc</b> atta | act <b>ct</b> gaaga | att <b>aaa</b> caa  | aa <b>ga</b> atata           |
| GU370073_Saur_sap_vit_kloo. | gtcgt <b>aa</b> cta | tcctc <b>ta</b> gaa | aaagc <b>ga</b> ctt | cacat <b>ct</b> att | agg <b>ttat</b> gtt | ggt <b>ccc</b> atta | act <b>ct</b> gaaga | att <b>aaa</b> caa  | aa <b>ga</b> atata           |
| AB037671_Saur               | gtcgt <b>aa</b> cta | tcctc <b>ta</b> gaa | aaagc <b>ga</b> ctt | cacat <b>ct</b> att | agg <b>ttat</b> gtt | ggt <b>ccc</b> atta | act <b>ct</b> gaaga | att <b>aaa</b> caa  | aa <b>ga</b> atata           |
| GU235983_Saur               | gtcgt <b>aa</b> cta | tcctc <b>ta</b> gaa | aaagc <b>ga</b> ctt | cacat <b>ct</b> att | agg <b>ttat</b> gtt | ggt <b>ccc</b> atta | act <b>ct</b> gaaga | att <b>aaa</b> caa  | aa <b>ga</b> atata           |
| AB221119_Saur               | gtcgt <b>aa</b> cta | tcctc <b>ta</b> gaa | aaagc <b>ga</b> ctt | cacat <b>ct</b> att | agg <b>ttat</b> gtt | ggt <b>ccc</b> atta | act <b>ct</b> gaaga | att <b>aaa</b> caa  | aa <b>ga</b> atata           |
| FN433596_TW20_Saur_ST239    | gtcgt <b>aa</b> cta | tcctc <b>ta</b> gaa | aaagc <b>ga</b> ctt | cacat <b>ct</b> att | agg <b>ttat</b> gtt | ggt <b>ccc</b> atta | act <b>ct</b> gaaga | att <b>aaa</b> caa  | aa <b>ga</b> atata           |
| BA000018_N315_Saur          | gtcgt <b>aa</b> cta | tcctc <b>ta</b> gga | aaagc <b>ga</b> ctt | cacat <b>ct</b> att | agg <b>ttat</b> gtt | ggt <b>ccc</b> atta | act <b>ct</b> gaaga | att <b>aaa</b> caa  | aa <b>ga</b> atata           |
| GQ902038_Saur_haem_pseud    | gtcgt <b>aa</b> cta | tcctc <b>ta</b> gga | aaagc <b>ga</b> ctt | cacat <b>ct</b> att | agg <b>ttat</b> gtt | ggt <b>ccc</b> atta | act <b>ct</b> gaaga | att <b>aaa</b> caa  | aa <b>ga</b> atata           |
| EU929082_Spseudin           | gtcgt <b>aa</b> cta | tcctc <b>ta</b> gga | aaagc <b>ga</b> ctt | cacat <b>ct</b> att | agg <b>ttat</b> gtt | ggt <b>ccc</b> atta | act <b>ct</b> gaaga | att <b>aaa</b> caa  | aa <b>ga</b> atata           |
| AB546266_Sfleur             | gtcgt <b>aa</b> cta | tcctc <b>ta</b> gaa | aaagc <b>ga</b> ctt | cacat <b>ct</b> att | agg <b>ttat</b> gtt | ggt <b>ccc</b> atta | act <b>ct</b> gaaga | att <b>aaa</b> caa  | aa <b>ga</b> atata           |
| AM048805_Scapi              | gtcgt <b>aa</b> cta | tcctc <b>ta</b> gaa | aaagc <b>ga</b> ctt | cacat <b>ct</b> att | agg <b>ttat</b> gtt | ggt <b>ccc</b> atta | act <b>ct</b> gaaga | att <b>aaa</b> caa  | aa <b>ga</b> atata           |
| EU929079_Spseudin           | gtcgt <b>aa</b> cta | tcctc <b>ta</b> gga | aaagc <b>ga</b> ctt | cacat <b>ct</b> att | agg <b>ttat</b> gtt | ggt <b>ccc</b> atta | act <b>ct</b> gaaga | att <b>aaa</b> caa  | aa <b>ga</b> atata           |
| GU227428_Saur               | gtcgt <b>aa</b> cta | tcctc <b>ta</b> gaa | aaagc <b>ga</b> ctt | cacat <b>ct</b> att | agg <b>ttat</b> gtt | ggt <b>ccc</b> atta | act <b>ct</b> gaaga | att <b>aaa</b> caa  | aa <b>ga</b> atata           |
| Y14051_Saur                 | gtcgt <b>aa</b> cta | tcctc <b>ta</b> gaa | aaagc <b>ga</b> ctt | cacat <b>ct</b> att | agg <b>ttat</b> gtt | ggt <b>ccc</b> atta | act <b>ct</b> gaaga | att <b>aaa</b> caa  | aa <b>ga</b> atata           |
| Y00688_Saur                 | gtcgt <b>aa</b> cta | tcctc <b>ta</b> gga | aaagc <b>ga</b> ctt | cacat <b>ct</b> att | agg <b>ttat</b> gtt | ggt <b>ccc</b> atta | act <b>ct</b> gaaga | att <b>aaa</b> caa  | aa <b>ga</b> atata           |
| EU929080_Spseudin           | gtcgt <b>aa</b> cta | tcctc <b>ta</b> gga | aaagc <b>ga</b> ctt | cacat <b>ct</b> att | agg <b>ttat</b> gtt | ggt <b>ccc</b> atta | act <b>ct</b> gaaga | att <b>aaa</b> caa  | aa <b>ga</b> atata           |
| AM048807_Sklo_Scap          | gtc <b>gca</b> cta  | tcctc <b>ta</b> gaa | aaagc <b>ga</b> cgt | cacat <b>tt</b> att | agg <b>ttat</b> gtt | gg <b>ccca</b> atta | act <b>ct</b> gaaga | att <b>aa</b> gaag  | aa <b>ga</b> at <b>tt</b> a  |
| AM048808_Sklo_cap_vit       | gtc <b>gca</b> cta  | tcctc <b>ta</b> gaa | aaagc <b>ga</b> cgt | cacat <b>tt</b> att | agg <b>ttat</b> gtt | gg <b>ccca</b> atta | act <b>ct</b> gaaga | att <b>aa</b> gaag  | aa <b>ga</b> at <b>tt</b> a  |
| AB546780_Svit               | gtc <b>gca</b> cta  | tcctc <b>ta</b> gaa | aaagc <b>ga</b> cgt | cacat <b>tt</b> att | agg <b>ttat</b> gtt | gg <b>ccca</b> atta | act <b>ct</b> gaaga | att <b>aa</b> gaag  | aa <b>ga</b> at <b>tt</b> a  |
| AY820253_Ssci               | gtc <b>gac</b> agta | tcc <b>gc</b> ttgaa | gaagc <b>aa</b> caa | cgc <b>act</b> tgct | tgg <b>ttat</b> gtt | gg <b>ccct</b> atta | act <b>c</b> agaaga | att <b>aa</b> gcaa  | aa <b>g</b> cat <b>tt</b> a  |
| Y13052_Ssci                 | gtc <b>gaca</b> ata | tcc <b>gc</b> ttgaa | gaagc <b>aa</b> caa | cgc <b>act</b> tgct | tgg <b>ttat</b> gtt | gg <b>ccct</b> atta | act <b>c</b> agaaga | att <b>aa</b> gcaa  | aa <b>g</b> cat <b>tt</b> a  |
| AB547235_Ssci               | gtc <b>gac</b> agta | tcc <b>gc</b> ttgaa | gaagc <b>aa</b> caa | cgc <b>act</b> tgct | tgg <b>ttat</b> gtt | gg <b>ccct</b> atta | act <b>c</b> agaaga | att <b>aa</b> gcaa  | aa <b>g</b> cat <b>tt</b> a  |
| S. sciuri 09-LEM-1/3        | gtc <b>gac</b> agta | tcc <b>gc</b> ttgaa | gaagc <b>aa</b> caa | cgc <b>act</b> tgct | tgg <b>ttat</b> gtt | gg <b>ccct</b> atta | act <b>c</b> agaaga | att <b>aa</b> gcaa  | aa <b>g</b> cat <b>tt</b> a  |
| Y09223_Ssci                 | gtc <b>gac</b> agta | tcc <b>gc</b> ttgaa | gaagc <b>aa</b> caa | cgc <b>act</b> tact | tgg <b>at</b> atgtt | gg <b>ccct</b> atta | att <b>c</b> agaaga | att <b>g</b> aagcaa | aa <b>g</b> cat <b>tt</b> a  |
| Y13094_Ssci                 | gtc <b>gag</b> agta | tcc <b>g</b> tttgaa | gaagc <b>aa</b> caa | cgc <b>act</b> tact | tgg <b>at</b> acgtt | gg <b>ccct</b> atta | att <b>c</b> agaaga | att <b>g</b> aagcaa | aa <b>g</b> cat <b>tt</b> a  |
| AB547236_Ssci               | gtc <b>gag</b> agta | tcc <b>g</b> tttgaa | gaagc <b>aa</b> caa | cgc <b>act</b> tact | tgg <b>at</b> acgtt | gg <b>ccct</b> atta | att <b>c</b> agaaga | att <b>g</b> aagcaa | aa <b>g</b> cat <b>tt</b> a  |
| FR821779_Saur_LGA251        | gcc <b>gt</b> ttta  | tcc <b>att</b> gaac | gaagc <b>aa</b> cag | tac <b>ac</b> ctttt | agg <b>ttat</b> gtg | ggt <b>cca</b> atta | att <b>ct</b> gacga | gt <b>t</b> aaaaagt | aa <b>g</b> caat <b>tt</b> a |
| FR823292_Saur_M10           | gcc <b>gt</b> ttta  | tcc <b>att</b> gaac | gaagc <b>aa</b> cag | tac <b>ac</b> ctttt | agg <b>ttat</b> gtg | ggt <b>cca</b> atta | att <b>ct</b> gacga | gt <b>t</b> aaaaagt | aa <b>g</b> caat <b>tt</b> a |

**Supplemental Table 3:** Alignments of known *mecA* alleles, continued

|                             | .... .... | .... .... | .... .... | .... .... | .... .... | .... .... | .... .... | .... .... | .... .... |        |       |         |      |        |      |        |      |         |
|-----------------------------|-----------|-----------|-----------|-----------|-----------|-----------|-----------|-----------|-----------|--------|-------|---------|------|--------|------|--------|------|---------|
|                             | 815       | 825       | 835       | 845       | 855       | 865       | 875       | 885       | 895       |        |       |         |      |        |      |        |      |         |
| AB546267_Sfleur             | aagg      | tataa     | agat      | gatgca    | gtt       | gttggta   | aaa       | agggact   | cgaaaa    | actt   | tacga | tataaa  | agct | ccaaca | tga  | aatggc | tat  | cgtgtca |
| Y13095_Ssci                 | aagg      | tataa     | agat      | gatgca    | gtt       | tattggta  | aaa       | agggact   | cgaaaa    | actt   | tacga | tataaa  | agct | ccaaca | tga  | aatggc | tat  | cgtgtca |
| AY786579_Saur               | aagg      | tataa     | agat      | gatgca    | gtt       | tattggta  | aaa       | agggact   | cgaaaa    | actt   | tacga | tataaa  | agct | ccaaca | tga  | aatggc | tat  | cgtgtca |
| ABSA01000066_Saur_epi       | aagg      | tataa     | agat      | gatgca    | gtt       | tattggta  | aaa       | agggact   | cgaaaa    | actt   | tacga | tataaa  | agct | ccaaca | tga  | aatggc | tat  | cgtgtca |
| GU235984_Saur               | aagg      | tataa     | agat      | gatgca    | gtt       | tattggta  | aaa       | agggact   | cgaaaa    | actt   | tacga | tataaa  | agct | ccaaca | tga  | aatggc | tat  | cgtgtca |
| EU929081_Spseudin           | aagg      | tataa     | agat      | gatgca    | gtt       | tattggta  | aaa       | agggact   | cgaaaa    | actt   | tacga | tataaa  | agct | ccaaca | tga  | aatggc | tat  | cgtgtca |
| GU370073_Saur_sap_vit_kloo. | aagg      | tataa     | agat      | gatgca    | gtt       | tattggta  | aaa       | agggact   | cgaaaa    | actt   | tacga | tataaa  | agct | ccaaca | tga  | aatggc | tat  | cgtgtca |
| AB037671_Saur               | aagg      | tataa     | agat      | gatgca    | gtt       | tattggta  | aaa       | agggact   | cgaaaa    | actt   | tacga | tataaa  | agct | ccaaca | tga  | aatggc | tat  | cgtgtca |
| GU235983_Saur               | aagg      | tataa     | agat      | gatgca    | gtt       | tattggta  | aaa       | agggact   | cgaaaa    | actt   | tacga | tataaa  | agct | ccaaca | tga  | aatggc | tat  | cgtgtca |
| AB221119_Saur               | aagg      | tataa     | agat      | gatgca    | gtt       | tattggta  | aaa       | agggact   | cgaaaa    | actt   | tacga | tataaa  | agct | ccaaca | tga  | aatggc | tat  | cgtgtca |
| FN433596_TW20_Saur_ST239    | aagg      | tataa     | agat      | gatgca    | gtt       | tattggta  | aaa       | agggact   | cgaaaa    | actt   | tacga | tataaa  | agct | ccaaca | tga  | aatggc | tat  | cgtgtca |
| BA000018_N315_Saur          | aagg      | tataa     | agat      | gatgca    | gtt       | tattggta  | aaa       | agggact   | cgaaaa    | actt   | tacga | tataaa  | agct | ccaaca | tga  | aatggc | tat  | cgtgtca |
| GQ902038_Saur_haem_pseud    | aagg      | tataa     | agat      | gatgca    | gtt       | tattggta  | aaa       | agggact   | cgaaaa    | actt   | tacga | tataaa  | agct | ccaaca | tga  | aatggc | tat  | cgtgtca |
| EU929082_Spseudin           | aagg      | tataa     | agat      | gatgca    | gtt       | tattggta  | aaa       | agggact   | cgaaaa    | actt   | tacga | tataaa  | agct | ccaaca | tga  | aatggc | tat  | cgtgtca |
| AB546266_Sfleur             | aagg      | tataa     | agat      | gatgca    | gtt       | tattggta  | aaa       | agggact   | cgaaaa    | actt   | tacga | tataaa  | agct | ccaaca | tga  | aatggc | tat  | cgtgtca |
| AM048805_Scapi              | aagg      | tataa     | agat      | gatgca    | gtt       | tattggta  | aaa       | agggact   | cgaaaa    | actt   | tacga | tataaa  | agct | ccaaca | tga  | aatggc | tat  | cgtgtca |
| EU929079_Spseudin           | aagg      | tataa     | agat      | gatgca    | gtt       | tattggta  | aaa       | agggact   | cgaaaa    | actt   | tacga | tataaa  | agct | ccaaca | tga  | aatggc | tat  | cgtgtca |
| GU227428_Saur               | aagg      | tataa     | agat      | gatgca    | gtt       | tattggta  | aaa       | agggact   | cgaaaa    | actt   | tacga | tataaa  | agct | ccaaca | tga  | aatggc | tat  | cgtgtca |
| Y14051_Saur                 | aagg      | tataa     | agat      | gatgca    | gtt       | tattggta  | aaa       | agggact   | cgaaaa    | actt   | tacga | tataaa  | agct | ccaaca | tga  | aatggc | tat  | cgtgtca |
| Y00688_Saur                 | aagg      | tataa     | agat      | gatgca    | gtt       | tattggta  | aaa       | agggact   | cgaaaa    | actt   | tacga | tataaa  | agct | ccaaca | tga  | aatggc | tat  | cgtgtca |
| EU929080_Spseudin           | aagg      | tataa     | agat      | gatgca    | gtt       | tattggta  | aaa       | agggact   | cgaaaa    | actt   | tacga | tataaa  | agct | ccaaca | tga  | aatggc | tat  | cgtgtca |
| AM048807_Sklo_Scap          | aagg      | ttatga    | agat      | gatgct    | gtc       | gttggta   | aaa       | aaggact   | cgaaaa    | actt   | tatga | tataaa  | agct | ccaaca | taa  | aatggc | tat  | cgtgtca |
| AM048808_Sklo_cap_vit       | aagg      | ttatga    | agat      | gatgct    | gtc       | gttggta   | aaa       | aaggact   | cgaaaa    | actt   | tatga | tataaa  | agct | ccaaca | taa  | aatggc | tat  | cgtgtca |
| AB546780_Svit               | aagg      | ttatga    | agat      | gatgct    | gtc       | gttggta   | aaa       | aaggact   | cgaaaa    | actt   | tatga | tataaa  | agct | ccaaca | taa  | aatggc | tat  | cgtgtca |
| AY820253_Ssci               | aagg      | ttataa    | aaa       | aatgccc   | atc       | gtcggta   | aaa       | aaggat    | cgaaaa    | actt   | tacga | tataaa  | acct | tcaaaa | taa  | aacgga | tat  | cgggtca |
| Y13052_Ssci                 | aagg      | ttataa    | aaa       | aatgccc   | atc       | gtcggaa   | aaa       | aaggat    | cgaaaa    | actt   | tacga | tataaa  | acct | tcaaaa | taa  | aacggg | tat  | cgtgtca |
| AB547235_Ssci               | aagg      | ttataa    | aaa       | aatgccc   | atc       | gtcggta   | aaa       | aaggat    | cgaaaa    | actt   | tacga | tataaa  | acct | tcaaaa | taa  | aacggg | tat  | cgtgtca |
| S. sciuri 09-LEM-1/3        | aagg      | ttataa    | aaa       | aatgccc   | atc       | gtcggta   | aaa       | aaggat    | cgaaaa    | actt   | tacga | tataaa  | acct | tcaaaa | taa  | aacgga | tacc | cggtca  |
| Y09223_Ssci                 | aagg      | ttataa    | aaa       | aatgccc   | atc       | gttggta   | aaa       | aaggat    | cgaaaa    | acta   | tacga | tataaa  | acct | tcaaaa | taa  | aacgga | tacc | cgtgtca |
| Y13094_Ssci                 | aagg      | ttataa    | aaa       | aatgccc   | atc       | gttggta   | aaa       | aaggat    | cgaaaa    | acta   | tacga | tataaa  | acct | tcaaaa | taa  | aacgga | tacc | cgtgtca |
| AB547236_Ssci               | aagg      | ttataa    | aaa       | aatgccc   | atc       | gttggta   | aaa       | aaggat    | cgaaaa    | acta   | tacga | tataaa  | acct | tcaaaa | taa  | aacgga | tacc | cgtgtca |
| FR821779_Saur_LGA251        | gaa       | actatag   | caaaa     | aatact    | gtt       | tattggaa  | aaa       | aaggctt   | aga       | acgctc | tat   | gataaac | aatt | gcaaaa | cact | gatggt | ttta | aaggat  |
| FR823292_Saur_M10           | gaa       | actatag   | caaaa     | aatact    | gtt       | tattggaa  | aaa       | aaggctt   | aga       | acgctc | tat   | gataaac | aatt | gcaaaa | cact | gatggt | ttta | aaggat  |

**Supplemental Table 3:** Alignments of known *mecA* alleles, continued

|                             | .... .... | .... .... | .... ....  | .... ....  | .... ....  | .... ....  | .... ....  | .... ....  | .... ....  |            |            |            |
|-----------------------------|-----------|-----------|------------|------------|------------|------------|------------|------------|------------|------------|------------|------------|
|                             | 905       | 915       | 925        | 935        | 945        | 955        | 965        | 975        | 985        |            |            |            |
| AB546267_Sfleur             | caatc     | ttt       | ---        | gacgat     | aatagcaata | caatcgcaca | tacattaata | gagaaaaaga | aaaagatgg  | caaagatatt | caactaacta |            |
| Y13095_Ssci                 | caatc     | ggt       | ---        | gacgat     | aatagcaata | caatcgcaca | tacattaata | gagaaaaaga | aaaagatgg  | caaagatatt | caactaacta |            |
| AY786579_Saur               | caatc     | ggt       | ---        | gacgat     | aatagcaata | caatcgcaca | tacattaata | gagaaaaaga | aaaagatgg  | caaagatatt | caactaacta |            |
| ABSA01000066_Saur_epi       | caatc     | ggt       | ---        | gacgat     | aatagcaata | caatcgcaca | tacattaata | gagaaaaaga | aaaagatgg  | caaagatatt | caactaacta |            |
| GU235984_Saur               | caatc     | ggt       | ---        | gacgat     | aatagcaata | caatcgcaca | tacattaata | gagaaaaaga | aaaagatgg  | caaagatatt | caactaacta |            |
| EU929081_Spseudin           | caatc     | ggt       | ---        | gacgat     | aatagcaata | caatcgcaca | tacattaata | gagaaaaaga | aaaagatgg  | caaagatatt | caactaacta |            |
| GU370073_Saur_sap_vit_kloo. | caatc     | ggt       | ---        | gacgat     | aatagcaata | caatcgcaca | tacattaata | gagaaaaaga | aaaagatgg  | caaagatatt | caactaacta |            |
| AB037671_Saur               | caatc     | ggt       | ---        | gacgat     | aatagcaata | caatcgcaca | tacattaata | gagaaaaaga | aaaagatgg  | caaagatatt | caactaacta |            |
| GU235983_Saur               | caatc     | ggt       | ---        | gacgat     | aatagcaata | caatcgcaca | tacattaata | gagaaaaaga | aaaagatgg  | caaagatatt | caactaacta |            |
| AB221119_Saur               | caatc     | ggt       | ---        | gacgat     | aatagcaata | caatcgcaca | tacattaata | gagaaaaaga | aaaagatgg  | caaagatatt | caactaacta |            |
| FN433596_TW20_Saur_ST239    | caatc     | ggt       | ---        | gacgat     | aatagcaata | caatcgcaca | tacattaata | gagaaaaaga | aaaagatgg  | caaagatatt | caactaacta |            |
| BA000018_N315_Saur          | caatc     | ggt       | ---        | gacgat     | aatagcaata | caatcgcaca | tacattaata | gagaaaaaga | aaaagatgg  | caaagatatt | caactaacta |            |
| GQ902038_Saur_haem_pseud    | caatc     | ggt       | ---        | gacgat     | aatagcaata | caatcgcaca | tacattaata | gagaaaaaga | aaaagatgg  | caaagatatt | caactaacta |            |
| EU929082_Spseudin           | caatc     | ggt       | ---        | gacgat     | aatagcaata | caatcgcaca | tacattaata | gagaaaaaga | aaaagatgg  | caaagatatt | caactaacta |            |
| AB546266_Sfleur             | caatc     | ggt       | ---        | gacgat     | aatagcaata | caatcgcaca | tacattaata | gagaaaaaga | aaaagatgg  | caaagatatt | caactaacta |            |
| AM048805_Scapi              | caatc     | ggt       | ---        | gacgat     | aatagcaata | caatcgcaca | tacattaata | gagaaaaaga | aaaagatgg  | caaagatatt | caactaacta |            |
| EU929079_Spseudin           | caatc     | ggt       | ---        | gacgat     | aatagcaata | caatcgcaca | tacattaata | gagaaaaaga | aaaagatgg  | caaagatatt | caactaacta |            |
| GU227428_Saur               | caatc     | ggt       | ---        | gacgat     | aatagcaata | caatcgcaca | tacattaata | gagaaaaaga | aaaagatgg  | caaagatatt | caactaacta |            |
| Y14051_Saur                 | caatc     | ggt       | ---        | gacgat     | aatagcaata | caatcgcaca | tacattaata | gagaaaaaga | aaaagatgg  | caaagatatt | caactaacta |            |
| Y00688_Saur                 | caatc     | gttag     | agtcgacgat | aatagcaata | caatcgcaca | tacattaata | gagaaaaaga | aaaagatgg  | caaagatatt | caactaacta |            |            |
| EU929080_Spseudin           | caatc     | gttag     | agtcgacgat | aatagcaata | caatcgcaca | tacattaata | gagaaaaaga | aaaagatgg  | caaagatatt | caactaacta |            |            |
| AM048807_Sklo_Scap          | ctatc     | atg       | ---        | gacgat     | aatagcaata | aagtcgcaca | tacattagta | gagaaaaaga | aaaagatgg  | caaagatatt | caactgacta |            |
| AM048808_Sklo_cap_vit       | ctatc     | atg       | ---        | gacgat     | aatagcaata | aagtcgcaca | tacattagta | gagaaaaaga | aaaagatgg  | caaagatatt | caactgacta |            |
| AB546780_Svit               | ctatc     | atg       | ---        | gacgat     | aatagcaata | aagtcgcaca | tacattagta | gagaaaaaga | aaaagatgg  | caaagatatt | caactgacta |            |
| AY820253_Ssci               | caataa    | t         | ---        | tgat       | aat        | ---aata    | aagtattga  | tacattaata | aagaaaaaga | aaaagatgg  | caaagatatt | aaattaacca |
| Y13052_Ssci                 | caatt     | att       | ---        | gatgat     | aat        | ---aata    | aagttagata | tacattgatt | aagaaaaaga | aaaagatgg  | caaagatatt | aaattaacca |
| AB547235_Ssci               | caatt     | att       | ---        | gatgat     | aat        | ---aata    | aagttagata | tacattgatt | aagaaaaaga | aaaagatgg  | caaagatatt | aaattaacca |
| S. sciuri 09-LEM-1/3        | caatt     | att       | ---        | gatgat     | aat        | ---aata    | aagttagata | tacattgatt | aagaaaaaga | aaaagatgg  | caaagatatt | aaattaacca |
| Y09223_Ssci                 | caataa    | att       | ---        | gatgat     | aat        | ---aata    | aagtattga  | tacattaata | gagaaaaaga | aaatagacgg | caaagatatt | aaattaacca |
| Y13094_Ssci                 | caatt     | att       | ---        | gatgat     | caa        | ---aata    | aagttagata | tacattaatc | gagaaaaaga | aaaagacgg  | taaagatatt | aaattaacca |
| AB547236_Ssci               | caatt     | att       | ---        | gatgat     | caa        | ---aata    | aagttagata | tacattaatc | gagaaaaaga | aaaagacgg  | taaagatatt | aaattaacca |
| FR821779_Saur_LGA251        | ccatt     | gca       | ---        | aatact     | tatgacaata | aacctttaga | cacattattg | gagaaaaagg | ctgaaaacgg | aaaagatctt | catttaacta |            |
| FR823292_Saur_M10           | ccatt     | gca       | ---        | aatact     | tatgacaata | aacctttaga | cacattattg | gagaaaaagg | ctgaaaacgg | aaaagatctt | catttaacta |            |

**Supplemental Table 3:** Alignments of known *mecA* alleles, continued

|                             | .... ....  | .... ....  | .... ....   | .... ....  | .... ....  | .... ....  | .... ....  | .... ....   | .... ....  |
|-----------------------------|------------|------------|-------------|------------|------------|------------|------------|-------------|------------|
|                             | 995        | 1005       | 1015        | 1025       | 1035       | 1045       | 1055       | 1065        | 1075       |
| AB546267_Sfleur             | ttgatgctaa | agttcaaaag | agtattttata | acaacatgaa | aaatgattat | ggctcaggta | ctgctattca | ccctcaaaca  | ggtgaattgt |
| Y13095_Ssci                 | ttgatgctaa | agttcaaaag | agtattttata | acaacatgaa | aaatgattat | ggctcaggta | ctgctatcca | ccctcaaaca  | ggtgaattat |
| AY786579_Saur               | ttgatgctaa | agttcaaaag | agtattttata | acaacatgaa | aaatgattat | ggctcaggta | ctgctatcca | ccctcaaaca  | ggtgaattat |
| ABSA01000066_Saur_epi       | ttgatgctaa | agttcaaaag | agtattttata | acaacatgaa | aaatgattat | ggctcaggta | ctgctatcca | ccctcaaaca  | ggtgaattat |
| GU235984_Saur               | ttgatgctaa | agttcaaaag | agtattttata | acaacatgaa | aaatgattat | ggctcaggta | ctgctatcca | ccctcaaaca  | ggtgaattat |
| EU929081_Spseudin           | ttgatgctaa | agttcaaaag | agtattttata | acaacatgaa | aaatgattat | ggctcaggta | ctgctatcca | ccctcaaaca  | ggtgaattat |
| GU370073_Saur_sap_vit_kloo. | ttgatgctaa | agttcaaaag | agtattttata | acaacatgaa | aaatgattat | ggctcaggta | ctgctatcca | ccctcaaaca  | ggtgaattat |
| AB037671_Saur               | ttgatgctaa | agttcaaaag | agtattttata | acaacatgaa | aaatgattat | ggctcaggta | ctgctatcca | ccctcaaaca  | ggtgaattat |
| GU235983_Saur               | ttgatgctaa | agttcaaaag | agtattttata | acaacatgaa | aaatgattat | ggctcaggta | ctgctatcca | ccctcaaaca  | ggtgaattat |
| AB221119_Saur               | ttgatgctaa | agttcaaaag | agtattttata | acaacatgaa | aaatgattat | ggctcaggta | ctgctatcca | ccctcaaaca  | ggtgaattat |
| FN433596_TW20_Saur_ST239    | ttgatgctaa | agttcaaaag | agtattttata | acaacatgaa | aaatgattat | ggctcaggta | ctgctatcca | ccctcaaaca  | ggtgaattat |
| BA000018_N315_Saur          | ttgatgctaa | agttcaaaag | agtattttata | acaacatgaa | aaatgattat | ggctcaggta | ctgctatcca | ccctcaaaca  | ggtgaattat |
| GQ902038_Saur_haem_pseud    | ttgatgctaa | agttcaaaag | agtattttata | acaacatgaa | aaatgattat | ggctcaggta | ctgctatcca | ccctcaaaca  | ggtgaattat |
| EU929082_Spseudin           | ttgatgctaa | agttcaaaag | agtattttata | acaacatgaa | aaatgattat | ggctcaggta | ctgctatcca | ccctcaaaca  | ggtgaattat |
| AB546266_Sfleur             | ttgatgctaa | agttcaaaag | agtattttata | acaacatgaa | aaatgattat | ggctcaggta | ctgctatcca | ccctcaaaca  | ggtgaattat |
| AM048805_Scapi              | ttgatgctaa | agttcaaaag | agtattttata | acaacatgaa | aaatgattat | ggctcaggta | ctgctatcca | ccctcaaaca  | ggtgaattat |
| EU929079_Spseudin           | ttgatgctaa | agttcaaaag | agtattttata | acaacatgaa | aaatgattat | ggctcaggta | ctgctatcca | ccctcaaaca  | ggtgaattat |
| GU227428_Saur               | ttgatgctaa | agttcaaaag | agtattttata | acaacatgaa | aaatgattat | ggctcaggta | ctgctatcca | ccctcaaaca  | ggtgaattat |
| Y14051_Saur                 | ttgatgctaa | agttcaaaag | agtattttata | acaacatgaa | aaatgattat | ggctcaggta | ctgctatcca | ccctcaaaca  | ggtgaattat |
| Y00688_Saur                 | ttgatgctaa | agttcaaaag | agtattttata | acaacatgaa | aaatgattat | ggctcaggta | ctgctatcca | ccctcaaaca  | ggtgaattat |
| EU929080_Spseudin           | ttgatgctaa | agttcaaaag | agtattttata | acaacatgaa | aaatgattat | ggctcaggta | ctgctatcca | ccctcaaaca  | ggtgaattat |
| AM048807_Sklo_Scap          | ttgatgctaa | cgttcaaaaa | agcattttata | acaacatgaa | aaatgattat | ggctcaggta | ctgctattca | cccacaaaaca | ggagaattgt |
| AM048808_Sklo_cap_vit       | ttgatgctaa | cgttcaaaaa | agcattttata | acaacatgaa | aaatgattat | ggctcaggta | ctgctattca | cccacaaaaca | ggagaattgt |
| AB546780_Svit               | ttgatgctaa | cgttcaaaaa | agcattttata | acaacatgaa | aaatgattat | ggctcaggta | ctgctattca | cccacaaaaca | ggagaattgt |
| AY820253_Ssci               | tcgattctag | agttcaaaaa | agtattttata | acaacatgaa | agatgactac | ggttcaggta | cagctattca | tccacaaaaca | ggcgaactgt |
| Y13052_Ssci                 | ttgatgctag | agttcaaaaa | agtattttata | acaacatgaa | agatgactac | ggttcaggga | ctgctattca | tccacaaaaca | ggcgaattgt |
| AB547235_Ssci               | ttgatgccag | agttcaaaaa | agtattttata | acaacatgaa | agatgactac | ggttcaggga | ctgctattca | tccacaaaaca | ggcgaattgt |
| S. sciuri 09-LEM-1/3        | ttgatgctag | agtccaaaaa | agtattttata | acaacatgaa | agatgactac | ggttctggga | ctgctattca | tccacaaaaca | ggcgaattgt |
| Y09223_Ssci                 | ttgatgctag | agtccaaaaa | agtattttata | acaacatgaa | agatgactac | ggttcgggga | ctgctattca | tccacaaaact | ggtgaactct |
| Y13094_Ssci                 | ttgatgctag | agtccaaaaa | agtattttata | acaacatgaa | agatgactac | ggttcgggga | ctgctattca | tccaaaaaact | ggtgaactct |
| AB547236_Ssci               | ttgatgctag | agtccaaaaa | agtattttata | acaacatgaa | agatgactac | ggttcgggga | ctgctattca | tccaaaaaact | ggtgaactct |
| FR821779_Saur_LGA251        | tagatgctag | agtacaagaa | agtattttata | aacatatgaa | aaatgacgat | ggatctggta | cagcattaca | accaaaaaact | ggagaatttt |
| FR823292_Saur_M10           | tagatgctag | agtacaagaa | agtattttata | aacatatgaa | aaatgacgat | ggatctggta | cagcattaca | accaaaaaact | ggagaatttt |

**Supplemental Table 3:** Alignments of known *mecA* alleles, continued

|                             | .... ....  | .... ....   | .... ....   | .... ....  | .... ....  | .... ....  | .... ....  | .... ....  | .... ....  |
|-----------------------------|------------|-------------|-------------|------------|------------|------------|------------|------------|------------|
|                             | 1085       | 1095        | 1105        | 1115       | 1125       | 1135       | 1145       | 1155       | 1165       |
| AB546267_Sfleur             | tagcactt   | gtaagcacac  | ctcatatgac  | gtgtaccatt | tatgtatggc | atgagtaacg | aagaatataa | taaattaacc | gaagataaaa |
| Y13095_Ssci                 | tagcactt   | gtaagcacac  | ctcatatgac  | tctatccatt | tatgtatggc | atgagtaacg | aagaatataa | taaattaacc | gaagataaaa |
| AY786579_Saur               | tagcactt   | gtaagcacac  | ctcatatgac  | tctatccatt | tatgtatggc | atgagtaacg | aagaatataa | taaattaacc | gaagataaaa |
| ABSA01000066_Saur_epi       | tagcactt   | gtaagcacac  | ctcatatgac  | tctatccatt | tatgtatggc | atgagtaacg | aagaatataa | taaattaacc | gaagataaaa |
| GU235984_Saur               | tagcactt   | gtaagcacac  | ctcatatgac  | tctatccatt | tatgtatggc | atgagtaacg | aagaatataa | taaattaacc | ggagataaaa |
| EU929081_Spseudin           | tagcactt   | gtaagcacac  | ctcatatgac  | tctatccatt | tatgtatggc | atgagtaacg | aagaatataa | taaattaacc | gaagataaaa |
| GU370073_Saur_sap_vit_kloo. | tagcactt   | gtaagcacac  | ctcatatgac  | tctatccatt | tatgtatggc | atgagtaacg | aagaatataa | taaattaacc | gaagataaaa |
| AB037671_Saur               | tagcactt   | gtaagcacac  | ctcatatgac  | tctatccatt | tatgtatggc | atgagtaacg | aagaatataa | taaattaacc | gaagataaaa |
| GU235983_Saur               | tagcactt   | gtaagcacac  | ctcatatgac  | tctatccatt | tatgtatggc | atgagtaacg | aagaatataa | taaattaacc | gaagataaaa |
| AB221119_Saur               | tagcactt   | gtaagcacac  | ctcatatgac  | tctatccatt | tatgtatggc | atgagtaacg | aagaatataa | taaattaacc | gaagataaaa |
| FN433596_TW20_Saur_ST239    | tagcactt   | gtaagcacac  | ctcatatgac  | tctatccatt | tatgtatggc | atgagtaacg | aagaatataa | taaattaacc | gaagataaaa |
| BA000018_N315_Saur          | tagcactt   | gtaagcacac  | ctcatatgac  | tctatccatt | tatgtatggc | atgagtaacg | aagaatataa | taaattaacc | gaagataaaa |
| GQ902038_Saur_haem_pseud    | tagcactt   | gtaagcacac  | ctcatatgac  | tctatccatt | tatgtatggc | atgagtaacg | aagaatataa | taaattaacc | gaagataaaa |
| EU929082_Spseudin           | tagcactt   | gtaagcacac  | ctcatatgac  | tctatccatt | tatgtatggc | atgagtaacg | aagaatataa | taaattaacc | gaagataaaa |
| AB546266_Sfleur             | tagcactt   | gtaagcacac  | ctcatatgac  | tctatccatt | tatgtatggc | atgagtaacg | aagaatataa | taaattaacc | gaagataaaa |
| AM048805_Scapi              | tagcactt   | gtaagcacac  | ctcatatgac  | tctatccatt | tatgtatggc | atgagtaacg | aagaatataa | taaattaacc | gaagataaaa |
| EU929079_Spseudin           | tagcactt   | gtaagcacac  | ctcatatgac  | tctatccatt | tatgtatggc | atgagtaacg | aagaatataa | taaattaacc | gaagataaaa |
| GU227428_Saur               | tagcactt   | gtaagcacac  | ctcatatgac  | tctatccatt | tatgtatggc | atgagtaacg | aagaatataa | taaattaacc | gaagataaaa |
| Y14051_Saur                 | tagcactt   | gtaagcacac  | ctcatatgac  | tctatccatt | tatgtatggc | atgagtaacg | aagaatataa | taaattaacc | gaagataaaa |
| Y00688_Saur                 | tagcactt   | gtaagcacac  | ctcatatgac  | tctatccatt | tatgtatggc | atgagtaacg | aagaatataa | taaattaacc | gaagataaaa |
| EU929080_Spseudin           | tagcactt   | gtaagcacac  | ctcatatgac  | tctatccatt | tatgtatggc | atgagtaacg | aagaatataa | taaattaacc | gaagataaaa |
| AM048807_Sklo_Scap          | tagcactt   | gtaagcacgc  | ctcatacgac  | tatatccatt | tatgaatggg | atgagcgacg | aagcatataa | aaaattaacc | gaagataaaa |
| AM048808_Sklo_cap_vit       | tagcactt   | gtaagcacgc  | ctcatacgac  | tatatccatt | tatgaatggg | atgagcgacg | aagcatataa | aaaattaacc | gaagataaaa |
| AB546780_Svit               | tagcactt   | gtaagcacgc  | ctcatacgac  | tatatccatt | tatgaatggg | atgagcgacg | aagcatataa | aaaattaacc | gaagataaaa |
| AY820253_Ssci               | tagcactt   | gtagcacacca | tctttatgatg | tttatccatt | tatgaatgga | atgagtgatg | aagattataa | gaaattaacc | gaagatgata |
| Y13052_Ssci                 | tagcactt   | gtagcacgcca | tctttatgatg | tttatccatt | tatgaacggg | atgagcgatg | aagattataa | gaaattaacc | gaagatgata |
| AB547235_Ssci               | tagcactt   | gtagcacgcca | tctttatgatg | tttatccatt | tatgaacggg | atgagcgatg | aagattataa | gaaattaacc | gaagatgata |
| S. sciuri 09-LEM-1/3        | tagcactt   | gtagcacacca | tctttatgatg | tttatccatt | tatgaatggg | atgagcgatg | aagattataa | gaaattaacc | gaagatgata |
| Y09223_Ssci                 | tagcactt   | gtagcacgcca | tctttatgatg | tttatccatt | tatgaatgga | atgagcgatg | aagattataa | gaaattaacc | gaagatgata |
| Y13094_Ssci                 | tagcactt   | gtagcacgcca | tctttatgatg | tttatccatt | tatgaatgga | atgagcgatg | aagattataa | gaaattaacc | gaagatgata |
| AB547236_Ssci               | tagcactt   | gtagcacgcca | tctttatgata | tttatccatt | tatgaatgga | atgagcgatg | aagattataa | gaaattaacc | gaagatgata |
| FR821779_Saur_LGA251        | tagctttggg | aagtacccca  | tcgtacgatg  | tttatccatt | catgaatgga | ttaagcaata | atgactaccg | taaattaacc | aacaataaaa |
| FR823292_Saur_M10           | tagctttggg | aagtacccca  | tcgtacgatg  | tttatccatt | catgaatgga | ttaagcaata | atgactaccg | taaattaacc | aacaataaaa |

**Supplemental Table 3:** Alignments of known *mecA* alleles, continued

|                             | .... ....  | .... ....  | .... ....  | .... ....  | .... ....   | .... ....  | .... ....  | .... ....  | .... ....  | .... .... |
|-----------------------------|------------|------------|------------|------------|-------------|------------|------------|------------|------------|-----------|
|                             | 1175       | 1185       | 1195       | 1205       | 1215        | 1225       | 1235       | 1245       | 1255       |           |
| AB546267_Sfleur             | aagaaccact | gctcaacaag | ttccagatta | caacttcacc | aggttcaact  | caaaaaatat | taacagcaat | gattgggtta | aataacaaaa |           |
| Y13095_Ssci                 | aagaacctct | gctcaacaag | ttccagatta | caacttcacc | aggttcaact  | caaaaaatat | taacagcaat | gattgggtta | aataacaaaa |           |
| AY786579_Saur               | aagaacctct | gctcaacaag | ttccagatta | caacttcacc | aggttcaact  | caaaaaatat | taacagcaat | gattgggtta | aataacaaaa |           |
| ABSA01000066_Saur_epi       | aagaacctct | gctcaacaag | ttccagatta | caacttcacc | aggttcaact  | caaaaaatat | taacagcaat | gattgggtta | aataacaaaa |           |
| GU235984_Saur               | aagaacctct | gctcaacaag | ttccagatta | caacttcacc | aggttcaact  | caaaaaatat | taacagcaat | gattgggtta | aataacaaaa |           |
| EU929081_Spseudin           | aagaacctct | gctcaacaag | ttccagatta | caacttcacc | aggttcaact  | caaaaaatat | taacagcaat | gattgggtta | aataacaaaa |           |
| GU370073_Saur_sap_vit_kloo. | aagaacctct | gctcaacaag | ttccagatta | caacttcacc | aggttcaact  | caaaaaatat | taacagcaat | gattgggtta | aataacaaaa |           |
| AB037671_Saur               | aagaacctct | gctcaacaag | ttccagatta | caacttcacc | aggttcaact  | caaaaaatat | taacagcaat | gattgggtta | aataacaaaa |           |
| GU235983_Saur               | aagaacctct | gctcaacaag | ttccagatta | caacttcacc | aggttcaact  | caaaaaatat | taacagcaat | gattgggtta | aataacaaaa |           |
| AB221119_Saur               | aagaacctct | gctcaacaag | ttccagatta | caacttcacc | aggttcaact  | caaaaaatat | taacagcaat | gattgggtta | aataacaaaa |           |
| FN433596_TW20_Saur_ST239    | aagaacctct | gctcaacaag | ttccagatta | caacttcacc | aggttcaact  | caaaaaatat | taacagcaat | gattgggtta | aataacaaaa |           |
| BA000018_N315_Saur          | aagaacctct | gctcaacaag | ttccagatta | caacttcacc | aggttcaact  | caaaaaatat | taacagcaat | gattgggtta | aataacaaaa |           |
| GQ902038_Saur_haem_pseud    | aagaacctct | gctcaacaag | ttccagatta | caacttcacc | aggttcaact  | caaaaaatat | taacagcaat | gattgggtta | aataacaaaa |           |
| EU929082_Spseudin           | aagaacctct | gctcaacaag | ttccagatta | caacttcacc | aggttcaact  | caaaaaatat | taacagcaat | gattgggtta | aataacaaaa |           |
| AB546266_Sfleur             | aagaacctct | gctcaacaag | ttccagatta | caacttcacc | aggttcaact  | caaaaaatat | taacagcaat | gattgggtta | aataacaaaa |           |
| AM048805_Scapi              | aagaacctct | gctcaacaag | ttccagatta | caacttcacc | aggttcaact  | caaaaaatat | taacagcaat | gattgggtta | aataacaaaa |           |
| EU929079_Spseudin           | aagaacctct | gctcaacaag | ttccagatta | caacttcacc | aggttcaact  | caaaaaatat | taacagcaat | gattgggtta | aataacaaaa |           |
| GU227428_Saur               | gggaacctct | gctcaacaag | ttccagatta | caatctcacc | aggttcaact  | caaaaaatat | taacagcaat | gattgggtta | aataacaaaa |           |
| Y14051_Saur                 | aagaacctct | gctcaacaag | ttccagatta | caacttcacc | aggttcaact  | caaaaaatat | taacagcaat | gattgggtta | aataacaaaa |           |
| Y00688_Saur                 | aagaacctct | gctcaacaag | ttccagatta | caacttcacc | aggttcaact  | caaaaaatat | taacagcaat | gattgggtta | aataacaaaa |           |
| EU929080_Spseudin           | aagaacctct | gctcaacaag | ttccagatta | caacttcacc | aggttcaact  | caaaaaatat | taacagcaat | gattgggtta | aataacaaaa |           |
| AM048807_Sklo_Scap          | aagaaccact | gctcaacaag | ttccagatca | caacttcacc | aggctcaact  | caaaaaatat | taacagcaat | gattggatta | aataacaaaa |           |
| AM048808_Sklo_cap_vit       | aagaaccact | gctcaacaag | ttccagatca | caacttcacc | aggctcaact  | caaaaaatat | taacagcaat | gattggatta | aataacaaaa |           |
| AB546780_Svit               | aagaaccact | gctcaacaag | ttccagatca | caacttcacc | aggctcaact  | caaaaaatat | taacagcaat | gattggatta | aataacaaaa |           |
| AY820253_Ssci               | aagaaccact | tcttaataag | ttccaaatca | cgacatcacc | tggttcgact  | caaaaaatat | taacagctat | gattggctta | aataataaga |           |
| Y13052_Ssci                 | aagagccact | tcttaataag | ttccaaatca | cgacatcacc | aggtttctact | caaaaaatat | taacagctat | tattggctta | aataataaga |           |
| AB547235_Ssci               | aagagccact | tcttaataag | ttccaaatca | cgacatcacc | aggtttctact | caaaaaatat | taacagctat | gattggctta | aataataaga |           |
| S. sciuri 09-LEM-1/3        | aagagccact | tcttaataag | ttccaaatca | cgacatcacc | cggctcgact  | caaaaaatat | taacagctat | gattcgatta | aataataaga |           |
| Y09223_Ssci                 | aagagccact | cttaataag  | ttccaaatta | cgacatcacc | aggtttcgact | caaaaaatat | taacagccat | gattggctta | aacaataaga |           |
| Y13094_Ssci                 | aagagccact | cttaataag  | ttccaaatta | cgacatcacc | gggttcgact  | caaaaaatat | taacagccat | gattggctta | aacaataaga |           |
| AB547236_Ssci               | aagagccact | cttaataag  | ttccaaatta | cgacatcacc | gggttcgact  | caaaaaatat | taacagccat | gattggctta | aacaataaga |           |
| FR821779_Saur_LGA251        | aagagccttt | gctcaacaaa | tttcaaatca | ctacatcacc | aggttcaacc  | caaaaaatat | taacatctat | tatagcctta | aaagaaaata |           |
| FR823292_Saur_M10           | aagagccttt | gctcaacaaa | tttcaaatca | ctacatcacc | aggttcaacc  | caaaaaatat | taacatctat | tatagcctta | aaagaaaata |           |

**Supplemental Table 3:** Alignments of known *mecA* alleles, continued

|                             | .... ....   | .... ....  | .... ....  | .... ....  | .... ....   | .... ....  | .... ....   | .... ....  | .... ....  | .... .... |
|-----------------------------|-------------|------------|------------|------------|-------------|------------|-------------|------------|------------|-----------|
|                             | 1265        | 1275       | 1285       | 1295       | 1305        | 1315       | 1325        | 1335       | 1345       |           |
| AB546267_Sfleur             | cattagacga  | taaaacaagt | tataaaatcg | atggtaaagg | ttggcaaaaa  | gataaatcct | ggggtggtta  | caacgttaca | agatatgaag |           |
| Y13095_Ssci                 | cattagacga  | taaaacaagt | tataaaatcg | atggtaaagg | ttggcaaaaa  | gataaatcct | ggggtggtta  | caacgttaca | agatatgaag |           |
| AY786579_Saur               | cattagacga  | taaaacaagt | tataaaatcg | atggtaaagg | ttggcaaaaa  | gataaatcct | ggggtggtta  | caacgttaca | agatatgaag |           |
| ABSA01000066_Saur_epi       | cattagacga  | taaaacaagt | tataaaatcg | atggtaaagg | ttggcaaaaa  | gataaatcct | ggggtggtta  | caacgttaca | agatatgaag |           |
| GU235984_Saur               | cattagacga  | taaaacaagt | tataaaatcg | atggtaaagg | ttggcaaaaa  | gataaatcct | ggggtggtta  | caacgttaca | agatatgaag |           |
| EU929081_Spseudin           | cattagacga  | taaaacaagt | tataaaatcg | atggtaaagg | ttggcaaaaa  | gataaatcct | ggggtggtta  | caacgttaca | agatatgaag |           |
| GU370073_Saur_sap_vit_kloo. | cattagacga  | taaaacaagt | tataaaatcg | atggtaaagg | ttggcaaaaa  | gataaatcct | ggggtggtta  | caacgttaca | agatatgaag |           |
| AB037671_Saur               | cattagacga  | taaaacaagt | tataaaatcg | atggtaaagg | ttggcaaaaa  | gataaatcct | ggggtggtta  | caacgttaca | agatatgaag |           |
| GU235983_Saur               | cattagacga  | taaaacaagt | tataaaatcg | atggtaaagg | ttggcaaaaa  | gataaatcct | ggggtggtta  | caacgttaca | agatatgaag |           |
| AB221119_Saur               | cattagacga  | taaaacaagt | tataaaatcg | atggtaaagg | ttggcaaaaa  | gataaatcct | ggggtggtta  | caacgttaca | agatatgaag |           |
| FN433596_TW20_Saur_ST239    | cattagacga  | taaaacaagt | tataaaatcg | atggtaaagg | ttggcaaaaa  | gataaatcct | ggggtggtta  | caacgttaca | agatatgaag |           |
| BA000018_N315_Saur          | cattagacga  | taaaacaagt | tataaaatcg | atggtaaagg | ttggcaaaaa  | gataaatcct | ggggtggtta  | caacgttaca | agatatgaag |           |
| GQ902038_Saur_haem_pseud    | cattagacga  | taaaacaagt | tataaaatcg | atggtaaagg | ttggcaaaaa  | gataaatcct | ggggtggtta  | caacgttaca | agatatgaag |           |
| EU929082_Spseudin           | cattagacga  | taaaacaagt | tataaaatcg | atggtaaagg | ttggcaaaaa  | gataaatcct | ggggtggtta  | caacgttaca | agatatgaag |           |
| AB546266_Sfleur             | cattagacga  | taaaacaagt | tataaaatcg | atggtaaagg | ttggcaaaaa  | gataaatcct | ggggtggtta  | caacgttaca | agatatgaag |           |
| AM048805_Scapi              | cattagacga  | taaaacaagt | tataaaatcg | atggtaaagg | ttggcaaaaa  | gataaatcct | ggggtggtta  | caacgttaca | agatatgaag |           |
| EU929079_Spseudin           | cattagacga  | taaaacaagt | tataaaatcg | atggtaaagg | ttggcaaaaa  | gataaatcct | ggggtggtta  | caacgttaca | agatatgaag |           |
| GU227428_Saur               | cattagacga  | taaaacaagt | tataaaatcg | atggtaaagg | ttggcaaaaa  | gataaatcct | ggggtggtta  | caacgttaca | agatatgaag |           |
| Y14051_Saur                 | cattagacga  | taaaacaagt | tataaaatcg | atggtaaagg | ttggcaaaaa  | gataaatcct | ggggtggtta  | caacgttaca | agatatgaag |           |
| Y00688_Saur                 | cattagacga  | taaaacaagt | tataaaatcg | atggtaaagg | ttggcaaaaa  | gataaatcct | ggggtggtta  | caacgttaca | agatatgaag |           |
| EU929080_Spseudin           | cattagacga  | taaaacaagt | tataaaatcg | atggtaaagg | ttggcaaaaa  | gataaatcct | ggggtggtta  | caacgttaca | agatatgaag |           |
| AM048807_Sklo_Scap          | cattagacga  | tcaaacaaat | tataagatta | atggtaaagg | ctggcaaaaa  | gataaatcct | ggggtgatta  | taacgttaca | agatatgaag |           |
| AM048808_Sklo_cap_vit       | cattagacga  | tcaaacaaat | tataagatta | atggtaaagg | ctggcaaaaa  | gataaatcct | ggggtgatta  | taacgttaca | agatatgaag |           |
| AB546780_Svit               | cattagacga  | tcaaacaaat | tataagatta | atggtaaagg | ctggcaaaaa  | gataaatcct | ggggtgatta  | taacgttaca | agatatgaag |           |
| AY820253_Ssci               | ctttagacga  | caaaacaagt | tataaaatta | acggaaaagg | atggcaaaaa  | gataaatcct | ggggtgacta  | caacgttaca | agatatgaag |           |
| Y13052_Ssci                 | cgtttagacga | caaaacaagt | tataaaatta | acggaaaagg | ctggcaaaaag | gataaatcct | ggggtgatta  | caacgtcaca | agatatgaag |           |
| AB547235_Ssci               | cgtttagacga | caaaacaagt | tataaaatta | acggaaaagg | ctggcaaaaa  | gataaatcct | ggggtgatta  | caacgtcaca | agatatgaag |           |
| S. sciuri 09-LEM-1/3        | cttttagacga | caaaacaagt | tataaaatta | acggaaaagg | ctggcaaaaa  | gataaatcct | ggggtgatta  | caacgtcaca | agatatgaag |           |
| Y09223_Ssci                 | cattagacgg  | caaaacaagt | tataaaatta | atggaaaagg | ttggcaaaaa  | gataaatcct | ggggtgacta  | caacgttaca | agatacgaag |           |
| Y13094_Ssci                 | cattagacgg  | caaaacaagt | tataaaatta | atggaaaagg | ttggcaaaaa  | gataaatcct | ggggtgacta  | caacgttaca | agatatgagg |           |
| AB547236_Ssci               | cattagacgg  | caaaacaagt | tataaaatta | atggaaaagg | ttggcaaaaa  | gataaatcct | ggggtggcta  | caacgttaca | agatatgagg |           |
| FR821779_Saur_LGA251        | aactagacaa  | aaataccta  | tttgatattt | atggtaaagg | ttggcaaaaa  | gatgcatcat | gggggaatta  | taatatcaca | agatttaaag |           |
| FR823292_Saur_M10           | aactagacaa  | aaataccta  | tttgatattt | atggtaaagg | ttggcaaaaa  | gatgcatcat | ggggttaatta | taatatcaca | agatttaaag |           |



**Supplemental Table 3:** Alignments of known *mecA* alleles, continued

|                             | .... ....   | .... ....  | .... ....  | .... ....  | .... ....  | .... ....  | .... ....  | .... ....  | .... ....  |
|-----------------------------|-------------|------------|------------|------------|------------|------------|------------|------------|------------|
|                             | 1355        | 1365       | 1375       | 1385       | 1395       | 1405       | 1415       | 1425       | 1435       |
| AB546267_Sfleur             | tggtaaatgg  | taatatcgac | ttaaaacaag | caatagaatc | atcagataac | atcttccttg | ctagagtagc | actcgaatta | ggcagtaaga |
| Y13095_Ssci                 | tggtaaatgg  | taatatcgac | ttaaaacaag | caatagaatc | atcagataac | atcttccttg | ctagagtagc | actcgaatta | ggcagtaaga |
| AY786579_Saur               | tggtaaatgg  | taatatcgac | ttaaaacaag | caatagaatc | atcagataac | atcttccttg | ctagagtagc | actcgaatta | ggcagtaaga |
| ABSA01000066_Saur_epi       | tggtaaatgg  | taatatcgac | ttaaaacaag | caatagaatc | atcagataac | atcttccttg | ctagagtagc | actcgaatta | ggcagtaaga |
| GU235984_Saur               | tggtaaatgg  | taatatcgac | ttaaaacaag | caatagaatc | atcagataac | atcttccttg | ctagagtagc | actcgaatta | ggcagtaaga |
| EU929081_Spseudin           | tggtaaatgg  | taatatcgac | ttaaaacaag | caatagaatc | atcagataac | atcttccttg | ctagagtagc | actcgaatta | ggcagtaaga |
| GU370073_Saur_sap_vit_kloo. | tggtaaatgg  | taatatcgac | ttaaaacaag | caatagaatc | atcagataac | atcttccttg | ctagagtagc | actcgaatta | ggcagtaaga |
| AB037671_Saur               | tggtaaatgg  | taatatcgac | ttaaaacaag | caatagaatc | atcagataac | atcttccttg | ctagagtagc | actcgaatta | ggcagtaaga |
| GU235983_Saur               | tggtaaatgg  | taatatcgac | ttaaaacaag | caatagaatc | atcagataac | atcttccttg | ctagagtagc | actcgaatta | ggcagtaaga |
| AB221119_Saur               | tggtaaatgg  | taatatcgac | ttaaaacaag | caatagaatc | atcagataac | atcttccttg | ctagagtagc | actcgaatta | ggcagtaaga |
| FN433596_TW20_Saur_ST239    | tggtaaatgg  | taatatcgac | ttaaaacaag | caatagaatc | atcagataac | atcttccttg | ctagagtagc | actcgaatta | ggcagtaaga |
| BA000018_N315_Saur          | tggtaaatgg  | taatatcgac | ttaaaacaag | caatagaatc | atcagataac | atcttccttg | ctagagtagc | actcgaatta | ggcagtaaga |
| GQ902038_Saur_haem_pseud    | tggtaaatgg  | taatatcgac | ttaaaacaag | caatagaatc | atcagataac | atcttccttg | ctagagtagc | actcgaatta | ggcagtaaga |
| EU929082_Spseudin           | tggtaaatgg  | taatatcgac | ttaaaacaag | caatagaatc | atcagataac | atcttccttg | ctagagtagc | actcgaatta | ggcagtaaga |
| AB546266_Sfleur             | tggtaaatgg  | taatatcgac | ttaaaacaag | caatagaatc | atcagataac | atcttccttg | ctagagtagc | actcgaatta | ggcagtaaga |
| AM048805_Scapi              | tggtaaatgg  | taatatcgac | ttaaaacaag | caatagaatc | atcagataac | atcttccttg | ctagagtagc | actcgaatta | ggcagtaaga |
| EU929079_Spseudin           | tggtaaatgg  | taatatcgac | ttaaaacaag | caatagaatc | atcagataac | atcttccttg | ctagagtagc | actcgaatta | ggcagtaaga |
| GU227428_Saur               | tggtaaatgg  | taatatcgac | ttaaaacaag | caatagaatc | atcagataac | atcttccttg | ctagagtagc | actcgaatta | ggcagtaaga |
| Y14051_Saur                 | tggtaaatgg  | taatatcgac | ttaaaacaag | caatagaatc | atcagataac | atcttccttg | ctagagtagc | actcgaatta | ggcagtaaga |
| Y00688_Saur                 | tggtaaatgg  | taatatcgac | ttaaaacaag | caatagaatc | atcagataac | atcttccttg | ctagagtagc | actcgaatta | ggcagtaaga |
| EU929080_Spseudin           | tggtaaatgg  | taatatcgac | ttaaaacaag | caatagaatc | atcagataac | atcttccttg | ctagagtagc | actcgaatta | ggcagtaaga |
| AM048807_Sklo_Scap          | tggtaaatgg  | taatatcgac | ttaaaacaag | caatagaatc | atcagataac | atcttccttg | ctagagtagc | actcgaatta | ggaagtaagc |
| AM048808_Sklo_cap_vit       | tggtaaatgg  | taatatcgac | ttaaaacaag | caatagaatc | atcagataac | atcttccttg | ctagagtagc | actcgaatta | ggaagtaagc |
| AB546780_Svit               | tggtaaatgg  | taatatcgac | ttaaaacaag | caatagaatc | atcagataac | atcttccttg | ctagagtagc | actcgaatta | ggaagtaagc |
| AY820253_Ssci               | ttgttaaatgg | tgatatcgat | ttaaaacaag | ctattgaatc | atcagataat | atcttccttg | cgagagttgc | acttgaatta | ggaagcaaaa |
| Y13052_Ssci                 | ttgttaaatgg | tgatatcgac | ttaaaacaag | ctattgaatc | atcggataat | atcttccttg | cgagagttgc | acttgaatta | ggaagtaaaa |
| AB547235_Ssci               | ttgttaaatgg | tgatatcgac | ttaaaacaag | ctattgaatc | atcggataat | atcttccttg | cgagagttgc | acttgaatta | ggaagtaaaa |
| S. sciuri 09-LEM-1/3        | ttgataaatgg | cgatatcgac | ttaaaacaag | ctattgaatc | atcagataat | atcttccttg | cgagagttgc | acttgaatta | ggaagtaaaa |
| Y09223_Ssci                 | ttgtgaatgc  | cgatatcgac | ttaaaacaag | ctattgaatc | atcagataat | atcttccttg | cgagagttgc | acttgaatta | ggcagcaaaa |
| Y13094_Ssci                 | tcgtgaatgg  | cgatattgac | ttaaaacaag | ctattgaatc | atcagataat | atcttccttg | cgagagttgc | acttgaatta | ggcagcaaaa |
| AB547236_Ssci               | tcgtgaatgg  | cgatattgac | ttaaaacaag | ctattgaatc | atcagataat | atcttccttg | cgagagttgc | acttgaatta | ggcagcaaaa |
| FR821779_Saur_LGA251        | tagtagacgg  | caatatcgat | ttaaagcaag | caatagaatc | atcagacaac | atattttttg | cccgcattgc | attagcatta | ggagccaaaa |
| FR823292_Saur_M10           | tagtagacgg  | caatatcgat | ttaaagcaag | caatagaatc | atcagacaac | atattttttg | cccgcattgc | attagcatta | ggagccaaaa |

**Supplemental Table 3:** Alignments of known *mecA* alleles, continued

|                             | .... ....   | .... ....   | .... ....   | .... ....  | .... ....  | .... ....  | .... ....  | .... ....  | .... ....  |
|-----------------------------|-------------|-------------|-------------|------------|------------|------------|------------|------------|------------|
|                             | 1445        | 1455        | 1465        | 1475       | 1485       | 1495       | 1505       | 1515       | 1525       |
| AB546267_Sfleur             | agtttgaaaa  | aggcatgaaa  | aaactagggtg | ttggtgaaga | tataccaagt | gattatccat | tttataatgc | tcaaatttca | aacaaaaatt |
| Y13095_Ssci                 | aatttgaaaa  | aggcatgaaa  | aaactagggtg | ttggtgaaga | tataccaagt | gattatccat | tttataatgc | tcaaatttca | aacaaaaatt |
| AY786579_Saur               | aatttgaaaa  | aggcataaaa  | aaactagggtg | ttggtgaaga | tataccaagt | gattatccat | tttataatgc | tcaaatttca | aacaaaaatt |
| ABSA01000066_Saur_epi       | aatttgaaaa  | aggcatgaaa  | aaactagggtg | ttggtgaaga | tataccaagt | gattatccat | tttataatgc | tcaaatttca | aacaaaaatt |
| GU235984_Saur               | aatttgaaaa  | aggcatgaaa  | aaactagggtg | ttggtgaaga | tataccaagt | gattatccat | tttataatgc | tcaaatttca | aacaaaaatt |
| EU929081_Spseudin           | aatttgaaaa  | aggcatgaaa  | aaactagggtg | ttggtgaaga | tataccaagt | gattatccat | tttataatgc | tcaaatttca | aacaaaaatt |
| GU370073_Saur_sap_vit_kloo. | aatttgaaaa  | aggcatgaaa  | aaactagggtg | ttggtgaaga | tataccaagt | gattatccat | tttataatgc | tcaaatttca | aacaaaaatt |
| AB037671_Saur               | aatttgaaaa  | aggcatgaaa  | aaactagggtg | ttggtgaaga | tataccaagt | gattatccat | tttataatgc | tcaaatttca | aacaaaaatt |
| GU235983_Saur               | aatttgaaaa  | aggcatgaaa  | aaactagggtg | ttggtgaaga | tataccaagt | gattatccat | tttataatgc | tcaaatttca | aacaaaaatt |
| AB221119_Saur               | aatttgaaaa  | aggcatgaaa  | aaactagggtg | ttggtgaaga | tataccaagt | gattatccat | tttataatgc | tcaaatttca | aacaaaaatt |
| FN433596_TW20_Saur_ST239    | aatttgaaaa  | aggcatgaaa  | aaactagggtg | ttggtgaaga | tataccaagt | gattatccat | tttataatgc | tcaaatttca | aacaaaaatt |
| BA000018_N315_Saur          | aatttgaaaa  | aggcatgaaa  | aaactagggtg | ttggtgaaga | tataccaagt | gattatccat | tttataatgc | tcaaatttca | aacaaaaatt |
| GQ902038_Saur_haem_pseud    | aatttgaaaa  | aggcatgaaa  | aaactagggtg | ttggtgaaga | tataccaagt | gattatccat | tttataatgc | tcaaatttca | aacaaaaatt |
| EU929082_Spseudin           | aatttgaaaa  | aggcatgaaa  | aaactagggtg | ttggtgaaga | tataccaagt | gattatccat | tttataatgc | tcaaatttca | aacaaaaatt |
| AB546266_Sfleur             | aatttgaaaa  | aggcatgaaa  | aaactagggtg | ttggtgaaga | tataccaagt | gattatccat | tttataatgc | tcaaatttca | aacaaaaatt |
| AM048805_Scapi              | aatttgaaaa  | aggcatgaaa  | aaactagggtg | ttggtgaaga | tataccaagt | gattatccat | tttataatgc | tcaaatttca | aacaaaaatt |
| EU929079_Spseudin           | aatttgaaaa  | aggcatgaaa  | aaactagggtg | ttagtgaaga | tataccaagt | gattatccat | tttataatgc | tcaaatttca | aacaaaaatt |
| GU227428_Saur               | aatttgaaaa  | aggcatgaaa  | aaactagggtg | ttggtgaaga | tataccaagt | gattatccat | tttataatgc | tcaaatttca | aacaaaaatt |
| Y14051_Saur                 | aatttgaaaa  | aggcatgaaa  | aaactagggtg | ttggtgaaga | tataccaagt | gattatccat | tttataatgc | tcaaatttca | aacaaaaatt |
| Y00688_Saur                 | aatttgaaaa  | aggcatgaaa  | aaactagggtg | ttggtgaaga | tataccaagt | gattatccat | tttataatgc | tcaaatttca | aacaaaaatt |
| EU929080_Spseudin           | aatttgaaaa  | aggcatgaaa  | aaactagggtg | ttggtgaaga | tataccaagt | gattatccat | tttataatgc | tcaaatttca | aacaaaaatt |
| AM048807_Sklo_Scap          | aatttgaaaa  | aggcatgaaa  | aaactagggtg | ttggtgaaga | cataccaagt | gattacccat | tctataatgc | acaatttca  | aacaagatt  |
| AM048808_Sklo_cap_vit       | aatttgaaaa  | aggcatgaaa  | aaactagggtg | ttggtgaaga | cataccaagt | gattacccat | tctataatgc | acaatttca  | aacaagatt  |
| AB546780_Svit               | aatttgaaaa  | aggcatgaaa  | aaactagggtg | ttggtgaaga | cataccaagt | gattacccat | tctataatgc | acaatttca  | aacaagatt  |
| AY820253_Ssci               | aattcgaaaga | aggtatgaaa  | cgcttaggcg  | ttggtgaaga | tatcccaggt | gattatccat | tctataatgc | acaatttca  | aataagaact |
| Y13052_Ssci                 | aattcgaaaga | aggtatgaaa  | cgcttaggtg  | ttggtgaaga | tatcccaggt | tattatccat | tctataatgc | acaatttca  | aataagaact |
| AB547235_Ssci               | aattcgaaaga | aggtatgaaa  | cgcttaggtg  | ttggtgaaga | tatcccaggt | gattatccat | tctataatgc | acaatttca  | aataagaact |
| S. sciuri 09-LEM-1/3        | aattcgaaaga | aggtatgaaa  | cgcctaggta  | ttggtgaaga | tattccaggt | gattatccat | tctacaatgc | acaatttca  | aataagaact |
| Y09223_Ssci                 | aattcgaaaga | aggaaatgaaa | cgcccttggtg | ttggtgaaga | tatcccaggt | gattatccat | tctacaatgc | acaatttca  | aataagaact |
| Y13094_Ssci                 | aattcgaaaga | aggaaatgaaa | cgcccttggtg | ttggtgaaga | tatcccaggt | gattatccat | tctacaatgc | acaatttca  | aataagaact |
| AB547236_Ssci               | aattcgaaaga | aggaaatgaaa | cgcccttggtg | ttggtaaaga | tatcccaggt | gattatccat | tctacaatgc | acaatttca  | aataagaact |
| FR821779_Saur_LGA251        | aatttgagca  | aggtatgcaa  | gatttgggaa  | tcggtgaaaa | tatcccaggt | gattatccct | tttataaagc | acaatctca  | aatagtaatt |
| FR823292_Saur_M10           | aatttgagca  | aggtatgcaa  | gatttgggaa  | tcggtgaaaa | tatcccaggt | gattatccct | tttataaagc | acaatctca  | aatagtaatt |

**Supplemental Table 3:** Alignments of known *mecA* alleles, continued

|                             | .... ....  | .... ....  | .... ....  | .... ....  | .... ....  | .... ....  | .... ....  | .... ....  | .... .... | .... .... |
|-----------------------------|------------|------------|------------|------------|------------|------------|------------|------------|-----------|-----------|
|                             | 1535       | 1545       | 1555       | 1565       | 1575       | 1585       | 1595       | 1605       | 1615      |           |
| AB546267_Sfleur             | tagataatga | aatattatta | gctgattcag | gttacggaca | aggTgaaata | ctgattaacc | cagtacagat | cctttcaatc | tatagcgc  | at        |
| Y13095_Ssci                 | tagataatga | aatattatta | gctgattcag | gttacggaca | aggTgaaata | ctgattaacc | cagtacagat | cctttcaatc | tatagcgc  | at        |
| AY786579_Saur               | tagataatga | aatattatta | gctgattcag | gttacggaca | aggTgaaata | ctgattaacc | cagtacagat | cctttcaatc | tatagcgc  | at        |
| ABSA01000066_Saur_epi       | tagataatga | aatattatta | gctgattcag | gttacggaca | aggTgaaata | ctgattaacc | cagtacagat | cctttcaatc | tatagcgc  | at        |
| GU235984_Saur               | tagataatga | aatattatta | gctgattcag | gttacggaca | aggTgaaata | ctgattaacc | cagtacagat | cctttcaatc | tatagcgc  | at        |
| EU929081_Spseudin           | tagataatga | aatattatta | gctgattcag | gttacggaca | aggTgaaata | ctgattaacc | cagtacagat | cctttcaatc | tatagcgc  | at        |
| GU370073_Saur_sap_vit_kloo. | tagataatga | aatattatta | gctgattcag | gttacggaca | aggTgaaata | ctgattaacc | cagtacagat | cctttcaatc | tatagcgc  | at        |
| AB037671_Saur               | tagataatga | aatattatta | gctgattcag | gttacggaca | aggTgaaata | ctgattaacc | cagtacagat | cctttcaatc | tatagcgc  | at        |
| GU235983_Saur               | tagataatga | aatattatta | gctgattcag | gttacggaca | aggTgaaata | ctgattaacc | cagtacagat | cctttcaatc | tatagcgc  | at        |
| AB221119_Saur               | tagataatga | aatattatta | gctgattcag | gttacggaca | aggTgaaata | ctgattaacc | cagtacagat | cctttcaatc | tatagcgc  | at        |
| FN433596_TW20_Saur_ST239    | tagataatga | aatattatta | gctgattcag | gttacggaca | aggTgaaata | ctgattaacc | cagtacagat | cctttcaatc | tatagcgc  | at        |
| BA000018_N315_Saur          | tagataatga | aatattatta | gctgattcag | gttacggaca | aggTgaaata | ctgattaacc | cagtacagat | cctttcaatc | tatagcgc  | at        |
| GQ902038_Saur_haem_pseud    | tagataatga | aatattatta | gctgattcag | gttacggaca | aggTgaaata | ctgattaacc | cagtacagat | cctttcaatc | tatagcgc  | at        |
| EU929082_Spseudin           | tagataatga | aatattatta | gctgattcag | gttacggaca | aggTgaaata | ctgattaacc | cagtacagat | cctttcaatc | tatagcgc  | at        |
| AB546266_Sfleur             | tagataatga | aatattatta | gctgattcag | gttacggaca | aggTgaaata | ctgattaacc | cagtacagat | cctttcaatc | tatagcgc  | at        |
| AM048805_Scapi              | tagataatga | aatattatta | gctgattcag | gttacggaca | aggTgaaata | ctgattaacc | cagtacagat | cctttcaatc | tatagcgc  | at        |
| EU929079_Spseudin           | tagataatga | aatattatta | gctgattcag | gttacggaca | aggTgaaata | ctgattaacc | cagtacagat | cctttcaatc | tatagcgc  | at        |
| GU227428_Saur               | tagataatga | aatattatta | gctgattcag | gttacggaca | aggTgaaata | atgattaacc | cagtacagat | cctttcaatc | tatagcgc  | at        |
| Y14051_Saur                 | tagataatga | aatattatta | gctgattcag | gttacggaca | aggTgaaata | ctgattaacc | cagtacagat | cctttcaatc | tatagcgc  | at        |
| Y00688_Saur                 | tagataatga | aatattatta | gctgattcag | gttacggaca | aggTgaaata | ctgattaacc | cagtacagat | cctttcaatc | tatagcgc  | at        |
| EU929080_Spseudin           | tagataatga | aatattatta | gctgattcag | gttacggaca | aggTgaaata | ctgattaacc | cagtacagat | cctttcaatc | tatagcgc  | at        |
| AM048807_Sklo_Scap          | tagataatga | aatattgtta | gcagattcag | gttacggaca | aggTgaaata | ctgattaacc | cagtacaaat | cctttcaatc | tatagcgc  | at        |
| AM048808_Sklo_cap_vit       | tagataatga | aatattgtta | gcagattcag | gttacggaca | aggTgaaata | ctgattaacc | cagtacaaat | cctttcaatc | tatagcgc  | at        |
| AB546780_Svit               | tagataatga | aatattgtta | gcagattcag | gttacggaca | aggTgaaata | ctgattaacc | cagtacaaat | cctttcaatc | tatagcgc  | at        |
| AY820253_Ssci               | tagataatga | aatattgtta | gctgactcag | gttatggaca | aggcGaaata | ttgattaatc | ctgttcaaat | tctttcaata | tatagcgc  | at        |
| Y13052_Ssci                 | tagataatga | aatattgtta | gctgactcag | gttatggcca | aggTgaaata | ttgattaatc | cagttcaaat | tctttcaata | tacagtgc  | at        |
| AB547235_Ssci               | tagataatga | aatattgtta | gctgactcag | gttatggcca | aggTgaaata | ttgattaatc | cagttcaaat | tctttcaata | tacagtgc  | at        |
| S. sciuri 09-LEM-1/3        | tagataatga | aatattgtta | gctgactcag | gttatggaca | aggTgaaata | ttgattaatc | cagttcaaat | tctttcaata | tacagtgc  | at        |
| Y09223_Ssci                 | tagataatga | aatattgtta | gctgactcag | gttatggcca | aggTgaaata | ttaatcaatc | ctgttcaaat | tctttcaata | tacagcgc  | at        |
| Y13094_Ssci                 | tagataatga | aatattgtta | gctgactcag | gttatggcca | aggTgaaata | ttaatcaatc | ctgttcaaat | tctttcaata | tacagcgc  | at        |
| AB547236_Ssci               | tagataatga | aatattgtta | gctgactcag | gttatggcca | aggTgaaata | ttaatcaatc | ctgttcaaat | tctttcaata | tacagcgc  | at        |
| FR821779_Saur_LGA251        | taaaaaatga | aatattatta | gcagattcag | gatatggcca | aggcgagata | ctagtaaacc | ctatacaaat | tttatcaata | tacagtgc  | tt        |
| FR823292_Saur_M10           | taaaaaatga | aatattatta | gcagattcag | gatatggcca | aggcgagata | ctagtaaacc | ctatacaaat | tttatcaata | tacagtgc  | tt        |

**Supplemental Table 3:** Alignments of known *mecA* alleles, continued

|                             | .... ....  | .... ....   | .... ....  | .... ....  | .... ....  | .... .... | .... ....  | .... ....  | .... ....  |
|-----------------------------|------------|-------------|------------|------------|------------|-----------|------------|------------|------------|
|                             | 1625       | 1635        | 1645       | 1655       | 1665       | 1675      | 1685       | 1695       | 1705       |
| AB546267_Sfleur             | tagaaaacaa | tggcaatatic | aatgcacctc | acttattaaa | agacacgaaa | aacaaagt  | ggaagaaaaa | tattatttcc | aaagaaaata |
| Y13095_Ssci                 | tagaaaataa | tggcaatatt  | aacgcacctc | acttattaaa | agacacgaaa | aacaaagt  | ggaagaaaaa | tattatttcc | aaagaaaata |
| AY786579_Saur               | tagaaaataa | tggcaatatt  | aacgcacctc | acttattaaa | agacacgaaa | aacaaagt  | ggaagaaaaa | tattatttcc | aaagaaaata |
| ABSA01000066_Saur_epi       | tagaaaataa | tggcaatatt  | aacgcacctc | acttattaaa | agacacgaaa | aacaaagt  | ggaagaaaaa | tattatttcc | aaagaaaata |
| GU235984_Saur               | tagaaaataa | tggcaatatt  | aacgcacctc | acttattaaa | agacacgaaa | aacaaagt  | ggaagaaaaa | tattatttcc | aaagaaaata |
| EU929081_Spseudin           | tagaaaataa | tggcaatatt  | aacgcacctc | acttattaaa | agacacgaaa | aacaaagt  | ggaagaaaaa | tattatttcc | aaagaaaata |
| GU370073_Saur_sap_vit_kloo. | tagaaaataa | tggcaatatt  | aacgcacctc | acttattaaa | agacacgaaa | aacaaagt  | ggaagaaaaa | tattatttcc | aaagaaaata |
| AB037671_Saur               | tagaaaataa | tggcaatatt  | aacgcacctc | acttattaaa | agacacgaaa | aacaaagt  | ggaagaaaaa | tattatttcc | aaagaaaata |
| GU235983_Saur               | tagaaaataa | tggcaatatt  | aacgcacctc | acttattaaa | agacacgaaa | aacaaagt  | ggaagaaaaa | tattatttcc | aaagaaaata |
| AB221119_Saur               | tagaaaataa | tggcaatatt  | aacgcacctc | acttattaaa | agacacgaaa | aacaaagt  | ggaagaaaaa | tattatttcc | aaagaaaata |
| FN433596_TW20_Saur_ST239    | tagaaaataa | tggcaatatt  | aacgcacctc | acttattaaa | agacacgaaa | aacaaagt  | ggaagaaaaa | tattatttcc | aaagaaaata |
| BA000018_N315_Saur          | tagaaaataa | tggcaatatt  | aacgcacctc | acttattaaa | agacacgaaa | aacaaagt  | ggaagaaaaa | tattatttcc | aaagaaaata |
| GQ902038_Saur_haem_pseud    | tagaaaataa | tggcaatatt  | aacgcacctc | acttattaaa | agacacgaaa | aacaaagt  | ggaagaaaaa | tattatttcc | aaagaaaata |
| EU929082_Spseudin           | tagaaaataa | tggcaatatt  | aacgcacctc | acttattaaa | agacacgaaa | aacaaagt  | ggaagaaaaa | tattatttcc | aaagaaaata |
| AB546266_Sfleur             | tagaaaataa | tggcaatatt  | aacgcacctc | acttattaaa | agacacgaaa | aacaaagt  | ggaagaaaaa | tattatttcc | aaagaaaata |
| AM048805_Scapi              | tagaaaataa | tggcaatatt  | aacgcacctc | acttattaaa | agacacgaaa | aacaaagt  | ggaagaaaaa | tattatttcc | aaagaaaata |
| EU929079_Spseudin           | tagaaaataa | tggcaatatt  | aacgcacctc | acttattaaa | agacacgaaa | aacaaagt  | ggaagaaaaa | tattatttcc | aaagaaaata |
| GU227428_Saur               | tagaaaataa | tggcaatatt  | aacgcacctc | acttattaaa | agacacgaaa | aacaaagt  | ggaagaaaaa | tattatttcc | aaagaaaata |
| Y14051_Saur                 | tagaaaataa | tggcaatatt  | aacgcacctc | acttattaaa | agacacgaaa | aacaaagt  | ggaagaaaaa | tattatttcc | aaagaaaata |
| Y00688_Saur                 | tagaaaataa | tggcaatatt  | aacgcacctc | acttattaaa | agacacgaaa | aacaaagt  | ggaagaaaaa | tattatttcc | aaagaaaata |
| EU929080_Spseudin           | tagaaaataa | tggcaatatt  | aacgcacctc | acttattaaa | agacacgaaa | aacaaagt  | ggaagaaaaa | tattatttcc | aaagaaaata |
| AM048807_Sklo_Scap          | tagaaaataa | cggcaatatt  | agcgcaccac | acgtattaaa | agacacgaaa | aacaaat   | ggaagaaaaa | tattatttcc | gaggaaaata |
| AM048808_Sklo_cap_vit       | tagaaaataa | cggcaatatt  | agcgcaccac | acgtattaaa | agacacgaaa | aacaaagt  | ggaagaaaaa | tattatttcc | gaggaaaata |
| AB546780_Svit               | tagaaaataa | cggcaatatt  | aacgcaccac | acgtattaaa | agacacgaaa | aacaaagt  | ggaagaaaaa | tattatttcc | gcggaaaata |
| AY820253_Ssci               | tagagaataa | aggtaatgta  | aatgcaccac | atgtactcaa | agatacga   | aataaagt  | ggaagaagaa | catcatttcc | caggaaaata |
| Y13052_Ssci                 | tagagaataa | aggtaatgtg  | aatgcaccac | atgtactgaa | agatacga   | aataaagt  | ggaagaagaa | tatcatttcc | caggaaaata |
| AB547235_Ssci               | tagagaataa | aggtaatgtg  | aatgcaccac | atgtactgaa | agatacga   | aataaagt  | ggaagaagaa | tatcatttcc | caggaaaata |
| S. sciuri 09-LEM-1/3        | tagagaataa | aggtaatgtg  | aatgcaccac | atgtactgaa | agatacga   | aataaagt  | ggaagaagaa | catcatttcc | caggaaaata |
| Y09223_Ssci                 | tagagaacaa | aggtaatgtg  | aatgcaccac | atgtactcaa | agatacga   | aataaagt  | ggaagaagaa | catcatttcc | caggaaaata |
| Y13094_Ssci                 | tagagaacaa | aggtaatgtg  | aatgcaccac | atgtactgaa | agatacga   | aataaagt  | ggaagaagaa | catcatttcc | caggaaaata |
| AB547236_Ssci               | tagagaacaa | aggtaatgtg  | aatgcaccac | atgtactgaa | agatacga   | aataaagt  | ggaagaagaa | catcatttcc | caggaaaata |
| FR821779_Saur_LGA251        | tagaaaataa | cggaaatata  | caaaatcctc | atgttttacg | taaaacaaa  | tctcaaat  | ggaaaaaaga | tatttacct  | aaaaagaca  |
| FR823292_Saur_M10           | tagaaaataa | cggaaatata  | caaaatcctc | atgttttacg | taaaacaaa  | tctcaaat  | ggaaaaaaga | tatttacct  | aaaaagaca  |

**Supplemental Table 3:** Alignments of known *mecA* alleles, continued

|                             | .... ....  | .... ....  | .... ....  | .... ....  | .... ....  | .... ....  | .... ....  | .... ....   | .... ....  |
|-----------------------------|------------|------------|------------|------------|------------|------------|------------|-------------|------------|
|                             | 1715       | 1725       | 1735       | 1745       | 1755       | 1765       | 1775       | 1785        | 1795       |
| AB546267_Sfleur             | tcaatctatt | aactgatggt | atgcaacaag | tcgtaaataa | aacacataaa | gaagatattt | atagacctta | cgcaaacctta | attggcaaat |
| Y13095_Ssci                 | tcaatctatt | aactgatggt | atgcaacaag | tcgttaataa | aacacataaa | gaagatattt | atagatctta | tgccaactta  | attggcaaat |
| AY786579_Saur               | tcaatctatt | aactgatggt | atgcaacaag | tcgtaaataa | aacacataaa | gaagatattt | atagatctta | tgcaaacctta | attggcaaat |
| ABSA01000066_Saur_epi       | tcaatctatt | aactgatggt | atgcaacaag | tcgtaaataa | aacacataaa | gaagatattt | atagatctta | tgcaaacctta | attggcaaat |
| GU235984_Saur               | tcaatctatt | aactgatggt | atgcaacaag | tcgtaaataa | aacacataaa | gaagatattt | atagatctta | tgcaaacctta | attggcaaat |
| EU929081_Spseudin           | tcaatctatt | aactgatggt | atgcaacaag | tcgtaaataa | aacacataaa | gaagatattt | atagatctta | tgcaaacctta | attggcaaat |
| GU370073_Saur_sap_vit_kloo. | tcaatctatt | aactgatggt | atgcaacaag | tcgtaaataa | aacacataaa | gaagatattt | atagatctta | tgcaaacctta | attggcaaat |
| AB037671_Saur               | tcaatctatt | aactgatggt | atgcaacaag | tcgtaaataa | aacacataaa | gaagatattt | atagatctta | tgcaaacctta | attggcaaat |
| GU235983_Saur               | tcaatctatt | aactgatggt | atgcaacaag | tcgtaaataa | aacacataaa | gaagatattt | atagatctta | tgcaaacctta | attggcaaat |
| AB221119_Saur               | tcaatctatt | aactgatggt | atgcaacaag | tcgtaaataa | aacacataaa | gaagatattt | atagatctta | tgcaaacctta | attggcaaat |
| FN433596_TW20_Saur_ST239    | tcaatctatt | aactgatggt | atgcaacaag | tcgtaaataa | aacacataaa | gaagatattt | atagatctta | tgcaaacctta | attggcaaat |
| BA000018_N315_Saur          | tcaatctatt | aactgatggt | atgcaacaag | tcgtaaataa | aacacataaa | gaagatattt | atagatctta | tgcaaacctta | attggcaaat |
| GQ902038_Saur_haem_pseud    | tcaatctatt | aactgatggt | atgcaacaag | tcgtaaataa | aacacataaa | gaagatattt | atagatctta | tgcaaacctta | attggcaaat |
| EU929082_Spseudin           | tcaatctatt | aactgatggt | atgcaacaag | tcgtaaataa | aacacataaa | gaagatattt | atagatctta | tgcaaacctta | attggcaaat |
| AB546266_Sfleur             | tcaatctatt | aactgatggt | atgcaacaag | tcgtaaataa | aacacataaa | gaagatattt | atagatctta | tgcaaacctta | attggcaaat |
| AM048805_Scapi              | tcaatctatt | aactgatggt | atgcaacaag | tcgtaaataa | aacacataaa | gaagatattt | atagatctta | tgcaaacctta | attggcaaat |
| EU929079_Spseudin           | tcaatctatt | aactgatggt | atgcaacaag | tcgtaaataa | aacacataaa | gaagatattt | atagatctta | tgcaaacctta | attggcaaat |
| GU227428_Saur               | tcaatctatt | aaatgatggt | atgcaacaag | tcgtaaataa | aacacataaa | gaagatattt | atagatctta | tgcaaacctta | attggcaaat |
| Y14051_Saur                 | tcaatctatt | aaatgatggt | atgcaacaag | tcgtaaataa | aacacataaa | gaagatattt | atagatctta | tgcaaacctta | attggcaaat |
| Y00688_Saur                 | tcaatctatt | aaatgatggt | atgcaacaag | tcgtaaataa | aacacataaa | gaagatattt | atagatctta | tgcaaacctta | attggcaaat |
| EU929080_Spseudin           | tcaatctatt | aactgatggt | atgcaacaag | tcgtaaataa | aacacataaa | gaagatattt | atagatctta | tgcaaacctta | attggcaaat |
| AM048807_Sklo_Scap          | tcaatctatt | aacagacggc | atgcaacaag | tcgtaaacaa | aacacataga | gaagatattt | atagaccata | cgcaaacctta | gttggtaaat |
| AM048808_Sklo_cap_vit       | tcaatctatt | aacagacggc | atgcaacaag | tcgtaaacaa | aacacataga | gaagatattt | atagaccata | cgcaaacctta | gttggtaaat |
| AB546780_Svit               | tcaatctatt | aacagacggc | atgcaacaag | tcgtaaacaa | aacacataga | gaagatattt | atagaccata | cgcaaacctta | gttggtaaat |
| AY820253_Ssci               | ttaaattggt | aacagacggc | atgcaacaag | tcgtgaacaa | aacacataga | gaagatattt | atagatcata | tgccaactta  | gttggtaaat |
| Y13052_Ssci                 | ttaaattggt | aacagacggt | atgcaacaag | tcgtcaacaa | aacacataga | gaagatattt | atagatcata | tgccaactta  | gttggtaaat |
| AB547235_Ssci               | ttaaattggt | aacagacggt | atgcaacaag | tcgtcaacaa | aacacataga | gaagatattt | atagatcata | tgccaactta  | gttggtaaat |
| S. sciuri 09-LEM-1/3        | ttaaattggt | aacagacggt | atgcaacaag | tcgtcaacaa | aacacataga | gaagatattt | atagatcata | tgccaactta  | gttggtaaat |
| Y09223_Ssci                 | ttaaattggt | aacagacggt | atgcaacaag | tcgtgaacaa | aacacataga | gaagatattt | atagatcata | tgccaactta  | gttggtaaat |
| Y13094_Ssci                 | ttaagttggt | aacagacggt | atgcaacaag | tcgttaacaa | aacacataga | gaagatattt | atagatcata | tgccaactta  | gttggtaaat |
| AB547236_Ssci               | ttaagttggt | aacagacggt | atgcaacaag | tcgttaacaa | aacacataga | gaagatattt | atagatcata | tgccaactta  | gttggtaaat |
| FR821779_Saur_LGA251        | tagatatatt | aactaatggt | atggaacgtg | tagttaataa | aacacatagg | gatgatata  | acaaaaatta | tgcccgaatt  | attggtaaat |
| FR823292_Saur_M10           | tagatatatt | aactaatggt | atggaacgtg | tagttaataa | aacacatagg | gatgatata  | acaaaaatta | tgcccgaatt  | attggtaaat |

**Supplemental Table 3:** Alignments of known *mecA* alleles, continued

|                             | .... ....  | .... ....  | .... ....  | .... ....  | .... ....  | .... ....  | .... ....   | .... ....   | .... ....  |
|-----------------------------|------------|------------|------------|------------|------------|------------|-------------|-------------|------------|
|                             | 1805       | 1815       | 1825       | 1835       | 1845       | 1855       | 1865        | 1875        | 1885       |
| AB546267_Sfleur             | ccggtactgc | agaactcaaa | atgaaacaag | gagaaactgg | gagacaaatt | gggtggttta | tatcatatga  | taaagataat  | ccaaacatga |
| Y13095_Ssci                 | ccggtactgc | cgaactcaaa | atgaaacaag | gagaaactgg | ccgaccaatt | gggtggttta | tatcatatga  | taaagataat  | ccccacctga |
| AY786579_Saur               | ccggtactgc | agaactcaaa | atgaaacaag | gagaaactgg | cagacaaatt | gggtggttta | tatcatatga  | taaagataat  | ccaaacatga |
| ABSA01000066_Saur_epi       | ccggtactgc | agaactcaaa | atgaaacaag | gagaaactgg | cagacaaatt | gggtggttta | tatcatatga  | taaagataat  | ccaaacatga |
| GU235984_Saur               | ccggtactgc | agaactcaaa | atgaaacaag | gagaaactgg | cagacaaatt | gggtggttta | tatcatatga  | taaagataat  | ccaaacatga |
| EU929081_Spseudin           | ccggtactgc | agaactcaaa | atgaaacaag | gagaaactgg | cagacaaatt | gggtggttta | tatcatatga  | taaagataat  | ccaaacatga |
| GU370073_Saur_sap_vit_kloo. | ccggtactgc | agaactcaaa | atgaaacaag | gagaaactgg | cagacaaatt | gggtggttta | tatcatatga  | taaagataat  | ccaaacatga |
| AB037671_Saur               | ccggtactgc | agaactcaaa | atgaaacaag | gagaaactgg | cagacaaatt | gggtggttta | tatcatatga  | taaagataat  | ccaaacatga |
| GU235983_Saur               | ccggtactgc | agaactcaaa | atgaaacaag | gagaaactgg | cagacaaatt | gggtggttta | tatcatatga  | taaagataat  | ccaaacatga |
| AB221119_Saur               | ccggtactgc | agaactcaaa | atgaaacaag | gagaaactgg | cagacaaatt | gggtggttta | tatcatatga  | taaagataat  | ccaaacatga |
| FN433596_TW20_Saur_ST239    | ccggtactgc | agaactcaaa | atgaaacaag | gagaaactgg | cagacaaatt | gggtggttta | tatcatatga  | taaagataat  | ccaaacatga |
| BA000018_N315_Saur          | ccggtactgc | agaactcaaa | atgaaacaag | gagaaactgg | cagacaaatt | gggtggttta | tatcatatga  | taaagataat  | ccaaacatga |
| GQ902038_Saur_haem_pseud    | ccggtactgc | agaactcaaa | atgaaacaag | gagaaactgg | cagacaaatt | gggtggttta | tatcatatga  | taaagataat  | ccaaacatga |
| EU929082_Spseudin           | ccggtactgc | agaactcaaa | atgaaacaag | gagaaacagg | cagacaaatt | gggtggttta | tatcatatga  | taaagataat  | ccaaacatga |
| AB546266_Sfleur             | ccggtactgc | agaactcaaa | atgaaacaag | gagaaactgg | cagacaaatt | gggtggttta | tatcatatga  | taaagataat  | ccaaacatga |
| AM048805_Scapi              | ccggtactgc | agaactcaaa | atgaaacaag | gagaaactgg | cagacaaatt | gggtggttta | tatcatatga  | taaagataat  | ccaaacatga |
| EU929079_Spseudin           | ccggtactgc | agaactcaaa | atgaaacaag | gagaaactgg | cagacaaatt | gggtggttta | tatcatatga  | taaagataat  | ccaaacatga |
| GU227428_Saur               | ccggtactgc | agaactcaaa | atgaaacaag | gagaaagtgg | cagacaaatt | gggtggttta | tatcatatga  | taaagataat  | ccaaacatga |
| Y14051_Saur                 | ccggtactgc | agaactcaaa | atgaaacaag | gagaaagtgg | cagacaaatt | gggtggttta | tatcatatga  | taaagataat  | ccaaacatga |
| Y00688_Saur                 | ccggtactgc | agaactcaaa | atgaaacaag | gagaaactgg | cagacaaatt | gggtggttta | tatcatatga  | taaagataat  | ccaaacatga |
| EU929080_Spseudin           | ccggtactgc | agaactcaaa | atgaaacaag | gagaaactgg | cagacaaatt | gggtggttta | tatcatatga  | taaagataat  | ccaaacatga |
| AM048807_Sklo_Scap          | ccggaacagc | agaactcaaa | atgaaacaag | gcgaaacagg | cagacagatt | ggttggttta | tatccttatga | taaagacaat  | ccaaatatga |
| AM048808_Sklo_cap_vit       | ccggaacagc | agaactcaaa | atgaaacaag | gcgaaacagg | cagacagatt | ggttggttta | tatccttatga | taaagacaat  | ccaaatatga |
| AB546780_Svit               | ccggaacagc | agaactcaaa | atgaaacaag | gcgaaacagg | cagacagatt | ggttggttta | tatccttatga | taaagacaat  | ccaaatatga |
| AY820253_Ssci               | caggcacagc | tgaactcaag | atgaaacaag | gtgagacagg | acaacaaata | ggttggttca | tttcttataa  | taaagataat  | ccaaatatga |
| Y13052_Ssci                 | caggtacagc | tgaactcaag | atgaaacaag | gtgagacagg | acaacaaata | ggctggttca | tttcatatga  | taaagataat  | ccaaatatga |
| AB547235_Ssci               | caggtacagc | tgaactcaag | atgaaacaag | gtgagacagg | acaacaaata | ggctggttca | tttcatatga  | taaagataat  | ccaaatatga |
| S. sciuri 09-LEM-1/3        | caggaacagc | tgaactcaag | atgaaacaag | gtgagacagg | acaacaaata | ggctggttca | tttcatatra  | taaagataat  | ccaaatatga |
| Y09223_Ssci                 | caggtacagc | tgaactcaag | atgaaacaag | gtgagacagg | acaacaaata | ggttggttca | tttcatatga  | taaagataat  | ccaaatataa |
| Y13094_Ssci                 | caggtacagc | tgaactcaag | atgaaacaag | gtgagacagg | acaacaaata | ggttggttca | tttcatatga  | taaaaaataat | ccaaatatga |
| AB547236_Ssci               | caggtacagc | tgaactcaag | atgaaacaag | gtgagacagg | acaacaaata | ggttggttca | tttcatatga  | taaaaaataat | ccaaatatga |
| FR821779_Saur_LGA251        | ctggcacagc | agaattaaaa | atgaatcaag | gggaaactgg | aagacaaata | ggttggtttg | tttcatataa  | taaaaaataat | cctaatatgt |
| FR823292_Saur_M10           | ctggcacagc | agaattaaaa | atgaatcaag | gggaaactgg | aagacaaata | ggttggtttg | tttcatataa  | taaaaaataat | cctaatatgt |

**Supplemental Table 3:** Alignments of known *mecA* alleles, continued

|                             | .... ....  | .... ....  | .... ....  | .... ....  | .... ....  | .... ....  | .... ....  | .... ....  | .... ....  |
|-----------------------------|------------|------------|------------|------------|------------|------------|------------|------------|------------|
|                             | 1895       | 1905       | 1915       | 1925       | 1935       | 1945       | 1955       | 1965       | 1975       |
| AB546267_Sfleur             | tgatggctat | taatgttaaa | gatgtacaag | ataaaggaat | ggctagctac | aatgccaaaa | tctcaggtaa | agtgtatgat | gagctatatg |
| Y13095_Ssci                 | tgatggctat | taatgttaaa | gatgttccag | ataaaggaat | ggctagctac | aatgccaaaa | tctcaggtaa | agtgtatgat | gagctatatg |
| AY786579_Saur               | tgatggctat | taatgttaaa | gatgtacaag | ataaaggaat | ggctagctac | aatgccaaaa | tctcaggtaa | agtgtatgat | gagctatatg |
| ABSA01000066_Saur_epi       | tgatggctat | taatgttaaa | gatgtacaag | ataaaggaat | ggctagctac | aatgccaaaa | tctcaggtaa | agtgtatgat | gagctatatg |
| GU235984_Saur               | tgatggctat | taatgttaaa | gatgtacaag | ataaaggaat | ggctagctac | aatgccaaaa | tctcaggtaa | agtgtatgat | gagctatatg |
| EU929081_Spseudin           | tgatggctat | taatgttaaa | gatgtacaag | ataaaggaat | ggctagctac | aatgccaaaa | tctcaggtaa | agtgtatgat | gagctatatg |
| GU370073_Saur_sap_vit_kloo. | tgatggctat | taatgttaaa | gatgtacaag | ataaaggaat | ggctagctac | aatgccaaaa | tctcaggtaa | agtgtatgat | gagctatatg |
| AB037671_Saur               | tgatggctat | taatgttaaa | gatgtacaag | ataaaggaat | ggctagctac | aatgccaaaa | tctcaggtaa | agtgtatgat | gagctatatg |
| GU235983_Saur               | tgatggctat | taatgttaaa | gatgtacaag | ataaaggaat | ggctagctac | aatgccaaaa | tctcaggtaa | agtgtatgat | gagctatatg |
| AB221119_Saur               | tgatggctat | taatgttaaa | gatgtacaag | ataaaggaat | ggctagctac | aatgccaaaa | tctcaggtaa | agtgtatgat | gagctatatg |
| FN433596_TW20_Saur_ST239    | tgatggctat | taatgttaaa | gatgtacaag | ataaaggaat | ggctagctac | aatgccaaaa | tctcaggtaa | agtgtatgat | gagctatatg |
| BA000018_N315_Saur          | tgatggctat | taatgttaaa | gatgtacaag | ataaaggaat | ggctagctac | aatgccaaaa | tctcaggtaa | agtgtatgat | gagctatatg |
| GQ902038_Saur_haem_pseud    | tgatggctat | taatgttaaa | gatgtacaag | ataaaggaat | ggctagctac | aatgccaaaa | tctcaggtaa | agtgtatgat | gagctatatg |
| EU929082_Spseudin           | tgatggctat | taatgttaaa | gatgtacaag | ataaaggaat | ggctagctac | aatgccaaaa | tctcaggtaa | agtgtatgat | gagctatatg |
| AB546266_Sfleur             | tgatggctat | taatgttaaa | gatgtacaag | ataaaggaat | ggctagctac | aatgccaaaa | tctcaggtaa | agtgtatgat | gagctatatg |
| AM048805_Scapi              | tgatggctat | taatgttaaa | gatgtacaag | ataaaggaat | ggctagctac | aatgccaaaa | tctcaggtaa | agtgtatgat | gagctatatg |
| EU929079_Spseudin           | tgatggctat | taatgttaaa | gatgtacaag | ataaaggaat | ggctagctac | aatgccaaaa | tctcaggtaa | agtgtatgat | gagctatatg |
| GU227428_Saur               | tgatggctat | taatgttaaa | gatgtacaag | ataaaggaat | ggctagctac | aatgccaaaa | tctcaggtaa | agtgtatgat | gagctatatg |
| Y14051_Saur                 | tgatggctat | taatgttaaa | gatgtacaag | ataaaggaat | ggctagctac | aatgccaaaa | tctcaggtaa | agtgtatgat | gagctatatg |
| Y00688_Saur                 | tgatggctat | taatgttaaa | gatgtacaag | ataaaggaat | ggctagctac | aatgccaaaa | tctcaggtaa | agtgtatgat | gagctatatg |
| EU929080_Spseudin           | tgatggctat | taatgttaaa | gatgtacaag | ataaaggaat | ggctagctac | aatgccaaaa | tctcaggtaa | agtgtatgat | gagctatatg |
| AM048807_Sklo_Scap          | tgatggccat | taatgttaaa | gatgtacaag | ataaaggcat | ggcgagttac | aacgccaaaa | tctcaggtaa | agtttatgat | gacctatacg |
| AM048808_Sklo_cap_vit       | tgatggccat | taatgttaaa | gatgtacaag | ataaaggcat | ggcgagttac | aacgccaaaa | tctcaggtaa | agtttatgat | gacctatacg |
| AB546780_Svit               | tgatggccat | taatgttaaa | gatgtacaag | ataaaggcat | ggcgagttac | aacgccaaaa | tctcaggtaa | agtttatgat | gacctatacg |
| AY820253_Ssci               | tgatggctat | taatgtgaaa | gatgtacaag | ataaaggtat | ggcaagttac | aatgccaaaa | tatctggaaa | agtgtatgac | gatttatatg |
| Y13052_Ssci                 | tgatggctat | taatgtgaaa | gatgttcaag | ataaaggtat | ggcaagttac | aatgccgaaa | tatcaggaaa | agtgtatgac | gatttatatg |
| AB547235_Ssci               | tgatggctat | taatgtgaaa | gatgttcaag | ataaaggtat | ggcaagttac | aatgccaaaa | tatcaggaaa | agtgtatgac | gatttatatg |
| S. sciuri 09-LEM-1/3        | tgatggctat | taatgtgaaa | gatgtacaag | ataaaggtat | ggcaagttac | aatgccaaaa | tatctggaaa | agtgtatgac | gatttatatg |
| Y09223_Ssci                 | tgatggctat | taatgtgaaa | gatgtacaag | ataaaggcat | ggcaagttac | aatgccaaaa | tatctggaaa | agtgtatgac | gatttatatg |
| Y13094_Ssci                 | tgatggctat | taatgtgaaa | gatgtacaag | ataaaggcat | ggcaagttac | aatgccaaaa | tatctggaaa | agtgtatgac | gatttatatg |
| AB547236_Ssci               | tgatggctat | taatgtgaaa | gatgtacaag | ataaaggcat | ggcaagttac | aatgccaaaa | tatctggaaa | agtgtatgac | gatttatatg |
| FR821779_Saur_LGA251        | taatggcgat | taatgttaaa | gacgttcaaa | ataaagggat | ggccagctat | aatgctacta | tatctggaaa | agtttatgat | gatttggatg |
| FR823292_Saur_M10           | taatggcgat | taatgttaaa | gacgttcaaa | ataaagggat | ggccagctat | aatgctacta | tatctggaaa | agtttatgat | gatttggatg |

**Supplemental Table 3:** Alignments of known *mecA* alleles, continued

|                             | .... ....   | .... ....  | .... ....  | ....  |
|-----------------------------|-------------|------------|------------|-------|
|                             | 1985        | 1995       | 2005       | 2015  |
| AB546267_Sfleur             | agaacggtaa  | taaaaaatac | gatatagata | aataa |
| Y13095_Ssci                 | agaacggtaa  | taaaaaatac | gatatagatg | aataa |
| AY786579_Saur               | agaacggtaa  | taaaaaatac | gatatagatg | aataa |
| ABSA01000066_Saur_epi       | agaacggtaa  | taaaaaatac | gatatagatg | aataa |
| GU235984_Saur               | agaacggtaa  | taaaaaatac | gatatagatg | aataa |
| EU929081_Spseudin           | agaacggtaa  | taaaaaatac | gatatagatg | aataa |
| GU370073_Saur_sap_vit_kloo. | agaacggtaa  | taaaaaatac | gatatagatg | aataa |
| AB037671_Saur               | agaacggtaa  | taaaaaatac | gatatagatg | aataa |
| GU235983_Saur               | agaacggtaa  | taaaaaatac | gatatagatg | aataa |
| AB221119_Saur               | agaacggtaa  | taaaaaatac | gatatagatg | aataa |
| FN433596_TW20_Saur_ST239    | agaacggtaa  | taaaaaatac | gatatagatg | aataa |
| BA000018_N315_Saur          | agaacggtaa  | taaaaaatac | gatatagatg | aataa |
| GQ902038_Saur_haem_pseud    | agaacggtaa  | taaaaaatac | gatatagatg | aataa |
| EU929082_Spseudin           | agaacggtaa  | taaaaaatac | gatatagatg | aataa |
| AB546266_Sfleur             | agaacggtaa  | taaaaaatac | gatatagatg | aataa |
| AM048805_Scapi              | agaacggtaa  | taaaaaatac | gatatagatg | aataa |
| EU929079_Spseudin           | agaacggtaa  | taaaaaatac | gatatagatg | aataa |
| GU227428_Saur               | agaacggtaa  | taaaaaatac | gatatagatg | aataa |
| Y14051_Saur                 | agaacggtaa  | taaaaaatac | gatatagatg | aataa |
| Y00688_Saur                 | agaacggtaa  | taaaaaatac | gatatagatg | aataa |
| EU929080_Spseudin           | agaacggtaa  | taaaaaatac | gatatagatg | aataa |
| AM048807_Sklo_Scap          | agaacggtaa  | taaaaaatac | gatatagatg | aataa |
| AM048808_Sklo_cap_vit       | agaacggtaa  | taaaaaatac | gatatagatg | aataa |
| AB546780_Svit               | agaacggtaga | taaaaaattc | gatatagata | aataa |
| AY820253_Ssci               | ataacggtaa  | gaaaacatat | aatattgata | aataa |
| Y13052_Ssci                 | ataacggcaa  | gaaaacgtat | cgtattgata | aataa |
| AB547235_Ssci               | ataacggcaa  | gaaaacgtat | cgtattgata | aataa |
| S. sciuri 09-LEM-1/3        | ataacggtaa  | gaaaacgtat | aatattgata | aataa |
| Y09223_Ssci                 | ataacggtaa  | gaaaacgtat | cgtattgata | aataa |
| Y13094_Ssci                 | ataacggtaa  | gaaaacatat | cgtattgata | aataa |
| AB547236_Ssci               | ataacggtaa  | gaaaacgtat | cgtattgata | aataa |
| FR821779_Saur_LGA251        | ataatggaaa  | aactcaattt | gatatagatc | agtaa |
| FR823292_Saur_M10           | ataatggaaa  | aactcaattt | gatatagatc | agtaa |



**Supplemental Table 4:** *mecA* sequences, alleles and predicted array hybridization patterns

| Universal Sequence Allocator     | Species, isolate                              | Allele number<br>(as in Figure 1) | Allele designation   | Variant (based on<br>predicted amino<br>acid sequence) | Array pattern           |          |                      |          |
|----------------------------------|-----------------------------------------------|-----------------------------------|----------------------|--------------------------------------------------------|-------------------------|----------|----------------------|----------|
| AB037671.1 [24421:26427]         | <i>S. aureus</i> , 85-2082                    | <b>1</b>                          | <i>mecA_AB037671</i> | AB037671                                               | [AB546266] / [CP000046] |          |                      |          |
| AEEK01000041.1 [2440:4446:r]     | <i>S. aureus</i> , BAA-39                     |                                   |                      |                                                        |                         |          |                      |          |
| AB221119.1 [91:2097]             | <i>S. aureus</i>                              | <b>2</b>                          | <i>mecA_AB221119</i> | AB221119                                               |                         |          |                      |          |
| FN433596.1 [76827:78833:r]       | <i>S. aureus</i> , TW20-ST239                 | <b>19</b>                         | <i>mecA_FN433596</i> | FN433596                                               |                         |          |                      |          |
| GU235983.1 [4794:6800:r]         | <i>S. aureus</i>                              |                                   |                      |                                                        |                         |          |                      |          |
| AB033763.2 [31390:33396]         | <i>S. aureus</i> , NCTC10442                  | <b>22</b>                         | <i>mecA_GU235983</i> | GU235983                                               |                         |          |                      |          |
| AB047089.2 [2517:4523:r]         | <i>S. aureus</i> , 85-3907                    |                                   |                      |                                                        |                         |          |                      |          |
| AB096217.1 [20340:22346]         | <i>S. aureus</i> , MR108                      | <b>24</b>                         | <i>mecA_GU370073</i> | GU370073                                               |                         |          |                      |          |
| AB221120.1 [91:2097]             | <i>S. aureus</i>                              |                                   |                      |                                                        |                         |          |                      |          |
| AB221123.1 [91:2097]             | <i>S. aureus</i>                              |                                   |                      |                                                        |                         |          |                      |          |
| AB236888.1 [91:2097]             | <i>S. aureus</i>                              |                                   |                      |                                                        |                         |          |                      |          |
| AB245471.1 [13822:15828]         | <i>S. aureus</i> , 80s-2                      |                                   |                      |                                                        |                         |          |                      |          |
| AB266532.1 [33:2039:r]           | <i>S. aureus</i>                              |                                   |                      |                                                        |                         |          |                      |          |
| AB266533.1 [30:2036:r]           | <i>S. aureus</i>                              |                                   |                      |                                                        |                         |          |                      |          |
| AB353724.1 [5461:7467:r]         | <i>S. saprophyticus</i>                       |                                   |                      |                                                        |                         |          |                      |          |
| AB373032.1 [20471:22477:r]       | <i>S. aureus</i>                              |                                   |                      |                                                        |                         |          |                      |          |
| AB425824.1 [6036:8042:r]         | <i>S. aureus</i>                              |                                   |                      |                                                        |                         |          |                      |          |
| ACSN01000041.1 [2589:4595:r]     | <i>S. aureus</i> , A9765                      |                                   |                      |                                                        |                         |          |                      |          |
| ACYP01000048.1 [214779:216785:r] | <i>S. aureus</i> , A017934/97                 |                                   |                      |                                                        |                         |          |                      |          |
| ACZQ01000131.1 [1478:3484]       | <i>S. aureus</i> , MR1                        |                                   |                      |                                                        |                         |          |                      |          |
| AF411935.3 [15571:17577]         | <i>S. aureus</i>                              |                                   |                      |                                                        |                         |          |                      |          |
| AM048802.2 [1:2007]              | <i>S. vitulinus</i>                           |                                   |                      |                                                        |                         |          |                      |          |
| AM048803.2 [1:2007]              | <i>S. kloosii</i>                             |                                   |                      |                                                        |                         |          |                      |          |
| AM904731.1 [23787:25793]         | <i>S. pseudintermedius</i>                    |                                   |                      |                                                        |                         |          |                      |          |
| AY271717.1 [16531:18537]         | <i>S. aureus</i>                              |                                   |                      |                                                        |                         |          |                      |          |
| CP000046.1 [39643:41649:r]       | <i>S. aureus</i> , COL                        |                                   |                      |                                                        |                         |          |                      |          |
| DQ106887.1 [15150:17156]         | <i>S. aureus</i>                              |                                   |                      |                                                        |                         |          |                      |          |
| GU370073.1 [28489:30495]         | <i>S. cohnii</i>                              |                                   |                      |                                                        |                         |          |                      |          |
| LCL_10002.1 [39734:41740:r]      | <i>S. aureus</i> , EMRSA15                    |                                   |                      |                                                        |                         |          |                      |          |
| Y13096.1 [2713:4719]             | <i>S. sciuri</i>                              |                                   |                      |                                                        |                         | <b>3</b> | <i>mecA_AB546266</i> | AB546266 |
| AB546266.1 [8628:10634:r]        | <i>S. fleurettii</i> , ATCC_BAA-274/CCUG43834 |                                   |                      |                                                        |                         |          |                      |          |
| AM048804.2 [1:2007]              | <i>S. kloosii</i>                             | <b>8</b>                          | <i>mecA_AM048805</i> | AM048805                                               |                         |          |                      |          |
| AM048805.2 [1:2007]              | <i>S. capitis</i>                             |                                   |                      |                                                        |                         |          |                      |          |
| Y13095.1 [3485:5491]             | <i>S. sciuri</i>                              | <b>31</b>                         | <i>mecA_Y13095</i>   | Y13095                                                 |                         |          |                      |          |

**Supplemental Table 4:** *mecA* sequences, alleles and predicted array hybridization patterns, continued

| Universal Sequence Allocator   | Species, isolate                       | Allele number<br>(as in Figure 1) | Allele designation       | Variant (based on<br>predicted amino<br>acid sequence) | Array pattern |
|--------------------------------|----------------------------------------|-----------------------------------|--------------------------|--------------------------------------------------------|---------------|
| AB546267.1 [7312:9318:r]       | <i>S. fleurettii</i>                   | 4                                 | <i>mecA_AB546267</i>     | AB546267                                               | [AB546267]    |
| AB546780.1 [7779:9785:r]       | <i>S. vitulinus</i>                    | 5                                 | <i>mecA_AB546780</i>     | AB546780                                               | [AB546780]    |
| AB547235.1 [15331:17331:r]     | <i>S. sciuri</i> , DSM16827/ATCC700061 | 6                                 | <i>mecA_AB547235</i>     | AB547235                                               | [AB547235]    |
| AB547236.1 [10164:12164:r]     | <i>S. sciuri</i>                       | 7                                 | <i>mecA_AB547236</i>     | AB547236                                               | [Y13094]      |
| Y13094.1 [2045:4045]           | <i>S. sciuri</i>                       | 30                                | <i>mecA_Y13094</i>       | Y13094                                                 |               |
| AM048806.2 [1:2007]            | <i>S. capitis</i>                      | 9                                 | <i>mecA_AM048807</i>     | AM048807                                               | [AM048807]    |
| AM048807.2 [1:2007]            | <i>S. kloosii</i>                      |                                   |                          |                                                        |               |
| AM048808.2 [1:2007]            | <i>S. kloosii</i>                      | 10                                | <i>mecA_AM048808</i>     | AM048808                                               |               |
| AM048809.2 [1:2007]            | <i>S. capitis</i>                      |                                   |                          |                                                        |               |
| AM048810.2 [1:2007]            | <i>S. vitulinus</i>                    |                                   |                          |                                                        |               |
| AM048811.2 [1:2007]            | <i>S. vitulinus</i>                    |                                   |                          |                                                        |               |
| AY786579.1 [1:2007]            | <i>S. aureus</i>                       | 11                                | <i>mecA_AY786579</i>     | AY786579                                               | [BA000018]    |
| AB063172.2 [17646:19652]       | <i>S. aureus</i> , JCSC1968-CA05       | 13                                | <i>mecA_ABSA01000066</i> | BA000018                                               |               |
| AB063173.1 [13643:15649]       | <i>S. aureus</i>                       |                                   |                          |                                                        |               |
| AB221121.1 [91:2097]           | <i>S. aureus</i>                       |                                   |                          |                                                        |               |
| AB221122.1 [91:2097]           | <i>S. aureus</i>                       |                                   |                          |                                                        |               |
| AB221124.1 [91:2097]           | <i>S. aureus</i>                       |                                   |                          |                                                        |               |
| AB245470.1 [13818:15824]       | <i>S. aureus</i> , NN1                 |                                   |                          |                                                        |               |
| AB266531.1 [43:2049:r]         | <i>S. aureus</i> , JCSC4744            |                                   |                          |                                                        |               |
| AB425823.1 [6037:8043:r]       | <i>S. aureus</i>                       |                                   |                          |                                                        |               |
| AB539727.1 [90010:92016:r]     | <i>S. aureus</i> , 16K                 |                                   |                          |                                                        |               |
| ABSA01000066.1 [11407:13413]   | <i>S. aureus</i> , JKD6009             |                                   |                          |                                                        |               |
| ACHE01000063.1 [1753:3759:r]   | <i>S. epidermidis</i>                  |                                   |                          |                                                        |               |
| ACHH02000005.1 [448122:450128] | <i>S. aureus</i> , TCH70               |                                   |                          |                                                        |               |
| ACJC01000132.1 [1335:3341]     | <i>S. epidermidis</i>                  |                                   |                          |                                                        |               |
| ACKC01000025.1 [1523:3529:r]   | <i>S. aureus</i> , A5937               |                                   |                          |                                                        |               |
| ACKD01000060.1 [7534:9540]     | <i>S. aureus</i> , A5948               |                                   |                          |                                                        |               |
| ACKE01000035.1 [1523:3529:r]   | <i>S. aureus</i> , A6224               |                                   |                          |                                                        |               |
| ACKF01000035.1 [1523:3529:r]   | <i>S. aureus</i> , A6300               |                                   |                          |                                                        |               |
| ACKJ01000051.1 [7533:9539]     | <i>S. aureus</i> , A9719               |                                   |                          |                                                        |               |
| ACKK01000007.1 [1523:3529:r]   | <i>S. aureus</i> , A9763               |                                   |                          |                                                        |               |
| ACKL01000046.1 [1523:3529:r]   | <i>S. aureus</i> , A9781               |                                   |                          |                                                        |               |
| ACOT01000006.1 [1523:3529:r]   | <i>S. aureus</i> , 132                 |                                   |                          |                                                        |               |
| ACSO01000033.1 [1523:3529:r]   | <i>S. aureus</i> , A10102              |                                   |                          |                                                        |               |
| ADAT01000064.1 [2772:4778:r]   | <i>S. aureus</i> , EMRSA16             |                                   |                          |                                                        |               |
| ADJI01000031.1 [1654:3660:r]   | <i>S. aureus</i> , A9754               |                                   |                          |                                                        |               |
| ADJJ01000027.1 [1929:3935:r]   | <i>S. aureus</i> , A8796               |                                   |                          |                                                        |               |
| ADJK01000025.1 [2021:4027:r]   | <i>S. aureus</i> , A8819               |                                   |                          |                                                        |               |

**Supplemental Table 4:** *mecA* sequences, alleles and predicted array hybridization patterns, continued

| Universal Sequence Allocator   | Species, isolate                 | Allele number<br>(as in Figure 1) | Allele designation                      | Variant (based on<br>predicted amino<br>acid sequence) | Array pattern             |
|--------------------------------|----------------------------------|-----------------------------------|-----------------------------------------|--------------------------------------------------------|---------------------------|
| ADMU01000036.1 [4771:6777]     | <i>S. epidermidis</i>            | 13<br>(continued)                 | <i>mecA_ABSA01000066</i><br>(continued) | BA000018<br>(continued)                                | [BA000018]<br>(continued) |
| AJ810120.1 [20316:22322]       | <i>S. aureus</i> , AR13.1-3330.2 |                                   |                                         |                                                        |                           |
| AJ810121.1 [13811:15817]       | <i>S. aureus</i>                 |                                   |                                         |                                                        |                           |
| AM904732.1 [17329:19335]       | <i>S. pseudintermedius</i>       |                                   |                                         |                                                        |                           |
| AM943017.1 [18829:20835]       | <i>S. aureus</i>                 |                                   |                                         |                                                        |                           |
| AP009324.1 [44992:46998:r]     | <i>S. aureus</i> , Mu3           |                                   |                                         |                                                        |                           |
| BA000033.2 [39602:41608:r]     | <i>S. aureus</i> , MW2-USA400    |                                   |                                         |                                                        |                           |
| BABM01000001.1 [44992:46998:r] | <i>S. aureus</i> , Mu50-omega    |                                   |                                         |                                                        |                           |
| BX571856.1 [44919:46925:r]     | <i>S. aureus</i> , MRSA252       |                                   |                                         |                                                        |                           |
| CABA01000047.1 [18898:20904]   | <i>S. aureus</i> , CF-Marseille  |                                   |                                         |                                                        |                           |
| CP000029.1 [2576656:2578662]   | <i>S. epidermidis</i>            |                                   |                                         |                                                        |                           |
| CP000255.1 [39127:41133:r]     | <i>S. aureus</i> , FPR3757       |                                   |                                         |                                                        |                           |
| CP000703.1 [38743:40749:r]     | <i>S. aureus</i> , JH9           |                                   |                                         |                                                        |                           |
| CP000730.1 [39127:41133:r]     | <i>S. aureus</i> , TCH1516       |                                   |                                         |                                                        |                           |
| CP000736.1 [38812:40818:r]     | <i>S. aureus</i> , JH1           |                                   |                                         |                                                        |                           |
| CP001844.2 [44034:46040:r]     | <i>S. aureus</i> , 04-02981      |                                   |                                         |                                                        |                           |
| CP002110.1 [478737:480743]     | <i>S. aureus</i> , TCH60         |                                   |                                         |                                                        |                           |
| CP002114.2 [39177:41183:r]     | <i>S. aureus</i> , JKD6159-ST93  |                                   |                                         |                                                        |                           |
| CP002120.1 [45140:47146:r]     | <i>S. aureus</i> , JKD6008-ST239 |                                   |                                         |                                                        |                           |
| EF596937.1 [4393:6399]         | <i>S. aureus</i>                 |                                   |                                         |                                                        |                           |
| EU437549.2 [18622:20628]       | <i>S. aureus</i> , cm11          |                                   |                                         |                                                        |                           |
| EU437550.1 [1871:3877]         | <i>S. aureus</i> , cm47          |                                   |                                         |                                                        |                           |
| FJ390057.1 [5560:7566:r]       | <i>S. aureus</i> , MRSA-C10682   |                                   |                                         |                                                        |                           |
| FJ670542.1 [25839:27845]       | <i>S. aureus</i> , BK20781       |                                   |                                         |                                                        |                           |
| GQ918137.1 [5822:7828:r]       | <i>S. aureus</i>                 |                                   |                                         |                                                        |                           |
| GU122149.1 [31646:33652:r]     | <i>S. aureus</i> , 45394F        |                                   |                                         |                                                        |                           |
| GU451305.1 [5464:7470:r]       | <i>S. epidermidis</i>            |                                   |                                         |                                                        |                           |
| GU451306.1 [4965:6971:r]       | <i>S. epidermidis</i>            |                                   |                                         |                                                        |                           |
| GU451307.1 [4966:6972:r]       | <i>S. epidermidis</i>            |                                   |                                         |                                                        |                           |
| HM030720.1 [35187:37193:r]     | <i>S. aureus</i>                 |                                   |                                         |                                                        |                           |
| HM030721.1 [8703:10709:r]      | <i>S. aureus</i>                 |                                   |                                         |                                                        |                           |
| X52592.1 [141:2147]            | <i>S. epidermidis</i>            |                                   |                                         |                                                        |                           |
| BA000017.4 [44992:46998:r]     | <i>S. aureus</i> , Mu50-VRSA     |                                   |                                         |                                                        |                           |
| BA000018.3 [45031:47037:r]     | <i>S. aureus</i> , N315          |                                   |                                         |                                                        |                           |
| D86934.2 [44770:46776]         | <i>S. aureus</i> , N315          |                                   |                                         |                                                        |                           |
| EU333401.1 [32:2038:r]         | <i>S. aureus</i>                 |                                   |                                         |                                                        |                           |
| EU929081.1 [1:2007]            | <i>S. pseudintermedius</i>       |                                   |                                         |                                                        |                           |
| EU929082.1 [1:2007]            | <i>S. pseudintermedius</i>       | 15                                | <i>mecA_EU929081</i>                    |                                                        |                           |
|                                |                                  | 16                                | <i>mecA_EU929082</i>                    |                                                        |                           |
| GU235984.1 [6042:8048:r]       | <i>S. aureus</i> , BK16704       | 23                                | <i>mecA_GU235984</i>                    | GU235984                                               |                           |

**Supplemental Table 4:** *mecA* sequences, alleles and predicted array hybridization patterns, continued

| Universal Sequence Allocator | Species, isolate                      | Allele number<br>(as in Figure 1) | Allele designation    | Variant (based on<br>predicted amino<br>acid sequence) | Array pattern |
|------------------------------|---------------------------------------|-----------------------------------|-----------------------|--------------------------------------------------------|---------------|
| AY820253.1 [20:2017]         | <i>S. sciuri</i>                      | 12                                | <i>mecA</i> _AY820253 | AY820253                                               | [AY820253]    |
| EU929079.1 [1:2007]          | <i>S. pseudintermedius</i>            | 17                                | <i>mecA</i> _EU929079 | EU929079                                               | [EU929079]    |
| EU929080.1 [1:2013]          | <i>S. pseudintermedius</i>            | 18                                | <i>mecA</i> _EU929080 | EU929080                                               | [Y00688]      |
| Y00688.1 [1:2013]            | <i>S. aureus</i>                      | 27                                | <i>mecA</i> _Y00688   | Y00688                                                 |               |
| AB121219.1 [6023:8029:r]     | <i>S. aureus</i> , JSCC3624-WIS       | 20                                | <i>mecA</i> _GQ902038 | GQ902038                                               | [GQ902038]    |
| AB353125.1 [14082:16088:r]   | <i>S. aureus</i> , P1                 |                                   |                       |                                                        |               |
| AB437289.1 [610:2616:r]      | <i>S. haemolyticus</i>                |                                   |                       |                                                        |               |
| AB437290.1 [610:2616:r]      | <i>S. aureus</i>                      |                                   |                       |                                                        |               |
| AB462393.1 [14082:16088:r]   | <i>S. aureus</i> , PM1                |                                   |                       |                                                        |               |
| AB478780.1 [14070:16076:r]   | <i>S. aureus</i> , JCSC5952-IM03      |                                   |                       |                                                        |               |
| AM292304.1 [14026:16032:r]   | <i>S. aureus</i> , MRSAZH47           |                                   |                       |                                                        |               |
| AM990992.1 [47524:49530:r]   | <i>S. aureus</i> , SO385-pig          |                                   |                       |                                                        |               |
| AP006716.1 [98075:100081:r]  | <i>S. haemolyticus</i>                |                                   |                       |                                                        |               |
| AY894415.1 [3099:5105:r]     | <i>S. aureus</i> , TSGH17             |                                   |                       |                                                        |               |
| FJ544922.1 [13636:15642:r]   | <i>S. pseudintermedius</i>            |                                   |                       |                                                        |               |
| GQ902038.1 [12639:14645:r]   | <i>S. aureus</i>                      |                                   |                       |                                                        |               |
| GU227428.1 [141:2147]        | <i>S. aureus</i>                      | 21                                | <i>mecA</i> _GU227428 | GU227428                                               | [Y14051]      |
| X52593.1 [141:2147]          | <i>S. aureus</i>                      | 32                                | <i>mecA</i> _Y14051   | Y14051                                                 |               |
| Y14051.1 [3472:5478]         | <i>S. aureus</i>                      |                                   |                       |                                                        |               |
| FR821779.1 [35681:37678:r]   | <i>S. aureus</i> , LGA251-cow         | 25                                | <i>mecA</i> _LGA251   | FR823292                                               | [FR823292]    |
| FR823292 [1741:3738]         | <i>S. aureus</i> , M10_0061           | 26                                | <i>mecA</i> _FR823292 |                                                        |               |
| AB547234.1 [15633:17633:r]   | <i>S. sciuri</i>                      | 28                                | <i>mecA</i> _Y09223   | Y09223                                                 | [Y09223]      |
| Y09223.1 [1640:3640]         | <i>S. sciuri</i> , DSM20345/ATCC29062 |                                   |                       |                                                        |               |
| Y13052.1 [1318:3318]         | <i>S. sciuri</i>                      |                                   |                       |                                                        |               |
|                              |                                       | 29                                | <i>mecA</i> _Y13052   | Y13052                                                 | [Y13052]      |







Supplemental Table 5: Experimental data and assignment of tested isolates to predicted patterns

| Isolate:                             | Species / Strain / SCCmec type: | Probe:  | 01_mecA_hp / 02_mecA_hp / 03_mecA_hp / 04_mecA_hp / 05_mecA_hp / 06_mecA_hp / 07_mecA_hp / 08_mecA_hp / 09_mecA_hp / 10_mecA_hp / 11_mecA_hp / 12_mecA_hp / 13_mecA_hp / 14_mecA_hp / 15_mecA_hp / 16_mecA_hp / 17_mecA_hp / 18_mecA_hp / 19_mecA_hp / 20_mecA_hp / 21_mecA_hp / 22_mecA_hp / 23_mecA_hp / 24_mecA_hp / 25_mecA_hp / 26_mecA_hp / 27_mecA_hp / 28_mecA_hp / 29_mecA_hp |            |            |            |            |            |            |            |            |            |            |            |            |            |            |            |            |            |            |            |            |            |            |            |            |            |            |            |            |      |
|--------------------------------------|---------------------------------|---------|----------------------------------------------------------------------------------------------------------------------------------------------------------------------------------------------------------------------------------------------------------------------------------------------------------------------------------------------------------------------------------------|------------|------------|------------|------------|------------|------------|------------|------------|------------|------------|------------|------------|------------|------------|------------|------------|------------|------------|------------|------------|------------|------------|------------|------------|------------|------------|------------|------------|------|
|                                      |                                 |         | 01_mecA_hp                                                                                                                                                                                                                                                                                                                                                                             | 02_mecA_hp | 03_mecA_hp | 04_mecA_hp | 05_mecA_hp | 06_mecA_hp | 07_mecA_hp | 08_mecA_hp | 09_mecA_hp | 10_mecA_hp | 11_mecA_hp | 12_mecA_hp | 13_mecA_hp | 14_mecA_hp | 15_mecA_hp | 16_mecA_hp | 17_mecA_hp | 18_mecA_hp | 19_mecA_hp | 20_mecA_hp | 21_mecA_hp | 22_mecA_hp | 23_mecA_hp | 24_mecA_hp | 25_mecA_hp | 26_mecA_hp | 27_mecA_hp | 28_mecA_hp | 29_mecA_hp |      |
| <b>Unexpected Pattern [JX094435]</b> |                                 |         |                                                                                                                                                                                                                                                                                                                                                                                        |            |            |            |            |            |            |            |            |            |            |            |            |            |            |            |            |            |            |            |            |            |            |            |            |            |            |            |            |      |
| FLI-08_LEM-1/2                       | S. sciuri                       | Exp. 1  | 0,00                                                                                                                                                                                                                                                                                                                                                                                   | 0,00       | 0,00       | 0,00       | 0,04       | 0,32       | 0,05       | 0,00       | 0,00       | 0,00       | 0,00       | 0,00       | 0,00       | 0,83       | 0,70       | 0,55       | 0,00       | 0,00       | 0,00       | 0,00       | 0,00       | 0,07       | 0,41       | 0,59       | 0,70       | 0,00       | 0,00       | 0,01       | 0,00       | 0,00 |
|                                      |                                 | Exp. 2  | 0,00                                                                                                                                                                                                                                                                                                                                                                                   | 0,00       | 0,00       | 0,00       | 0,13       | 0,56       | 0,17       | 0,02       | 0,00       | 0,00       | 0,00       | 0,02       | 0,00       | 0,82       | 0,78       | 0,70       | 0,00       | 0,00       | 0,00       | 0,00       | 0,00       | 0,17       | 0,28       | 0,65       | 0,76       | 0,75       | 0,00       | 0,00       | 0,00       | 0,00 |
|                                      |                                 | Exp. 1  | 0,00                                                                                                                                                                                                                                                                                                                                                                                   | 0,00       | 0,00       | 0,00       | 0,07       | 0,36       | 0,12       | 0,01       | 0,00       | 0,00       | 0,00       | 0,00       | 0,00       | 0,79       | 0,63       | 0,63       | 0,00       | 0,00       | 0,00       | 0,00       | 0,17       | 0,49       | 0,66       | 0,68       | 0,00       | 0,02       | 0,00       | 0,00       | 0,00       |      |
|                                      |                                 | Exp. 2  | 0,00                                                                                                                                                                                                                                                                                                                                                                                   | 0,00       | 0,00       | 0,00       | 0,05       | 0,30       | 0,07       | 0,00       | 0,00       | 0,00       | 0,00       | 0,00       | 0,00       | 0,79       | 0,64       | 0,57       | 0,00       | 0,00       | 0,00       | 0,00       | 0,12       | 0,44       | 0,64       | 0,69       | 0,00       | 0,00       | 0,00       | 0,00       | 0,00       |      |
|                                      |                                 | Exp. 3  | 0,00                                                                                                                                                                                                                                                                                                                                                                                   | 0,00       | 0,00       | 0,00       | 0,03       | 0,32       | 0,04       | 0,00       | 0,01       | 0,00       | 0,00       | 0,00       | 0,00       | 0,83       | 0,73       | 0,56       | 0,00       | 0,00       | 0,00       | 0,00       | 0,03       | 0,37       | 0,55       | 0,70       | 0,00       | 0,01       | 0,00       | 0,00       | 0,00       |      |
|                                      |                                 | Exp. 4  | 0,00                                                                                                                                                                                                                                                                                                                                                                                   | 0,00       | 0,00       | 0,00       | 0,08       | 0,50       | 0,09       | 0,01       | 0,00       | 0,00       | 0,00       | 0,00       | 0,00       | 0,82       | 0,78       | 0,68       | 0,00       | 0,00       | 0,00       | 0,00       | 0,05       | 0,52       | 0,67       | 0,76       | 0,00       | 0,00       | 0,00       | 0,00       | 0,00       |      |
|                                      |                                 | Exp. 5  | 0,00                                                                                                                                                                                                                                                                                                                                                                                   | 0,00       | 0,00       | 0,00       | 0,06       | 0,41       | 0,06       | 0,01       | 0,00       | 0,01       | 0,00       | 0,00       | 0,00       | 0,83       | 0,73       | 0,63       | 0,01       | 0,00       | 0,00       | 0,00       | 0,04       | 0,48       | 0,66       | 0,73       | 0,00       | 0,00       | 0,00       | 0,00       | 0,00       |      |
|                                      |                                 | Exp. 6  | 0,00                                                                                                                                                                                                                                                                                                                                                                                   | 0,00       | 0,00       | 0,00       | 0,08       | 0,53       | 0,10       | 0,01       | 0,00       | 0,00       | 0,00       | 0,00       | 0,00       | 0,81       | 0,78       | 0,68       | 0,00       | 0,00       | 0,00       | 0,00       | 0,06       | 0,56       | 0,70       | 0,77       | 0,00       | 0,00       | 0,00       | 0,00       | 0,00       |      |
|                                      |                                 | Exp. 7  | 0,00                                                                                                                                                                                                                                                                                                                                                                                   | 0,00       | 0,00       | 0,00       | 0,07       | 0,45       | 0,08       | 0,00       | 0,00       | 0,00       | 0,00       | 0,00       | 0,00       | 0,81       | 0,77       | 0,64       | 0,00       | 0,01       | 0,00       | 0,00       | 0,15       | 0,54       | 0,68       | 0,76       | 0,00       | 0,00       | 0,00       | 0,00       | 0,00       |      |
|                                      |                                 | Exp. 8  | 0,02                                                                                                                                                                                                                                                                                                                                                                                   | 0,00       | 0,00       | 0,00       | 0,09       | 0,53       | 0,09       | 0,01       | 0,00       | 0,00       | 0,00       | 0,00       | 0,00       | 0,82       | 0,77       | 0,69       | 0,00       | 0,01       | 0,00       | 0,00       | 0,06       | 0,56       | 0,69       | 0,77       | 0,00       | 0,01       | 0,00       | 0,01       | 0,00       |      |
|                                      |                                 | Exp. 9  | 0,00                                                                                                                                                                                                                                                                                                                                                                                   | 0,00       | 0,00       | 0,00       | 0,06       | 0,45       | 0,07       | 0,00       | 0,01       | 0,01       | 0,00       | 0,00       | 0,00       | 0,81       | 0,77       | 0,65       | 0,00       | 0,00       | 0,00       | 0,00       | 0,04       | 0,45       | 0,64       | 0,75       | 0,00       | 0,00       | 0,00       | 0,00       | 0,00       |      |
|                                      |                                 | Exp. 10 | 0,00                                                                                                                                                                                                                                                                                                                                                                                   | 0,00       | 0,00       | 0,00       | 0,03       | 0,40       | 0,05       | 0,01       | 0,00       | 0,00       | 0,00       | 0,00       | 0,00       | 0,79       | 0,70       | 0,56       | 0,00       | 0,00       | 0,00       | 0,00       | 0,08       | 0,39       | 0,58       | 0,71       | 0,00       | 0,00       | 0,00       | 0,00       | 0,00       |      |
|                                      |                                 | Exp. 11 | 0,00                                                                                                                                                                                                                                                                                                                                                                                   | 0,00       | 0,00       | 0,00       | 0,04       | 0,34       | 0,05       | 0,01       | 0,00       | 0,00       | 0,00       | 0,00       | 0,01       | 0,82       | 0,70       | 0,59       | 0,00       | 0,00       | 0,00       | 0,00       | 0,09       | 0,46       | 0,62       | 0,70       | 0,00       | 0,00       | 0,01       | 0,00       | 0,00       |      |

Patterns that were not identified during this study:

|                           |                                                                                                      |      |      |      |      |      |      |      |      |      |
|---------------------------|------------------------------------------------------------------------------------------------------|------|------|------|------|------|------|------|------|------|
| <b>Pattern [AB546267]</b> | Predicted reactivity for mecA_AB546267Sfleu:                                                         | 0,90 | 0,60 | 0,30 | 0,30 | 0,60 | 0,60 | 0,30 | 0,60 | 0,90 |
| <b>Pattern [AM048807]</b> | Predicted reactivity for mecA_AM048807: 0,90<br>Predicted reactivity for mecA_AM048808: 0,90         | 0,30 | 0,30 | 0,30 | 0,90 | 0,90 | 0,10 | 0,30 | 0,10 | 0,30 |
| <b>Pattern [EU929079]</b> | Predicted reactivity for mecA_EU929079: 0,30 0,90                                                    | 0,30 | 0,60 | 0,90 | 0,30 | 0,90 | 0,60 | 0,90 | 0,60 | 0,90 |
| <b>Pattern [Y00688]</b>   | Predicted reactivity for mecA_EU929080: 0,90 0,30<br>Predicted reactivity for mecA_Y00688: 0,90 0,30 | 0,30 | 0,60 | 0,90 | 0,30 | 0,90 | 0,90 | 0,60 | 0,90 | 0,60 |
| <b>Pattern [Y14051]</b>   | Predicted reactivity for mecA_GU227428: 0,90 0,30<br>Predicted reactivity for mecA_Y14051: 0,90 0,30 | 0,60 | 0,90 | 0,60 | 0,60 | 0,90 | 0,90 | 0,60 | 0,90 | 0,60 |
| <b>Pattern [Y13052]</b>   | Predicted reactivity for mecA_Y13052: 0,90 0,60 0,30                                                 | 0,60 | 0,90 | 0,60 | 0,60 | 0,90 | 0,90 | 0,60 | 0,90 | 0,60 |

This file shows the expected signal intensities for each variant of mecA and each probe on the array (on black background) as well as the actual measurements of all experiments performed (on white background, shaded according to signal intensity).

Strain designations: Red letters indicate strains for which mecA sequences are available. Staphylococcus aureus strains are highlighted in yellow, other species in grey.
